# Supplementary material for: Detecting Key Genes Regulated by miRNAs in Dysfunctional Crosstalk Pathway of Myasthenia Gravis
Source: Biomed Res Int. 2015 Feb 1;2015:724715. doi: 10.1155/2015/724715 (PMC4331476; doi:10.1155/2015/724715)
Supplement: Supplementary file 1 — Table S1: MiRNAs and mRNAs differentially expressed in MG Table S1 lists the miRNAs and mRNAs differentially expressed in MG. A total of 46 differentially expressed miRNAs were identified, including 21 upregulated miRNAs and 25 downregulated miRNAs. A total of 1135 differentially expressed mRNAs were obtained, including 551 upregulated mRNAs and 584 downregulated mRNAs. Table S2: The predicted targets of differentially expressed miRNAs Table S2 lists the predicted targets of differentially expressed miRNAs. A total of 46 differentially expressed miRNAs, 9567 predicted targets, 34963 miRNA-target regulations were obtained. Table S3: Pathways enriched in differentially expressed mRNAs and predicted target genes of differentially expressed miRNAs Table S3 presents significant pathways enriched by differentially expressed mRNAs and predicted genes of differentially expressed miRNAs. The up- and down-regulated mRNAs were significantly enriched in 13 pathways (define as P1) and 8 pathways (define as P2), respectively. The predicted targets of up- and down-regulated miRNAs were significantly enriched in 64 pathways (define as P3) and 68 pathways (define as P4), respectively. [file 724715.f1.zip]

Archive with 8 entries (7 files):
- Optional Supplementary Materials/E-MEXP-518.raw.1.zip
- Optional Supplementary Materials/Optional Supplementary Materials.docx
- Optional Supplementary Materials/Table S1.xlsx
- Optional Supplementary Materials/Table S2.xlsx
- Optional Supplementary Materials/Table S3.xlsx
- Optional Supplementary Materials/Table S6.xlsx
- Optional Supplementary Materials/Table S7.xlsx
- Optional Supplementary Materials/
