# Supplementary material for: Detecting Key Genes Regulated by miRNAs in Dysfunctional Crosstalk Pathway of Myasthenia Gravis
Source: Biomed Res Int. 2015 Feb 1;2015:724715. doi: 10.1155/2015/724715 (PMC4331476; doi:10.1155/2015/724715)
Supplement: Supplementary file 1 — Table S1: MiRNAs and mRNAs differentially expressed in MG Table S1 lists the miRNAs and mRNAs differentially expressed in MG. A total of 46 differentially expressed miRNAs were identified, including 21 upregulated miRNAs and 25 downregulated miRNAs. A total of 1135 differentially expressed mRNAs were obtained, including 551 upregulated mRNAs and 584 downregulated mRNAs. Table S2: The predicted targets of differentially expressed miRNAs Table S2 lists the predicted targets of differentially expressed miRNAs. A total of 46 differentially expressed miRNAs, 9567 predicted targets, 34963 miRNA-target regulations were obtained. Table S3: Pathways enriched in differentially expressed mRNAs and predicted target genes of differentially expressed miRNAs Table S3 presents significant pathways enriched by differentially expressed mRNAs and predicted genes of differentially expressed miRNAs. The up- and down-regulated mRNAs were significantly enriched in 13 pathways (define as P1) and 8 pathways (define as P2), respectively. The predicted targets of up- and down-regulated miRNAs were significantly enriched in 64 pathways (define as P3) and 68 pathways (define as P4), respectively. [file 724715.f1.zip › Optional Supplementary Materials/Table S1.xlsx]

## Sheet: Sheet2
Table S1 MiRNAs and mRNAs differentially expressed in MG
upregulated mRNAs	downregulated mRNAs	upregulated miRNAs	downregulated miRNAs
IFI44L	PTPRM	hsa-miR-23a	hsa-miR-107
LMAN1	RARRES1	hsa-miR-150	hsa-miR-20a
YWHAZ	EMC2	hsa-miR-26a	hsa-let-7i
CLP1	RAPGEF3	hsa-miR-27a	hsa-miR-25
CLIC1	TCEB1	hsa-miR-29a	hsa-let-7d
WNK1	MIPEP	hsa-miR-720	hsa-let-7b
FNBP4	METTL18	hsa-miR-1274b	hsa-miR-486-5p
MX1	BAG1	hsa-miR-21	hsa-miR-15a
PHF11	MPHOSPH9	hsa-miR-142-3p	hsa-let-7g
ANGEL1	TDRD9	hsa-miR-29b	hsa-miR-144
IL1B	MANF	hsa-miR-494	hsa-miR-93
PSMD4	KIAA0317	hsa-miR-1260	hsa-miR-20b
PSMC3	TLN2	hsa-miR-1225-5p	hsa-miR-185
KAT6A	DIDO1	hsa-miR-1274a	hsa-miR-92a
OXSR1	SALL2	hsa-miR-365	hsa-let-7c
BTG1	SOX15	hsa-miR-197	hsa-miR-363
KIF3B	IPCEF1	hsa-miR-129-5p	hsa-miR-324-3p
CTNND1	HSPA12A	hsa-miR-129-3p	hsa-miR-15b
SIPA1	ZMYM4	hsa-miR-634	hsa-let-7a
AQP7	ZBTB24	hsa-miR-933	hsa-let-7f
CLIP2	SUSD5	hsa-miR-602	hsa-miR-16
SOCS3	ZNF292		hsa-miR-451
CTIF	NUAK1		hsa-miR-139-5p
LRP3	ERP44		hsa-miR-320a
FAM189A1	PIP5K1C		hsa-miR-320b
IDH3A	ALPL
KIAA0664	STK17B
FBXL7	CUL4B
PLEKHM2	KLHL18
KIAA0930	CSDE1
FNDC3A	WDR47
HSPA4	KIAA0895
SORCS3	DNAH7
ERBB2IP	WDR37
RRM2B	B3GALT4
NOP10	BAZ1B
DAB1	HECTD1
NPHP3	SORBS1
CCS	STRADB
HIPK3	MYH7B
TYROBP	ZBTB26
ADAM12	KIF16B
VEGFA	CPEB4
AIM2	DUSP16
KAT2A	KIF21A
PSMC5	ZNF436
PPIE	AKAP13
CXCL13	ZGPAT
EXOC3	SDCBP
LOC151162	PTPN22
MAF	NPC1
HNRPM	STXBP1
CADM3	AGFG2
CUL3	FPGT
IGHA1	HS3ST1
MRPS22	SFRP4
RFXANK	MAN1A2
KCNK5	CLCN3
HAND2	LAMTOR5
FLOT1	CST7
IGLV6-57	SNAPC4
SH2D3C	IL15RA
PHB2	HR
BTRC	TNFSF13
SERBP1	SEL1L
TUBA1A	IGDCC3
OR52K3P	NME5
COPZ1	RAB2A
PCDHGC3	GPR75
GPSM3	MTMR6
SGK3	ZNF641
LIN7A	ZNF740
TLN1	ATP5H
FXYD5	NDUFAB1
ARHGEF12	TIA1
HSPA5	WISP1
UBQLN2	UTS2
STOML2	TTLL5
PUF60	SSR3
HSPB8	KLHL7
FBXL4	SPTLC2
EBF1	ITGA10
SEC11C	FLVCR1
GSTO1	SMO
NMRAL1	HECTD2
SCN3A	PRG3
PIDD	COQ6
RAB38	CCR9
NOX4	SLC6A14
ADRA2A	IKBKAP
TLR10	PEG3
PRICKLE3	TRIP4
JUN	POGLUT1
CD99	MTCH2
GYPA	AREL1
DYRK1A	LPAR2
HLA-DQA1	ARID4B
FAM89B	TRIM34
PPP1R14B	MANBA
TRMT1	UBE2D3
RPL23	TNS1
CACNA1S	TRIM29
SUGP1	ATP6AP2
SRM	C10orf11
HERPUD1	CHMP1B
NNAT	C12orf10
CBR3	PUM2
EPS8	ZNF268
TAF12	MACF1
PPIG	GLIS2
MAP2K5	PLVAP
TPR	NAA15
CCND3	AFG3L1P
RGPD5	CPM
MED22	ZNF271
SASH3	CTSD
KTN1	HBG2
CYTH3	PGM1
HLA-C	CLDN7
L3MBTL2	CD1B
WBP1L	ZNF415
NCL	WBP4
SLC16A5	PTGES
SLC25A38	GLRX3
C16orf58	SLC16A1
SDCCAG3	CLASP2
CEP164	NDUFAF2
PRPF6	ANKRD12
ZNF362	TSPAN6
TBC1D15	PRSS16
ACAD11	IER3
WDR54	CLMN
SNX22	KIFC3
C1orf115	ATP9B
ZNF496	RFPL1
CEP170B	RNF6
AUTS2	INADL
ATP2C2	ZMYM2
ANP32E	MYO1B
CTPS2	ZNF334
STX16	ZDHHC4
TSC22D1	UBE2W
ZNF768	REV1
ACAD9	CDKN2C
NFATC2IP	TAF15
VWDE	CYP4V2
HIATL1	ING1
ZNF337	GGPS1
HOXA2	AVIL
REV3L	ZNF329
VPS39	SLC25A12
MOB1A	TMEM150C
WDR75	SP140L
TOB2	DNAJB5
TIGD6	TPCN2
COL21A1	ACTR6
TMEM168	HBS1L
LRRC8C	EPC1
MYO9A	DNAJB14
NRBP2	GRHPR
TBC1D16	C16orf62
ASNA1	CPT1A
FOXM1	RAB5C
ZNF22	CORO7
CYP3A7	AEBP2
PPIF	RGNEF
SERPINF1	MTMR14
CD74	FBXW5
FOXO4	ZNF677
FRZB	TAF1B
CTGF	ATP5E
SURF1	CLDN4
TGIF1	TRIM52
FBLN5	RALA
FNTA	PLAGL2
LAIR1	GLG1
RING1	SLC17A9
MCRS1	LEPRE1
OAS1	RAB2B
MAN1B1	RNF170
RHOXF2	STT3B
MYL1	ZNF585B
PPFIA1	TNS4
PTPN2	TGM3
METAP2	MRGPRF
DSG2	RFX5
CASP3	ARMCX4
ADD3	RBMX2
KLF6	NEK7
CSNK1A1	MTHFD1L
ATP5A1	ACTL6A
QPCT	AP2A1
APOC1	UNC119B
S100A4	PXK
VAMP8	KLC4
TMSB10	PPP3CA
RPL7	TRIM69
FOS	PFDN1
EIF4A1	RAD51
TPM3	EBNA1BP2
RNGTT	PLXND1
KRT16	SETMAR
SLBP	SERPING1
KCNG1	SEPT8
DNM1	USP14
ZFP36L2	IL1RL1
UBD	DUSP3
BAK1	GYS1
SPRED2	OPRL1
SON	HYAL3
PSEN1	HYAL1
CRH	POP1
SLC1A4	PTN
BRAP	KRT15
BRD3	CNN2
CHST10	N4BP2L2
GRAMD4	FOXO3
IRF8	NAAA
MYD88	UQCRC1
NDUFC1	MYO10
GOSR1	NDUFA2
GLRX2	RPS7
KIAA0174	GPR171
TRA2B	LYPD1
NDUFS2	ITGAE
LONP1	HIST1H2AE
AKR1B1	COX7A2
FEN1	BRD8
PDHB	CYP24A1
MRPL28	PPAP2B
PSMB1	DUSP8
SLC25A19	LMO7
RASL11B	ICAM2
DGUOK	NAA38
SDHA	PDGFRA
DDAH2	PCDH7
LAT2	IGFBP3
F11R	CELSR1
WNT5B	DNM1L
MEIS2	DHFR
EI24	NME3
KEAP1	TRIP13
ARAF	PDIA4
CHMP2A	UQCRC2
NPC2	MXD3
CTSS	HSP90AA1
KRT14	PPP2R5D
KRT7	TRIM62
BOLA1	SH3GL1
TPM4	TRPC4AP
RBM42	MAPKAPK3
CHRNA3	NARS
LGALS3BP	LGALS1
NXT1	ANGPTL7
MGAT1	DHRS3
LIMD2	PPAP2C
ATP6V1E1	CARS
UFD1L	GFOD2
CLK3	GATA3
SH3BP5	LAPTM4A
GUK1	SPOP
CLTB	HNRNPC
PHF20	TRIM13
U2SURP	MMP7
HLX	RBM10
ACTG1	PLXNB2
PPP1R2	CA3
UBL7	SLC25A1
IGFBP5	GLRX
LOC339803	EPB41L3
CCL5	ASRGL1
NRD1	VPS25
ITGAL	PEX14
YBX3	PDZK1
ARHGDIB	APCS
FNBP1	PLAT
HPCAL1	LOC81691
EEF1D	DUSP2
PLEKHO1	PAXIP1
PELP1	UBE2G2
PCSK7	EIF3E
TM9SF1	TM4SF1
ACAA1	ACTR3B
ZNF3	GPANK1
TMEM159	KRT6A
RAB11A	KLC1
SERPINB13	TFG
ANXA11	HPS6
WDFY1	BNIP3
IFNAR1	LRWD1
TAPBP	CCT5
NANS	DRD5
CBX7	MUS81
PSMC4	DRAP1
CHERP	CLDN15
TUBA4A	STOM
ACP2	PI3
PRELP	OSM
C1D	IL17RA
TPM2	PPP2CB
EIF4E2	PDZD8
UBAC1	BHMT
CLTA	DNTT
CPT2	OIP5
ITPKB	TSSC1
MTMR1	SMARCD2
B4GALT5	PNP
MYH9	TXNL4A
HDAC5	TNFSF4
IGL	SERPINE2
PHF1	C1orf194
NAGPA	SNRPA
ACTA2	EIF4H
PLXNA3	DHRSX
HLA-DRA	SP100
EPB41L2	SPRR2A
SFRS4	SETD2
DARS	IGSF2
YWHAH	LOC644172
CDC25B	SERPINB5
GCG	TRIAP1
MYL6B	USP10
MS4A1	FARSA
PI4KB	NSMAF
BECN1	C4A
PSMD13	PGF
LYN	CHST2
YWHAE	MRS2L
KRIT1	IRF9
TAF9	USP11
PRMT1	SPG7
GPS1	CCNC
ATOX1	RAD21
HLA-DOB	VPS45
TNFRSF17	ABCF2
SKAP1	DMWD
MRPL3	ATP5J
FMNL1	GTF2F2
PEBP1	WDR1
BBC3	TECR
PCYT1A	BAP1
LYPLA1	SNRPG
CAT	CCNI
METTL3	XPO7
IGF2R	HINT1
RHOG	PIGC
TADA3	TACSTD2
HADHA	LRRFIP1
EIF3I	CSK
MLLT11	RPL10A
UBB	IMP4
SERPINA3	KRT81
TRIP10	NDUFB5
SCAMP1	EIF1AY
HLA-DQB1	VARS
CNPY3	BCAS2
TRAF2	SLPI
MCM7	C8orf59
DGCR6L	BET1
TNK2	ARPC3
P4HB	LPAR1
LIG1	CDK2AP1
KDELR1	RAC2
MRPS27	TMED10
CYBA	HDGF
NME1	SHB
SPIB	LGALS3
TCL1A	IDH1
CD79A	HBD
VAT1	EMG1
GSN	IMPDH2
CD44	TCF12
RPS6KA1	MAPK1
LTF	RPUSD2
EEF1G	CYFIP1
DLGAP5	PPIP5K2
UBTF	DECR1
MYO9B	CUL1
CCNO	TCEAL1
PCOLCE	SLC22A18
LAMP2	CAPN2
MEST	COX6C
RFK	CD3D
PBXIP1	HAL
ICA1	NR1D2
CCL21	SKIV2L2
SNX3	USP8
ATF4	PSMD5
CDR2	NCAPH
EIF6	DCLRE1A
LOC652128	MBTPS1
PTPN11	RAB21
AMT	CCL17
PMPCA	ADD1
AFAP1	PDIA5
PCMT1	ATP5I
ARHGAP25	RPS21
HELZ	GOLGA3
KLF9	SEC14L1
ARL6IP1	DPYSL3
TBXA2R	RAB7L1
KCNJ8	NPY6R
EFR3A	RB1CC1
MLEC	UPF1
CTR9	KLHDC10
CLGN	SLC35A1
PXDN	SLC33A1
SLC23A2	EDNRA
PALM	ATP6V1D
POLR2L	CFI
CR2	LAMC1
ANXA5	SFTPC
CYP19A1	BNC1
IFITM2	CREB5
C3	RHOA
PRKCQ	GPLD1
NELFE	DRD4
CCR7	TKT
GAS1	IGHMBP2
TJP2	ZNF141
COMP	GRIA2
CXCL12	AVPR1A
FAM134C	LBR
ST8SIA4	ST3GAL1
ST8SIA1	GPD1
FOSB	MTOR
HPGD	SGCA
A2M	MTIF2
CDR1	ALDH5A1
PRKAR1A	PPP2R5E
KLK3	PDGFB
CCL3	CD8A
HLA-DPA1	PCNA
CD1A	CTSG
XRCC5	BCHE
TCF3	THBD
BCL3	ABCB4
CSF1	RASA1
H2AFZ	NPM1
RPS4Y1	HBZ
CD63	CD80
PRPH2	ZNF84
FMO1	CD1C
PTPN7	IL7R
SRD5A2	LCP1
SLC25A46	TPP2
CD79B	SLC2A3P1
EGR1	NCKAP1L
AHNAK	NFKB1
ELF1	CERS1
GJB2	HSF1
CAPG	DST
CANX	GAD2
PURA	ETF1
KRT2	IL5RA
GALNS	PCSK6
ADORA3	S100A7
ACVR2B	AKAP5
ALPI	LMNB2
FKBP4	STAT1
GBP1	GART
IL13	ADRB2
SLC34A1	SLC12A1
TCF7	ABCC8
ZNF177	AK1
DGKE	APOA4
CD84	CACNG1
TMPRSS11D	GABRA3
FOXA3	SLC2A4
AGTR1	ASIC2
RBMY1A1	IGSF1
SLC15A1	CXCL10
ROD1	MGAT5
NCOA4	MAPK8
HEXIM1	SCN9A
PDIA2	SPN
LILRB3	TJP1
PSEN2	HIST1H4K
VCL	TOP3B
SACM1L	RHBDL1
SLC6A7	CCRL2
KIAA0101	PYY
MRPL19	PNMA1
PSMD6	PLCL1
DEFA5	IGF2BP3
ELK4	SLC17A3
KCTD17	WDR45
SMARCA2	TESPA1
GUCY2C	TECPR2
MSMB	FAM155B
NKG7	PQLC2
E2F4	PCDH8
ITGB7	GRIK5
CNN3	PPIC
PHB	GABRA6
FASLG	BCL6
TMPO	ABR
ANK3	FBLN1
RORC	EP300
ST13	FLT3LG
NAIP	RAB40B
MAPRE1	ZNF135
TGM4	ZNF137P
PPIL2	ST5
ZNF211	PEX5
IKZF1	CX3CR1
ROCK1	CTCF
ME1	UCP1
SMAD4	GFER
STIM1	ELF4
ST3GAL2	SLAMF1
SMARCC1	ILK
FXYD1	EMB
TXN2	SLC1A5
INPP5D	CCL13
SORL1	ZSCAN9
GABRP	CCL20
TAF11	EFNB3
C2	ATM
ABHD2	ARNTL
IL6R	ZNF32
CSNK2B	CNOT4
ACTG2	UBE2C
ITGB4	RABIF
LAG3	TAF4
ALOX5AP	MAP4K5
KLRC1	LITAF
USF1	GRIN2C
NOMO1	PPM1D
CCND1	ARG2
CD9	CD5L
ACVR2A	BBS9
EGR3	SC4MOL
NUP214	ZNF230
CNTN2	RAF1
IDH2	TG
RBBP7	GHR
MPI	ZNF35
ZNF345	EPX
ARCN1	IRF1
TRIM22	VCAN
ZMYND11	CYP4B1
NPRL3	ENO3
SIX1	MYL12A
AP2S1	ITPKA
MT1L	MRC1
PNN	EEF1B2
SEPP1	PVALB
RHOH	WFDC2
MRPS31	PTX3
SCFV	TOP2B
	ADORA2B
	UTRN
	MYOM1
	TGFA
	PPP2R4
	KRT20
	PPP1CC
	ABCE1
	KHK
	AUH
	PKP4
	DAP3
	SCNN1G
	CTSC
	MOGS
	FAT1
	TTN
	RABEP1
	TFAP2B
	CDK1
	PABPC1
	SOD2
	RIT1
	UNG
	CES2
	RTCA
	PIK3C2A
	CAV3
	COX7B
	BCL2L1
	PCBP1
	GTF2H2
	ATP2A3
