# Supplementary material for: Detecting Key Genes Regulated by miRNAs in Dysfunctional Crosstalk Pathway of Myasthenia Gravis
Source: Biomed Res Int. 2015 Feb 1;2015:724715. doi: 10.1155/2015/724715 (PMC4331476; doi:10.1155/2015/724715)
Supplement: Supplementary file 1 — Table S1: MiRNAs and mRNAs differentially expressed in MG Table S1 lists the miRNAs and mRNAs differentially expressed in MG. A total of 46 differentially expressed miRNAs were identified, including 21 upregulated miRNAs and 25 downregulated miRNAs. A total of 1135 differentially expressed mRNAs were obtained, including 551 upregulated mRNAs and 584 downregulated mRNAs. Table S2: The predicted targets of differentially expressed miRNAs Table S2 lists the predicted targets of differentially expressed miRNAs. A total of 46 differentially expressed miRNAs, 9567 predicted targets, 34963 miRNA-target regulations were obtained. Table S3: Pathways enriched in differentially expressed mRNAs and predicted target genes of differentially expressed miRNAs Table S3 presents significant pathways enriched by differentially expressed mRNAs and predicted genes of differentially expressed miRNAs. The up- and down-regulated mRNAs were significantly enriched in 13 pathways (define as P1) and 8 pathways (define as P2), respectively. The predicted targets of up- and down-regulated miRNAs were significantly enriched in 64 pathways (define as P3) and 68 pathways (define as P4), respectively. [file 724715.f1.zip › Optional Supplementary Materials/Table S2.xlsx]

## Sheet: Sheet1
Table S2 The predicted targets of differentially expressed miRNAs
upregulated miRNA	predicted targets	downregulated miRNA	predicted targets
hsa-miR-23a	SAMD11	hsa-miR-107	DVL1
hsa-miR-23a	CAMTA1	hsa-miR-107	PER3
hsa-miR-23a	CTNNBIP1	hsa-miR-107	UBE4B
hsa-miR-23a	KIF1B	hsa-miR-107	KIF1B
hsa-miR-23a	TARDBP	hsa-miR-107	CASZ1
hsa-miR-23a	PRAMEF12	hsa-miR-107	SRM
hsa-miR-23a	HMGCL	hsa-miR-107	MTOR
hsa-miR-23a	PNRC2	hsa-miR-107	MTHFR
hsa-miR-23a	TMEM50A	hsa-miR-107	MFN2
hsa-miR-23a	TRIM63	hsa-miR-107	ARHGEF10L
hsa-miR-23a	PDIK1L	hsa-miR-107	UBR4
hsa-miR-23a	HMGN2	hsa-miR-107	CDC42
hsa-miR-23a	SLC9A1	hsa-miR-107	C1QB
hsa-miR-23a	STX12	hsa-miR-107	FAM54B
hsa-miR-23a	SESN2	hsa-miR-107	STMN1
hsa-miR-23a	MATN1	hsa-miR-107	PDIK1L
hsa-miR-23a	SNRNP40	hsa-miR-107	HMGN2
hsa-miR-23a	PTP4A2	hsa-miR-107	WDTC1
hsa-miR-23a	MARCKSL1	hsa-miR-107	CD164L2
hsa-miR-23a	S100PBP	hsa-miR-107	BSDC1
hsa-miR-23a	FNDC5	hsa-miR-107	AK2
hsa-miR-23a	PHC2	hsa-miR-107	EIF2C4
hsa-miR-23a	MTF1	hsa-miR-107	EIF2C1
hsa-miR-23a	CTPS	hsa-miR-107	OSCP1
hsa-miR-23a	RIMKLA	hsa-miR-107	YRDC
hsa-miR-23a	KDM4A	hsa-miR-107	MTF1
hsa-miR-23a	ZSWIM5	hsa-miR-107	HPCAL4
hsa-miR-23a	GPBP1L1	hsa-miR-107	MYCL1
hsa-miR-23a	PIK3R3	hsa-miR-107	RIMS3
hsa-miR-23a	DMBX1	hsa-miR-107	POMGNT1
hsa-miR-23a	EPS15	hsa-miR-107	CC2D1B
hsa-miR-23a	ZYG11B	hsa-miR-107	NFIA
hsa-miR-23a	C1orf168	hsa-miR-107	INADL
hsa-miR-23a	ALG6	hsa-miR-107	INSL5
hsa-miR-23a	JAK1	hsa-miR-107	SERBP1
hsa-miR-23a	DNAJC6	hsa-miR-107	LRRC7
hsa-miR-23a	PDE4B	hsa-miR-107	ZRANB2
hsa-miR-23a	MIER1	hsa-miR-107	FAM73A
hsa-miR-23a	DEPDC1	hsa-miR-107	FUBP1
hsa-miR-23a	LRRC40	hsa-miR-107	DNAJB4
hsa-miR-23a	NEGR1	hsa-miR-107	LPHN2
hsa-miR-23a	LPHN2	hsa-miR-107	TTLL7
hsa-miR-23a	HS2ST1	hsa-miR-107	SYDE2
hsa-miR-23a	GBP3	hsa-miR-107	COL24A1
hsa-miR-23a	GBP1	hsa-miR-107	LRRC8D
hsa-miR-23a	TGFBR3	hsa-miR-107	ZNF326
hsa-miR-23a	C1orf146	hsa-miR-107	TGFBR3
hsa-miR-23a	TMED5	hsa-miR-107	FNBP1L
hsa-miR-23a	FNBP1L	hsa-miR-107	CNN3
hsa-miR-23a	AL161744.1	hsa-miR-107	CDC14A
hsa-miR-23a	GPR88	hsa-miR-107	VAV3
hsa-miR-23a	PRMT6	hsa-miR-107	STXBP3
hsa-miR-23a	CSF1	hsa-miR-107	CELSR2
hsa-miR-23a	FAM40A	hsa-miR-107	SYPL2
hsa-miR-23a	CTTNBP2NL	hsa-miR-107	KCNC4
hsa-miR-23a	ST7L	hsa-miR-107	ST7L
hsa-miR-23a	MAGI3	hsa-miR-107	RSBN1
hsa-miR-23a	RSBN1	hsa-miR-107	SYT6
hsa-miR-23a	SIKE1	hsa-miR-107	CSDE1
hsa-miR-23a	TRIM45	hsa-miR-107	IGSF3
hsa-miR-23a	GOLPH3L	hsa-miR-107	GDAP2
hsa-miR-23a	CTSK	hsa-miR-107	NOTCH2
hsa-miR-23a	PIP5K1A	hsa-miR-107	ITGA10
hsa-miR-23a	POGZ	hsa-miR-107	PRKAB2
hsa-miR-23a	SNX27	hsa-miR-107	OTUD7B
hsa-miR-23a	IL6R	hsa-miR-107	ENSA
hsa-miR-23a	IGSF8	hsa-miR-107	ARNT
hsa-miR-23a	SLAMF1	hsa-miR-107	PI4KB
hsa-miR-23a	RGS5	hsa-miR-107	SELENBP1
hsa-miR-23a	RXRG	hsa-miR-107	UBE2Q1
hsa-miR-23a	ALDH9A1	hsa-miR-107	FAM189B
hsa-miR-23a	TADA1	hsa-miR-107	ASH1L
hsa-miR-23a	POU2F1	hsa-miR-107	MEF2D
hsa-miR-23a	DNM3	hsa-miR-107	SH2D2A
hsa-miR-23a	C1orf9	hsa-miR-107	CCDC19
hsa-miR-23a	CEP350	hsa-miR-107	NHLH1
hsa-miR-23a	LHX4	hsa-miR-107	LY9
hsa-miR-23a	STX6	hsa-miR-107	FCGR2B
hsa-miR-23a	RGS8	hsa-miR-107	RGS4
hsa-miR-23a	LAMC2	hsa-miR-107	PRRC2C
hsa-miR-23a	SWT1	hsa-miR-107	VAMP4
hsa-miR-23a	RGS18	hsa-miR-107	RC3H1
hsa-miR-23a	RGS13	hsa-miR-107	RFWD2
hsa-miR-23a	B3GALT2	hsa-miR-107	FAM5B
hsa-miR-23a	ZBTB41	hsa-miR-107	RASAL2
hsa-miR-23a	CRB1	hsa-miR-107	CEP350
hsa-miR-23a	LHX9	hsa-miR-107	RNASEL
hsa-miR-23a	ATP6V1G3	hsa-miR-107	LAMC1
hsa-miR-23a	ZNF281	hsa-miR-107	C1orf21
hsa-miR-23a	CAMSAP1L1	hsa-miR-107	EDEM3
hsa-miR-23a	KLHL12	hsa-miR-107	IVNS1ABP
hsa-miR-23a	SNRPE	hsa-miR-107	TPR
hsa-miR-23a	NUAK2	hsa-miR-107	KCNT2
hsa-miR-23a	YOD1	hsa-miR-107	NAV1
hsa-miR-23a	SERTAD4	hsa-miR-107	IPO9
hsa-miR-23a	KCTD3	hsa-miR-107	LMOD1
hsa-miR-23a	USH2A	hsa-miR-107	ARL8A
hsa-miR-23a	RRP15	hsa-miR-107	KDM5B
hsa-miR-23a	MARK1	hsa-miR-107	BTG2
hsa-miR-23a	MIA3	hsa-miR-107	RASSF5
hsa-miR-23a	C1orf65	hsa-miR-107	PLXNA2
hsa-miR-23a	LBR	hsa-miR-107	PPP2R5A
hsa-miR-23a	LIN9	hsa-miR-107	SLC30A10
hsa-miR-23a	C1orf96	hsa-miR-107	CNIH3
hsa-miR-23a	TSNAX	hsa-miR-107	WNT3A
hsa-miR-23a	RP5-862P8.2	hsa-miR-107	SIPA1L2
hsa-miR-23a	ACTN2	hsa-miR-107	RP5-862P8.2
hsa-miR-23a	RYR2	hsa-miR-107	KCNK1
hsa-miR-23a	GREM2	hsa-miR-107	IRF2BP2
hsa-miR-23a	ZNF238	hsa-miR-107	GREM2
hsa-miR-23a	HNRNPU	hsa-miR-107	AKT3
hsa-miR-23a	ZNF695	hsa-miR-107	C1orf101
hsa-miR-23a	ZNF669	hsa-miR-107	SCCPDH
hsa-miR-23a	PGBD2	hsa-miR-107	USP6NL
hsa-miR-23a	ZMYND11	hsa-miR-107	UPF2
hsa-miR-23a	DIP2C	hsa-miR-107	FRMD4A
hsa-miR-23a	WDR37	hsa-miR-107	FAM171A1
hsa-miR-23a	CELF2	hsa-miR-107	C1QL3
hsa-miR-23a	USP6NL	hsa-miR-107	RSU1
hsa-miR-23a	FAM171A1	hsa-miR-107	NEBL
hsa-miR-23a	AL928580.1	hsa-miR-107	PIP4K2A
hsa-miR-23a	MRC1	hsa-miR-107	ENKUR
hsa-miR-23a	ABI1	hsa-miR-107	CUL2
hsa-miR-23a	KIAA1462	hsa-miR-107	ARHGAP22
hsa-miR-23a	MAP3K8	hsa-miR-107	PRKG1
hsa-miR-23a	ZEB1	hsa-miR-107	PHYHIPL
hsa-miR-23a	ZNF37A	hsa-miR-107	CCDC6
hsa-miR-23a	CXCL12	hsa-miR-107	RTKN2
hsa-miR-23a	UBE2D1	hsa-miR-107	HERC4
hsa-miR-23a	TFAM	hsa-miR-107	SLC29A3
hsa-miR-23a	PHYHIPL	hsa-miR-107	DNAJC9
hsa-miR-23a	CCDC6	hsa-miR-107	PPP3CB
hsa-miR-23a	EGR2	hsa-miR-107	VCL
hsa-miR-23a	DNAJC12	hsa-miR-107	AP3M1
hsa-miR-23a	SIRT1	hsa-miR-107	VDAC2
hsa-miR-23a	RUFY2	hsa-miR-107	DLG5
hsa-miR-23a	CCAR1	hsa-miR-107	SFTPD
hsa-miR-23a	EIF4EBP2	hsa-miR-107	C10orf57
hsa-miR-23a	PLAU	hsa-miR-107	SH2D4B
hsa-miR-23a	POLR3A	hsa-miR-107	CDHR1
hsa-miR-23a	PPIF	hsa-miR-107	WAPAL
hsa-miR-23a	GHITM	hsa-miR-107	SNCG
hsa-miR-23a	LRIT2	hsa-miR-107	GLUD1
hsa-miR-23a	FAM35A	hsa-miR-107	PTEN
hsa-miR-23a	ATAD1	hsa-miR-107	RNLS
hsa-miR-23a	PTEN	hsa-miR-107	IFIT1B
hsa-miR-23a	FAS	hsa-miR-107	PCGF5
hsa-miR-23a	IFIT5	hsa-miR-107	CPEB3
hsa-miR-23a	IFIT2	hsa-miR-107	SLC35G1
hsa-miR-23a	KIF20B	hsa-miR-107	NOC3L
hsa-miR-23a	TNKS2	hsa-miR-107	PIK3AP1
hsa-miR-23a	BTAF1	hsa-miR-107	LCOR
hsa-miR-23a	KIF11	hsa-miR-107	ARHGAP19
hsa-miR-23a	FRA10AC1	hsa-miR-107	EXOSC1
hsa-miR-23a	SLC35G1	hsa-miR-107	ZDHHC16
hsa-miR-23a	FRAT2	hsa-miR-107	MMS19
hsa-miR-23a	CHUK	hsa-miR-107	BTRC
hsa-miR-23a	BLOC1S2	hsa-miR-107	SUFU
hsa-miR-23a	ELOVL3	hsa-miR-107	CNNM2
hsa-miR-23a	CNNM2	hsa-miR-107	TAF5
hsa-miR-23a	DUSP5	hsa-miR-107	PDCD11
hsa-miR-23a	ADRA2A	hsa-miR-107	ITPRIP
hsa-miR-23a	VTI1A	hsa-miR-107	PDCD4
hsa-miR-23a	CASP7	hsa-miR-107	KIAA1598
hsa-miR-23a	DCLRE1A	hsa-miR-107	RAB11FIP2
hsa-miR-23a	HSPA12A	hsa-miR-107	EIF3A
hsa-miR-23a	RAB11FIP2	hsa-miR-107	FGFR2
hsa-miR-23a	C10orf46	hsa-miR-107	PLEKHA1
hsa-miR-23a	EIF3A	hsa-miR-107	ZRANB1
hsa-miR-23a	FAM45A	hsa-miR-107	CTBP2
hsa-miR-23a	GRK5	hsa-miR-107	BNIP3
hsa-miR-23a	SEC23IP	hsa-miR-107	PNPLA2
hsa-miR-23a	METTL10	hsa-miR-107	TRIM68
hsa-miR-23a	FAM175B	hsa-miR-107	UBQLNL
hsa-miR-23a	EBF3	hsa-miR-107	SMPD1
hsa-miR-23a	INPP5A	hsa-miR-107	STK33
hsa-miR-23a	TEAD1	hsa-miR-107	WEE1
hsa-miR-23a	RRAS2	hsa-miR-107	PTH
hsa-miR-23a	PIK3C2A	hsa-miR-107	COPB1
hsa-miR-23a	E2F8	hsa-miR-107	PDE3B
hsa-miR-23a	SLC17A6	hsa-miR-107	PDE3B
hsa-miR-23a	LGR4	hsa-miR-107	SLC6A5
hsa-miR-23a	LIN7C	hsa-miR-107	ANO3
hsa-miR-23a	MPPED2	hsa-miR-107	BDNF
hsa-miR-23a	DNAJC24	hsa-miR-107	CAPRIN1
hsa-miR-23a	RCN1	hsa-miR-107	SLC1A2
hsa-miR-23a	CCDC73	hsa-miR-107	PRR5L
hsa-miR-23a	QSER1	hsa-miR-107	HSD17B12
hsa-miR-23a	CSTF3	hsa-miR-107	EXT2
hsa-miR-23a	CAPRIN1	hsa-miR-107	MADD
hsa-miR-23a	ELF5	hsa-miR-107	FNBP4
hsa-miR-23a	EHF	hsa-miR-107	LRRC55
hsa-miR-23a	AMBRA1	hsa-miR-107	CTNND1
hsa-miR-23a	TIMM10	hsa-miR-107	RTN3
hsa-miR-23a	STX3	hsa-miR-107	ESRRA
hsa-miR-23a	OTUB1	hsa-miR-107	SF1
hsa-miR-23a	B3GNT1	hsa-miR-107	CDC42EP2
hsa-miR-23a	ADRBK1	hsa-miR-107	CFL1
hsa-miR-23a	LRP5	hsa-miR-107	C11orf68
hsa-miR-23a	CCND1	hsa-miR-107	RAB1B
hsa-miR-23a	LAMTOR1	hsa-miR-107	PPP1CA
hsa-miR-23a	PRKRIR	hsa-miR-107	POLD3
hsa-miR-23a	C11orf30	hsa-miR-107	ACER3
hsa-miR-23a	ODZ4	hsa-miR-107	AQP11
hsa-miR-23a	ODZ4	hsa-miR-107	CCDC83
hsa-miR-23a	PRCP	hsa-miR-107	KDM4D
hsa-miR-23a	DLG2	hsa-miR-107	SLN
hsa-miR-23a	CREBZF	hsa-miR-107	ZC3H12C
hsa-miR-23a	CCDC83	hsa-miR-107	ARHGAP20
hsa-miR-23a	PICALM	hsa-miR-107	C11orf53
hsa-miR-23a	TMEM135	hsa-miR-107	SIK2
hsa-miR-23a	CTSC	hsa-miR-107	ZW10
hsa-miR-23a	NOX4	hsa-miR-107	USP28
hsa-miR-23a	FAT3	hsa-miR-107	UBE4A
hsa-miR-23a	C11orf75	hsa-miR-107	PVRL1
hsa-miR-23a	FUT4	hsa-miR-107	PANX3
hsa-miR-23a	CCDC82	hsa-miR-107	TBRG1
hsa-miR-23a	DCUN1D5	hsa-miR-107	CHEK1
hsa-miR-23a	ARHGAP20	hsa-miR-107	KDM5A
hsa-miR-23a	ALG9	hsa-miR-107	TSPAN9
hsa-miR-23a	SDHD	hsa-miR-107	PRMT8
hsa-miR-23a	C11orf63	hsa-miR-107	VAMP1
hsa-miR-23a	CLMP	hsa-miR-107	IFFO1
hsa-miR-23a	PANX3	hsa-miR-107	COPS7A
hsa-miR-23a	NRGN	hsa-miR-107	PEX5
hsa-miR-23a	TMEM218	hsa-miR-107	NECAP1
hsa-miR-23a	FAM118B	hsa-miR-107	SLC2A14
hsa-miR-23a	PRDM10	hsa-miR-107	SLC2A3
hsa-miR-23a	ZBTB44	hsa-miR-107	FOXJ2
hsa-miR-23a	WNK1	hsa-miR-107	M6PR
hsa-miR-23a	RAD51AP1	hsa-miR-107	GABARAPL1
hsa-miR-23a	ENO2	hsa-miR-107	GRIN2B
hsa-miR-23a	CD163	hsa-miR-107	WBP11
hsa-miR-23a	MFAP5	hsa-miR-107	AEBP2
hsa-miR-23a	M6PR	hsa-miR-107	GOLT1B
hsa-miR-23a	KLRF1	hsa-miR-107	KIAA0528
hsa-miR-23a	CLEC2B	hsa-miR-107	ETNK1
hsa-miR-23a	MAGOHB	hsa-miR-107	BHLHE41
hsa-miR-23a	PRH2	hsa-miR-107	FAM60A
hsa-miR-23a	DDX47	hsa-miR-107	YARS2
hsa-miR-23a	HEBP1	hsa-miR-107	SYT10
hsa-miR-23a	KIAA1467	hsa-miR-107	KIF21A
hsa-miR-23a	AEBP2	hsa-miR-107	SLC2A13
hsa-miR-23a	GOLT1B	hsa-miR-107	YAF2
hsa-miR-23a	LDHB	hsa-miR-107	TWF1
hsa-miR-23a	ETNK1	hsa-miR-107	SCAF11
hsa-miR-23a	BCAT1	hsa-miR-107	RACGAP1
hsa-miR-23a	PPFIBP1	hsa-miR-107	ACCN2
hsa-miR-23a	KLHDC5	hsa-miR-107	SCN8A
hsa-miR-23a	PKP2	hsa-miR-107	KRT1
hsa-miR-23a	GXYLT1	hsa-miR-107	KRT78
hsa-miR-23a	TMEM117	hsa-miR-107	EIF4B
hsa-miR-23a	SLC38A1	hsa-miR-107	TARBP2
hsa-miR-23a	SLC38A2	hsa-miR-107	HOXC8
hsa-miR-23a	C12orf54	hsa-miR-107	ITGA5
hsa-miR-23a	PRKAG1	hsa-miR-107	KIAA0748
hsa-miR-23a	AQP2	hsa-miR-107	IKZF4
hsa-miR-23a	RACGAP1	hsa-miR-107	ANKRD52
hsa-miR-23a	C12orf62	hsa-miR-107	GLS2
hsa-miR-23a	SLC11A2	hsa-miR-107	BAZ2A
hsa-miR-23a	CSRNP2	hsa-miR-107	ZBTB39
hsa-miR-23a	SLC4A8	hsa-miR-107	LRP1
hsa-miR-23a	PRR13	hsa-miR-107	KIF5A
hsa-miR-23a	HOXC11	hsa-miR-107	OS9
hsa-miR-23a	ESYT1	hsa-miR-107	CYP27B1
hsa-miR-23a	TMEM194A	hsa-miR-107	USP15
hsa-miR-23a	INHBE	hsa-miR-107	SRGAP1
hsa-miR-23a	CPSF6	hsa-miR-107	HMGA2
hsa-miR-23a	LYZ	hsa-miR-107	DYRK2
hsa-miR-23a	RAB3IP	hsa-miR-107	CPSF6
hsa-miR-23a	CNOT2	hsa-miR-107	RAB3IP
hsa-miR-23a	PTPRB	hsa-miR-107	THAP2
hsa-miR-23a	LGR5	hsa-miR-107	E2F7
hsa-miR-23a	THAP2	hsa-miR-107	PAWR
hsa-miR-23a	TBC1D15	hsa-miR-107	CDK17
hsa-miR-23a	TRHDE	hsa-miR-107	CHPT1
hsa-miR-23a	PHLDA1	hsa-miR-107	TDG
hsa-miR-23a	OSBPL8	hsa-miR-107	CHST11
hsa-miR-23a	ZDHHC17	hsa-miR-107	KIAA1033
hsa-miR-23a	PPP1R12A	hsa-miR-107	NUAK1
hsa-miR-23a	ACSS3	hsa-miR-107	PRDM4
hsa-miR-23a	NTS	hsa-miR-107	GIT2
hsa-miR-23a	KITLG	hsa-miR-107	C12orf76
hsa-miR-23a	TMCC3	hsa-miR-107	PPP1CC
hsa-miR-23a	TMPO	hsa-miR-107	ATXN2
hsa-miR-23a	APAF1	hsa-miR-107	FBXO21
hsa-miR-23a	UHRF1BP1L	hsa-miR-107	RFC5
hsa-miR-23a	ANO4	hsa-miR-107	TRIAP1
hsa-miR-23a	GNPTAB	hsa-miR-107	RNF10
hsa-miR-23a	PAH	hsa-miR-107	CLIP1
hsa-miR-23a	HSP90B1	hsa-miR-107	DENR
hsa-miR-23a	TXNRD1	hsa-miR-107	TMED2
hsa-miR-23a	KIAA1033	hsa-miR-107	SLC15A4
hsa-miR-23a	NUAK1	hsa-miR-107	GLT1D1
hsa-miR-23a	C12orf23	hsa-miR-107	FZD10
hsa-miR-23a	BRAP	hsa-miR-107	RAN
hsa-miR-23a	TBX5	hsa-miR-107	ZNF268
hsa-miR-23a	PEBP1	hsa-miR-107	ZMYM2
hsa-miR-23a	MSI1	hsa-miR-107	XPO4
hsa-miR-23a	RNF10	hsa-miR-107	LATS2
hsa-miR-23a	CCDC62	hsa-miR-107	CDK8
hsa-miR-23a	SETD8	hsa-miR-107	GPR12
hsa-miR-23a	AACS	hsa-miR-107	MTUS2
hsa-miR-23a	PSPC1	hsa-miR-107	UBL3
hsa-miR-23a	ZMYM2	hsa-miR-107	DCLK1
hsa-miR-23a	WASF3	hsa-miR-107	AKAP11
hsa-miR-23a	SLC7A1	hsa-miR-107	C13orf30
hsa-miR-23a	UBL3	hsa-miR-107	HTR2A
hsa-miR-23a	N4BP2L1	hsa-miR-107	CDADC1
hsa-miR-23a	STARD13	hsa-miR-107	ARL11
hsa-miR-23a	DCLK1	hsa-miR-107	KPNA3
hsa-miR-23a	SPG20	hsa-miR-107	NEK5
hsa-miR-23a	UFM1	hsa-miR-107	VPS36
hsa-miR-23a	NAA16	hsa-miR-107	PCDH17
hsa-miR-23a	AKAP11	hsa-miR-107	PCDH9
hsa-miR-23a	KIAA1704	hsa-miR-107	SLITRK1
hsa-miR-23a	COG3	hsa-miR-107	GPC6
hsa-miR-23a	MED4	hsa-miR-107	MBNL2
hsa-miR-23a	RCBTB1	hsa-miR-107	ITGBL1
hsa-miR-23a	INTS6	hsa-miR-107	IRS2
hsa-miR-23a	PCDH17	hsa-miR-107	TUBGCP3
hsa-miR-23a	BORA	hsa-miR-107	ATP11A
hsa-miR-23a	KLF5	hsa-miR-107	CUL4A
hsa-miR-23a	KLF12	hsa-miR-107	JUB
hsa-miR-23a	COMMD6	hsa-miR-107	NOVA1
hsa-miR-23a	RBM26	hsa-miR-107	ARHGAP5
hsa-miR-23a	NDFIP2	hsa-miR-107	PPP2R3C
hsa-miR-23a	SPRY2	hsa-miR-107	MIPOL1
hsa-miR-23a	GPR180	hsa-miR-107	MIPOL1
hsa-miR-23a	HS6ST3	hsa-miR-107	PNN
hsa-miR-23a	IPO5	hsa-miR-107	FAM179B
hsa-miR-23a	ZIC5	hsa-miR-107	ARF6
hsa-miR-23a	C13orf27	hsa-miR-107	L2HGDH
hsa-miR-23a	IRS2	hsa-miR-107	SAV1
hsa-miR-23a	LAMP1	hsa-miR-107	NIN
hsa-miR-23a	GRTP1	hsa-miR-107	FERMT2
hsa-miR-23a	RNASE4	hsa-miR-107	SOCS4
hsa-miR-23a	SALL2	hsa-miR-107	MAPK1IP1L
hsa-miR-23a	C14orf126	hsa-miR-107	ATG14
hsa-miR-23a	CFL2	hsa-miR-107	C14orf101
hsa-miR-23a	NKX2-1	hsa-miR-107	EXOC5
hsa-miR-23a	PAX9	hsa-miR-107	C14orf105
hsa-miR-23a	MIPOL1	hsa-miR-107	ARID4A
hsa-miR-23a	MIPOL1	hsa-miR-107	PPM1A
hsa-miR-23a	FOXA1	hsa-miR-107	SIX4
hsa-miR-23a	SEC23A	hsa-miR-107	PLEK2
hsa-miR-23a	TRAPPC6B	hsa-miR-107	RDH11
hsa-miR-23a	FBXO33	hsa-miR-107	DCAF5
hsa-miR-23a	KLHL28	hsa-miR-107	KIAA0247
hsa-miR-23a	ARF6	hsa-miR-107	TTC9
hsa-miR-23a	NIN	hsa-miR-107	MAP3K9
hsa-miR-23a	GNG2	hsa-miR-107	NUMB
hsa-miR-23a	ERO1L	hsa-miR-107	VSX2
hsa-miR-23a	DDHD1	hsa-miR-107	KIAA0317
hsa-miR-23a	MAPK1IP1L	hsa-miR-107	TTLL5
hsa-miR-23a	C14orf135	hsa-miR-107	ANGEL1
hsa-miR-23a	SIX4	hsa-miR-107	ISM2
hsa-miR-23a	TRMT5	hsa-miR-107	GALC
hsa-miR-23a	TMEM30B	hsa-miR-107	PPP4R4
hsa-miR-23a	PPP2R5E	hsa-miR-107	DICER1
hsa-miR-23a	ZBTB1	hsa-miR-107	ATG2B
hsa-miR-23a	AKAP5	hsa-miR-107	C14orf129
hsa-miR-23a	MPP5	hsa-miR-107	PPP2R5C
hsa-miR-23a	VTI1B	hsa-miR-107	TECPR2
hsa-miR-23a	ERH	hsa-miR-107	RCOR1
hsa-miR-23a	COX16	hsa-miR-107	EXOC3L4
hsa-miR-23a	TTC9	hsa-miR-107	EIF5
hsa-miR-23a	RBM25	hsa-miR-107	CYFIP1
hsa-miR-23a	ENTPD5	hsa-miR-107	SNURF
hsa-miR-23a	ISCA2	hsa-miR-107	HERC2
hsa-miR-23a	TMED10	hsa-miR-107	TJP1
hsa-miR-23a	KIAA1737	hsa-miR-107	AVEN
hsa-miR-23a	NRXN3	hsa-miR-107	SLC12A6
hsa-miR-23a	TTC7B	hsa-miR-107	SPRED1
hsa-miR-23a	RPS6KA5	hsa-miR-107	C15orf54
hsa-miR-23a	BTBD7	hsa-miR-107	SERF2
hsa-miR-23a	PRIMA1	hsa-miR-107	SEMA6D
hsa-miR-23a	PPP4R4	hsa-miR-107	COPS2
hsa-miR-23a	ATG2B	hsa-miR-107	FGF7
hsa-miR-23a	BCL11B	hsa-miR-107	MYO5C
hsa-miR-23a	ZNF839	hsa-miR-107	PIGB
hsa-miR-23a	RCOR1	hsa-miR-107	RFX7
hsa-miR-23a	EXOC3L4	hsa-miR-107	FAM63B
hsa-miR-23a	EIF5	hsa-miR-107	RNF111
hsa-miR-23a	MTMR10	hsa-miR-107	FAM81A
hsa-miR-23a	SCG5	hsa-miR-107	GCNT3
hsa-miR-23a	GREM1	hsa-miR-107	TPM1
hsa-miR-23a	RYR3	hsa-miR-107	SPG21
hsa-miR-23a	GOLGA8B	hsa-miR-107	MAP2K1
hsa-miR-23a	C15orf41	hsa-miR-107	MAP2K5
hsa-miR-23a	MEIS2	hsa-miR-107	CORO2B
hsa-miR-23a	PAK6	hsa-miR-107	KIF23
hsa-miR-23a	RTF1	hsa-miR-107	ISLR
hsa-miR-23a	SPG11	hsa-miR-107	SCAMP5
hsa-miR-23a	GATM	hsa-miR-107	NEIL1
hsa-miR-23a	PLDN	hsa-miR-107	SCAPER
hsa-miR-23a	SEMA6D	hsa-miR-107	WDR61
hsa-miR-23a	MYEF2	hsa-miR-107	ADAMTSL3
hsa-miR-23a	SLC12A1	hsa-miR-107	ZNF592
hsa-miR-23a	FBN1	hsa-miR-107	AKAP13
hsa-miR-23a	CYP19A1	hsa-miR-107	ABHD2
hsa-miR-23a	TMOD3	hsa-miR-107	IQGAP1
hsa-miR-23a	PRTG	hsa-miR-107	FURIN
hsa-miR-23a	ALDH1A2	hsa-miR-107	MAN2A2
hsa-miR-23a	AQP9	hsa-miR-107	VPS33B
hsa-miR-23a	FAM63B	hsa-miR-107	CHD2
hsa-miR-23a	BNIP2	hsa-miR-107	IGF1R
hsa-miR-23a	RAB8B	hsa-miR-107	PCSK6
hsa-miR-23a	SNX22	hsa-miR-107	UBE2I
hsa-miR-23a	CSNK1G1	hsa-miR-107	TBC1D24
hsa-miR-23a	RBPMS2	hsa-miR-107	HMOX2
hsa-miR-23a	AAGAB	hsa-miR-107	C16orf72
hsa-miR-23a	GLCE	hsa-miR-107	MYH11
hsa-miR-23a	UACA	hsa-miR-107	UMOD
hsa-miR-23a	ARID3B	hsa-miR-107	DCUN1D3
hsa-miR-23a	CLK3	hsa-miR-107	UBFD1
hsa-miR-23a	UBE2Q2	hsa-miR-107	RBBP6
hsa-miR-23a	CIB2	hsa-miR-107	ARHGAP17
hsa-miR-23a	CHRNA5	hsa-miR-107	PRRT2
hsa-miR-23a	MTHFS	hsa-miR-107	PHKG2
hsa-miR-23a	MESDC2	hsa-miR-107	ITGAX
hsa-miR-23a	GOLGA6L9	hsa-miR-107	SHCBP1
hsa-miR-23a	AC010724.1	hsa-miR-107	N4BP1
hsa-miR-23a	BNC1	hsa-miR-107	SALL1
hsa-miR-23a	ZNF592	hsa-miR-107	RPGRIP1L
hsa-miR-23a	FANCI	hsa-miR-107	GNAO1
hsa-miR-23a	C15orf42	hsa-miR-107	CX3CL1
hsa-miR-23a	MESP1	hsa-miR-107	CIAPIN1
hsa-miR-23a	MAN2A2	hsa-miR-107	TK2
hsa-miR-23a	C15orf32	hsa-miR-107	DYNC1LI2
hsa-miR-23a	ARRDC4	hsa-miR-107	CBFB
hsa-miR-23a	FAHD1	hsa-miR-107	PLA2G15
hsa-miR-23a	CCNF	hsa-miR-107	SNTB2
hsa-miR-23a	PDPK1	hsa-miR-107	VPS4A
hsa-miR-23a	ZNF263	hsa-miR-107	ADAMTS18
hsa-miR-23a	SEPT12	hsa-miR-107	SDR42E1
hsa-miR-23a	GLYR1	hsa-miR-107	HSDL1
hsa-miR-23a	PDXDC1	hsa-miR-107	USP10
hsa-miR-23a	XYLT1	hsa-miR-107	KIAA0513
hsa-miR-23a	COQ7	hsa-miR-107	ABR
hsa-miR-23a	GPRC5B	hsa-miR-107	PITPNA
hsa-miR-23a	ERI2	hsa-miR-107	KIAA0664
hsa-miR-23a	DCUN1D3	hsa-miR-107	PLD2
hsa-miR-23a	RBBP6	hsa-miR-107	DLG4
hsa-miR-23a	TNRC6A	hsa-miR-107	TRAPPC1
hsa-miR-23a	IL21R	hsa-miR-107	NDEL1
hsa-miR-23a	ITGAL	hsa-miR-107	ZNF624
hsa-miR-23a	ZNF267	hsa-miR-107	FLOT2
hsa-miR-23a	N4BP1	hsa-miR-107	BLMH
hsa-miR-23a	ZNF423	hsa-miR-107	NF1
hsa-miR-23a	PAPD5	hsa-miR-107	SUZ12
hsa-miR-23a	TOX3	hsa-miR-107	ZNF207
hsa-miR-23a	RBL2	hsa-miR-107	CDK5R1
hsa-miR-23a	NUDT21	hsa-miR-107	CCL13
hsa-miR-23a	MT2A	hsa-miR-107	AATF
hsa-miR-23a	ZNF319	hsa-miR-107	PCGF2
hsa-miR-23a	CSNK2A2	hsa-miR-107	CDK12
hsa-miR-23a	CTCF	hsa-miR-107	RAPGEFL1
hsa-miR-23a	SLC7A6	hsa-miR-107	SMARCE1
hsa-miR-23a	CDH1	hsa-miR-107	CNTNAP1
hsa-miR-23a	TERF2	hsa-miR-107	EZH1
hsa-miR-23a	ZFHX3	hsa-miR-107	MPP2
hsa-miR-23a	CFDP1	hsa-miR-107	GPATCH8
hsa-miR-23a	MAF	hsa-miR-107	GFAP
hsa-miR-23a	ATMIN	hsa-miR-107	NMT1
hsa-miR-23a	CA5A	hsa-miR-107	FMNL1
hsa-miR-23a	PITPNA	hsa-miR-107	NSF
hsa-miR-23a	WSCD1	hsa-miR-107	TBKBP1
hsa-miR-23a	CTDNEP1	hsa-miR-107	PHB
hsa-miR-23a	C17orf81	hsa-miR-107	KAT7
hsa-miR-23a	CD68	hsa-miR-107	COL1A1
hsa-miR-23a	MYH4	hsa-miR-107	CHAD
hsa-miR-23a	MYH2	hsa-miR-107	KIF2B
hsa-miR-23a	MYH1	hsa-miR-107	HLF
hsa-miR-23a	ZNF287	hsa-miR-107	MMD
hsa-miR-23a	SLC5A10	hsa-miR-107	SRSF1
hsa-miR-23a	NLK	hsa-miR-107	MTMR4
hsa-miR-23a	PIGS	hsa-miR-107	PPM1E
hsa-miR-23a	DHRS13	hsa-miR-107	RPS6KB1
hsa-miR-23a	NUFIP2	hsa-miR-107	TLK2
hsa-miR-23a	SSH2	hsa-miR-107	MAP3K3
hsa-miR-23a	NSRP1	hsa-miR-107	STRADA
hsa-miR-23a	CPD	hsa-miR-107	CCDC47
hsa-miR-23a	CRLF3	hsa-miR-107	AXIN2
hsa-miR-23a	RNF135	hsa-miR-107	HELZ
hsa-miR-23a	CCL7	hsa-miR-107	PRKAR1A
hsa-miR-23a	CCL13	hsa-miR-107	KCNJ2
hsa-miR-23a	SLC35G3	hsa-miR-107	GGA3
hsa-miR-23a	SLFN12	hsa-miR-107	LLGL2
hsa-miR-23a	GGNBP2	hsa-miR-107	UBE2O
hsa-miR-23a	DHRS11	hsa-miR-107	BAIAP2
hsa-miR-23a	SYNRG	hsa-miR-107	DUS1L
hsa-miR-23a	PIP4K2B	hsa-miR-107	FASN
hsa-miR-23a	CWC25	hsa-miR-107	ADCYAP1
hsa-miR-23a	LASP1	hsa-miR-107	METTL4
hsa-miR-23a	TCAP	hsa-miR-107	PTPRM
hsa-miR-23a	STAT5B	hsa-miR-107	PPP4R1
hsa-miR-23a	FAM134C	hsa-miR-107	AFG3L2
hsa-miR-23a	MPP2	hsa-miR-107	RNMT
hsa-miR-23a	HEXIM1	hsa-miR-107	MIB1
hsa-miR-23a	HOXB4	hsa-miR-107	KCTD1
hsa-miR-23a	HOXB5	hsa-miR-107	DSC3
hsa-miR-23a	HOXB9	hsa-miR-107	RNF125
hsa-miR-23a	MBTD1	hsa-miR-107	C18orf34
hsa-miR-23a	TOM1L1	hsa-miR-107	DTNA
hsa-miR-23a	SRSF1	hsa-miR-107	SYT4
hsa-miR-23a	RNF43	hsa-miR-107	RNF165
hsa-miR-23a	VMP1	hsa-miR-107	SMAD7
hsa-miR-23a	MRC2	hsa-miR-107	MYO5B
hsa-miR-23a	HELZ	hsa-miR-107	SKA1
hsa-miR-23a	SLC16A6	hsa-miR-107	ST8SIA3
hsa-miR-23a	ABCA8	hsa-miR-107	ZCCHC2
hsa-miR-23a	ABCA10	hsa-miR-107	SERPINB5
hsa-miR-23a	WBP2	hsa-miR-107	SOCS6
hsa-miR-23a	MRPL38	hsa-miR-107	TCF3
hsa-miR-23a	UBE2O	hsa-miR-107	CSNK1G2
hsa-miR-23a	SEC14L1	hsa-miR-107	FSD1
hsa-miR-23a	CBX2	hsa-miR-107	RANBP3
hsa-miR-23a	ZNF750	hsa-miR-107	ACSBG2
hsa-miR-23a	CETN1	hsa-miR-107	INSR
hsa-miR-23a	C18orf56	hsa-miR-107	CARM1
hsa-miR-23a	YES1	hsa-miR-107	C19orf80
hsa-miR-23a	ADCYAP1	hsa-miR-107	ZNF627
hsa-miR-23a	MYL12B	hsa-miR-107	LPHN1
hsa-miR-23a	TGIF1	hsa-miR-107	MED26
hsa-miR-23a	VAPA	hsa-miR-107	ELL
hsa-miR-23a	SEH1L	hsa-miR-107	CCNE1
hsa-miR-23a	ANKRD29	hsa-miR-107	ZNF382
hsa-miR-23a	ZNF521	hsa-miR-107	CAPN12
hsa-miR-23a	SS18	hsa-miR-107	SPTBN4
hsa-miR-23a	DSC2	hsa-miR-107	CEACAM7
hsa-miR-23a	NOL4	hsa-miR-107	KCNN4
hsa-miR-23a	DTNA	hsa-miR-107	ZNF223
hsa-miR-23a	GALNT1	hsa-miR-107	CLASRP
hsa-miR-23a	RPRD1A	hsa-miR-107	EXOC3L2
hsa-miR-23a	SYT4	hsa-miR-107	DMPK
hsa-miR-23a	MYO5B	hsa-miR-107	SLC8A2
hsa-miR-23a	SKA1	hsa-miR-107	TPRX1
hsa-miR-23a	SMAD4	hsa-miR-107	ZNF548
hsa-miR-23a	MEX3C	hsa-miR-107	ZSCAN22
hsa-miR-23a	RAB27B	hsa-miR-107	YWHAQ
hsa-miR-23a	ONECUT2	hsa-miR-107	PDIA6
hsa-miR-23a	NEDD4L	hsa-miR-107	PQLC3
hsa-miR-23a	KIAA1468	hsa-miR-107	LAPTM4A
hsa-miR-23a	ZCCHC2	hsa-miR-107	RAB10
hsa-miR-23a	BCL2	hsa-miR-107	EPT1
hsa-miR-23a	SERPINB7	hsa-miR-107	MAPRE3
hsa-miR-23a	TMX3	hsa-miR-107	NRBP1
hsa-miR-23a	SOCS6	hsa-miR-107	FNDC4
hsa-miR-23a	PARD6G	hsa-miR-107	XDH
hsa-miR-23a	ZNF77	hsa-miR-107	FAM98A
hsa-miR-23a	SAFB2	hsa-miR-107	CRIM1
hsa-miR-23a	SAFB	hsa-miR-107	ATL2
hsa-miR-23a	NDUFA7	hsa-miR-107	LRPPRC
hsa-miR-23a	ZNF559	hsa-miR-107	SLC3A1
hsa-miR-23a	ZNF560	hsa-miR-107	PRKCE
hsa-miR-23a	ZNF121	hsa-miR-107	SOCS5
hsa-miR-23a	S1PR5	hsa-miR-107	KLRAQ1
hsa-miR-23a	PRKCSH	hsa-miR-107	SMEK2
hsa-miR-23a	ZNF136	hsa-miR-107	BCL11A
hsa-miR-23a	HOOK2	hsa-miR-107	XPO1
hsa-miR-23a	NACC1	hsa-miR-107	SLC1A4
hsa-miR-23a	EMR2	hsa-miR-107	ACTR2
hsa-miR-23a	PDE4C	hsa-miR-107	ANTXR1
hsa-miR-23a	ZNF90	hsa-miR-107	C2orf42
hsa-miR-23a	ZNF626	hsa-miR-107	SMYD5
hsa-miR-23a	ZNF85	hsa-miR-107	FAM176A
hsa-miR-23a	ZNF708	hsa-miR-107	KCMF1
hsa-miR-23a	ZNF493	hsa-miR-107	VAMP8
hsa-miR-23a	ZNF100	hsa-miR-107	REEP1
hsa-miR-23a	ZNF43	hsa-miR-107	LMAN2L
hsa-miR-23a	ZNF208	hsa-miR-107	NPAS2
hsa-miR-23a	ZNF676	hsa-miR-107	IL18R1
hsa-miR-23a	ZNF91	hsa-miR-107	GCC2
hsa-miR-23a	ZNF254	hsa-miR-107	ANKRD57
hsa-miR-23a	UQCRFS1	hsa-miR-107	RGPD5
hsa-miR-23a	TSHZ3	hsa-miR-107	RGPD6
hsa-miR-23a	ZNF30	hsa-miR-107	BCL2L11
hsa-miR-23a	ZNF382	hsa-miR-107	TTL
hsa-miR-23a	ZNF461	hsa-miR-107	DDX18
hsa-miR-23a	ZNF420	hsa-miR-107	PTPN4
hsa-miR-23a	ZNF781	hsa-miR-107	SAP130
hsa-miR-23a	ZNF546	hsa-miR-107	CCNT2
hsa-miR-23a	EGLN2	hsa-miR-107	RAB3GAP1
hsa-miR-23a	ZNF230	hsa-miR-107	LRP1B
hsa-miR-23a	PNMAL1	hsa-miR-107	ACVR2A
hsa-miR-23a	CARD8	hsa-miR-107	KIF5C
hsa-miR-23a	ZNF114	hsa-miR-107	GALNT13
hsa-miR-23a	VRK3	hsa-miR-107	COBLL1
hsa-miR-23a	ZNF473	hsa-miR-107	SCN3A
hsa-miR-23a	ZNF480	hsa-miR-107	SCN2A
hsa-miR-23a	ZNF701	hsa-miR-107	SCN1A
hsa-miR-23a	ZNF28	hsa-miR-107	SCN7A
hsa-miR-23a	ZNF468	hsa-miR-107	LRP2
hsa-miR-23a	ZNF765	hsa-miR-107	UBR3
hsa-miR-23a	ZNF813	hsa-miR-107	SP5
hsa-miR-23a	COX6B2	hsa-miR-107	GAD1
hsa-miR-23a	IL11	hsa-miR-107	GORASP2
hsa-miR-23a	ZNF579	hsa-miR-107	TLK1
hsa-miR-23a	ZNF776	hsa-miR-107	UBE2E3
hsa-miR-23a	ZNF587	hsa-miR-107	NEUROD1
hsa-miR-23a	ZNF417	hsa-miR-107	ASNSD1
hsa-miR-23a	ZSCAN18	hsa-miR-107	HSPE1
hsa-miR-23a	ZNF274	hsa-miR-107	PHOCN
hsa-miR-23a	ZNF544	hsa-miR-107	SATB2
hsa-miR-23a	SH3YL1	hsa-miR-107	SPATS2L
hsa-miR-23a	SOX11	hsa-miR-107	STRADB
hsa-miR-23a	MBOAT2	hsa-miR-107	TMEM237
hsa-miR-23a	KLF11	hsa-miR-107	FAM117B
hsa-miR-23a	PDIA6	hsa-miR-107	ABI2
hsa-miR-23a	E2F6	hsa-miR-107	CD28
hsa-miR-23a	LPIN1	hsa-miR-107	NRP2
hsa-miR-23a	VSNL1	hsa-miR-107	PTH2R
hsa-miR-23a	PUM2	hsa-miR-107	ERBB4
hsa-miR-23a	NCOA1	hsa-miR-107	CTDSP1
hsa-miR-23a	KCNK3	hsa-miR-107	PRKAG3
hsa-miR-23a	PPP1CB	hsa-miR-107	IHH
hsa-miR-23a	FAM98A	hsa-miR-107	FAM134A
hsa-miR-23a	MAP4K3	hsa-miR-107	ATG9A
hsa-miR-23a	PKDCC	hsa-miR-107	COL4A4
hsa-miR-23a	LRPPRC	hsa-miR-107	COL4A3
hsa-miR-23a	EPAS1	hsa-miR-107	AGFG1
hsa-miR-23a	MCFD2	hsa-miR-107	PID1
hsa-miR-23a	FBXO11	hsa-miR-107	CAB39
hsa-miR-23a	NRXN1	hsa-miR-107	SAG
hsa-miR-23a	SPTBN1	hsa-miR-107	ARL4C
hsa-miR-23a	SMEK2	hsa-miR-107	SH3BP4
hsa-miR-23a	BCL11A	hsa-miR-107	ASB1
hsa-miR-23a	PAPOLG	hsa-miR-107	FKBP1A
hsa-miR-23a	MEIS1	hsa-miR-107	PDYN
hsa-miR-23a	TIA1	hsa-miR-107	TGM3
hsa-miR-23a	SMYD5	hsa-miR-107	GPCPD1
hsa-miR-23a	MOGS	hsa-miR-107	PLCB1
hsa-miR-23a	C2orf3	hsa-miR-107	NAA20
hsa-miR-23a	C2orf89	hsa-miR-107	SYNDIG1
hsa-miR-23a	MAT2A	hsa-miR-107	ABHD12
hsa-miR-23a	GGCX	hsa-miR-107	KIF3B
hsa-miR-23a	REEP1	hsa-miR-107	MAPRE1
hsa-miR-23a	RGPD1	hsa-miR-107	BPIFB4
hsa-miR-23a	RPIA	hsa-miR-107	PXMP4
hsa-miR-23a	ZNF514	hsa-miR-107	TRPC4AP
hsa-miR-23a	FAM178B	hsa-miR-107	MMP24
hsa-miR-23a	MGAT4A	hsa-miR-107	PHF20
hsa-miR-23a	CHST10	hsa-miR-107	TGIF2
hsa-miR-23a	MAP4K4	hsa-miR-107	ZHX3
hsa-miR-23a	TMEM182	hsa-miR-107	CHD6
hsa-miR-23a	ANKRD57	hsa-miR-107	JPH2
hsa-miR-23a	SLC20A1	hsa-miR-107	WFDC5
hsa-miR-23a	IL1F10	hsa-miR-107	ZSWIM3
hsa-miR-23a	CYP27C1	hsa-miR-107	CD40
hsa-miR-23a	FAM168B	hsa-miR-107	ELMO2
hsa-miR-23a	CCNT2	hsa-miR-107	ZNFX1
hsa-miR-23a	R3HDM1	hsa-miR-107	ADNP
hsa-miR-23a	MCM6	hsa-miR-107	SALL4
hsa-miR-23a	SPOPL	hsa-miR-107	YTHDF1
hsa-miR-23a	TNFAIP6	hsa-miR-107	USP25
hsa-miR-23a	NEB	hsa-miR-107	KRTAP11-1
hsa-miR-23a	GALNT13	hsa-miR-107	SYNJ1
hsa-miR-23a	PKP4	hsa-miR-107	ITSN1
hsa-miR-23a	BAZ2B	hsa-miR-107	RCAN1
hsa-miR-23a	TLK1	hsa-miR-107	CECR6
hsa-miR-23a	CYBRD1	hsa-miR-107	BCL2L13
hsa-miR-23a	DLX1	hsa-miR-107	HIRA
hsa-miR-23a	GPR155	hsa-miR-107	MRPL40
hsa-miR-23a	HOXD13	hsa-miR-107	MED15
hsa-miR-23a	HOXD10	hsa-miR-107	CRKL
hsa-miR-23a	RBM45	hsa-miR-107	HIC2
hsa-miR-23a	CALCRL	hsa-miR-107	UBE2L3
hsa-miR-23a	ORMDL1	hsa-miR-107	MN1
hsa-miR-23a	C2orf88	hsa-miR-107	MTMR3
hsa-miR-23a	HIBCH	hsa-miR-107	YWHAH
hsa-miR-23a	GLS	hsa-miR-107	MYH9
hsa-miR-23a	SLC39A10	hsa-miR-107	CYTH4
hsa-miR-23a	SATB2	hsa-miR-107	SUN2
hsa-miR-23a	C2orf69	hsa-miR-107	ST13
hsa-miR-23a	FAM126B	hsa-miR-107	ZC3H7B
hsa-miR-23a	TRAK2	hsa-miR-107	SEPT3
hsa-miR-23a	FAM117B	hsa-miR-107	POLDIP3
hsa-miR-23a	ABI2	hsa-miR-107	NUP50
hsa-miR-23a	FZD5	hsa-miR-107	PPP6R2
hsa-miR-23a	IDH1	hsa-miR-107	CNTN4
hsa-miR-23a	PIKFYVE	hsa-miR-107	ITPR1
hsa-miR-23a	LANCL1	hsa-miR-107	BHLHE40
hsa-miR-23a	ERBB4	hsa-miR-107	ARL8B
hsa-miR-23a	IKZF2	hsa-miR-107	GRM7
hsa-miR-23a	CXCR2	hsa-miR-107	CAV3
hsa-miR-23a	CUL3	hsa-miR-107	ATP2B2
hsa-miR-23a	COL4A4	hsa-miR-107	SYN2
hsa-miR-23a	SPHKAP	hsa-miR-107	RPL32
hsa-miR-23a	DNER	hsa-miR-107	WNT7A
hsa-miR-23a	CAB39	hsa-miR-107	SH3BP5
hsa-miR-23a	SPP2	hsa-miR-107	DAZL
hsa-miR-23a	SIRPA	hsa-miR-107	NR1D2
hsa-miR-23a	ATRN	hsa-miR-107	RARB
hsa-miR-23a	CHGB	hsa-miR-107	NEK10
hsa-miR-23a	JAG1	hsa-miR-107	ARPP21
hsa-miR-23a	ISM1	hsa-miR-107	TRANK1
hsa-miR-23a	KIF16B	hsa-miR-107	LRRFIP2
hsa-miR-23a	SNX5	hsa-miR-107	ACVR2B
hsa-miR-23a	POLR3F	hsa-miR-107	HIGD1A
hsa-miR-23a	SEC23B	hsa-miR-107	ZNF662
hsa-miR-23a	CD93	hsa-miR-107	SNRK
hsa-miR-23a	GZF1	hsa-miR-107	C3orf23
hsa-miR-23a	MAPRE1	hsa-miR-107	ZDHHC3
hsa-miR-23a	NCOA6	hsa-miR-107	SACM1L
hsa-miR-23a	BLCAP	hsa-miR-107	MAP4
hsa-miR-23a	TOP1	hsa-miR-107	ARIH2
hsa-miR-23a	SRSF6	hsa-miR-107	USP19
hsa-miR-23a	C20orf111	hsa-miR-107	CAMKV
hsa-miR-23a	STK4	hsa-miR-107	RBM6
hsa-miR-23a	SYS1	hsa-miR-107	WDR82
hsa-miR-23a	CSE1L	hsa-miR-107	ERC2
hsa-miR-23a	B4GALT5	hsa-miR-107	ARF4
hsa-miR-23a	PARD6B	hsa-miR-107	ADAMTS9
hsa-miR-23a	ADNP	hsa-miR-107	FOXP1
hsa-miR-23a	CTCFL	hsa-miR-107	RYBP
hsa-miR-23a	SLMO2	hsa-miR-107	CNTN3
hsa-miR-23a	C20orf11	hsa-miR-107	CGGBP1
hsa-miR-23a	RP4-697K14.7	hsa-miR-107	ZNF654
hsa-miR-23a	PCMTD2	hsa-miR-107	EPHA3
hsa-miR-23a	ADAMTS5	hsa-miR-107	DCBLD2
hsa-miR-23a	SCAF4	hsa-miR-107	CD47
hsa-miR-23a	HUNK	hsa-miR-107	DZIP3
hsa-miR-23a	MIS18A	hsa-miR-107	BTLA
hsa-miR-23a	SYNJ1	hsa-miR-107	KIAA2018
hsa-miR-23a	CLIC6	hsa-miR-107	POGLUT1
hsa-miR-23a	MORC3	hsa-miR-107	CD80
hsa-miR-23a	CLDN14	hsa-miR-107	KPNA1
hsa-miR-23a	COL6A1	hsa-miR-107	SEMA5B
hsa-miR-23a	MCM3AP	hsa-miR-107	PTPLB
hsa-miR-23a	XKR3	hsa-miR-107	MYLK
hsa-miR-23a	ATP6V1E1	hsa-miR-107	KALRN
hsa-miR-23a	PRAME	hsa-miR-107	ACAD9
hsa-miR-23a	NEFH	hsa-miR-107	KIAA1257
hsa-miR-23a	HMGXB4	hsa-miR-107	STAG1
hsa-miR-23a	RPS19BP1	hsa-miR-107	ARMC8
hsa-miR-23a	NHP2L1	hsa-miR-107	PLS1
hsa-miR-23a	SEPT3	hsa-miR-107	TRPC1
hsa-miR-23a	WBP2NL	hsa-miR-107	PLSCR4
hsa-miR-23a	TCF20	hsa-miR-107	ZIC1
hsa-miR-23a	NUP50	hsa-miR-107	TM4SF1
hsa-miR-23a	TTC38	hsa-miR-107	RNF13
hsa-miR-23a	ZBED4	hsa-miR-107	MBNL1
hsa-miR-23a	CHL1	hsa-miR-107	RAP2B
hsa-miR-23a	TRNT1	hsa-miR-107	TRIM59
hsa-miR-23a	CRBN	hsa-miR-107	NMD3
hsa-miR-23a	SRGAP3	hsa-miR-107	PDCD10
hsa-miR-23a	THUMPD3	hsa-miR-107	MYNN
hsa-miR-23a	CRELD1	hsa-miR-107	NLGN1
hsa-miR-23a	IQSEC1	hsa-miR-107	TBL1XR1
hsa-miR-23a	EAF1	hsa-miR-107	KLHL6
hsa-miR-23a	OXNAD1	hsa-miR-107	CCDC50
hsa-miR-23a	SATB1	hsa-miR-107	FGF12
hsa-miR-23a	KAT2B	hsa-miR-107	ATP13A4
hsa-miR-23a	SGOL1	hsa-miR-107	LRRC15
hsa-miR-23a	TOP2B	hsa-miR-107	ATP13A3
hsa-miR-23a	SLC4A7	hsa-miR-107	FGFRL1
hsa-miR-23a	AZI2	hsa-miR-107	WHSC1
hsa-miR-23a	TGFBR2	hsa-miR-107	MXD4
hsa-miR-23a	CRTAP	hsa-miR-107	ZFYVE28
hsa-miR-23a	TRANK1	hsa-miR-107	ZFYVE28
hsa-miR-23a	ACAA1	hsa-miR-107	ADD1
hsa-miR-23a	CCK	hsa-miR-107	AC110814.1
hsa-miR-23a	SS18L2	hsa-miR-107	CPEB2
hsa-miR-23a	SNRK	hsa-miR-107	BST1
hsa-miR-23a	LZTFL1	hsa-miR-107	LCORL
hsa-miR-23a	SMARCC1	hsa-miR-107	SEL1L3
hsa-miR-23a	MAP4	hsa-miR-107	TBC1D19
hsa-miR-23a	PFKFB4	hsa-miR-107	C4orf19
hsa-miR-23a	NDUFAF3	hsa-miR-107	ATP8A1
hsa-miR-23a	CCDC36	hsa-miR-107	KCTD8
hsa-miR-23a	TUSC2	hsa-miR-107	GABRB1
hsa-miR-23a	DOCK3	hsa-miR-107	SLAIN2
hsa-miR-23a	NISCH	hsa-miR-107	FRYL
hsa-miR-23a	PBRM1	hsa-miR-107	DCUN1D4
hsa-miR-23a	CACNA2D3	hsa-miR-107	CLOCK
hsa-miR-23a	FAM116A	hsa-miR-107	SRP72
hsa-miR-23a	SLMAP	hsa-miR-107	LPHN3
hsa-miR-23a	ABHD6	hsa-miR-107	YTHDC1
hsa-miR-23a	LRIG1	hsa-miR-107	AMTN
hsa-miR-23a	KBTBD8	hsa-miR-107	SLC4A4
hsa-miR-23a	C3orf64	hsa-miR-107	SHROOM3
hsa-miR-23a	EIF4E3	hsa-miR-107	CNOT6L
hsa-miR-23a	RYBP	hsa-miR-107	HSD17B13
hsa-miR-23a	ROBO2	hsa-miR-107	TSPAN5
hsa-miR-23a	ROBO1	hsa-miR-107	DAPP1
hsa-miR-23a	VGLL3	hsa-miR-107	HADH
hsa-miR-23a	HTR1F	hsa-miR-107	FGF2
hsa-miR-23a	CGGBP1	hsa-miR-107	SPRY1
hsa-miR-23a	ZNF654	hsa-miR-107	FAT4
hsa-miR-23a	C3orf38	hsa-miR-107	HSPA4L
hsa-miR-23a	EPHA3	hsa-miR-107	LARP1B
hsa-miR-23a	CPOX	hsa-miR-107	PGRMC2
hsa-miR-23a	DCBLD2	hsa-miR-107	PHF17
hsa-miR-23a	PCNP	hsa-miR-107	NAA15
hsa-miR-23a	ZBTB11	hsa-miR-107	SCOC
hsa-miR-23a	ZPLD1	hsa-miR-107	IL15
hsa-miR-23a	ZPLD1	hsa-miR-107	OTUD4
hsa-miR-23a	C3orf52	hsa-miR-107	POU4F2
hsa-miR-23a	SPICE1	hsa-miR-107	FBXW7
hsa-miR-23a	NAA50	hsa-miR-107	NPY2R
hsa-miR-23a	GAP43	hsa-miR-107	TRIM61
hsa-miR-23a	POGLUT1	hsa-miR-107	TMEM192
hsa-miR-23a	IQCB1	hsa-miR-107	CLCN3
hsa-miR-23a	KPNA1	hsa-miR-107	GALNT7
hsa-miR-23a	TOPBP1	hsa-miR-107	CASP3
hsa-miR-23a	CEP63	hsa-miR-107	ACSL1
hsa-miR-23a	PPP2R3A	hsa-miR-107	MYO10
hsa-miR-23a	MSL2	hsa-miR-107	RAI14
hsa-miR-23a	ARMC8	hsa-miR-107	GHR
hsa-miR-23a	SLC25A36	hsa-miR-107	ITGA2
hsa-miR-23a	SPSB4	hsa-miR-107	SLC38A9
hsa-miR-23a	XRN1	hsa-miR-107	PDE4D
hsa-miR-23a	PAQR9	hsa-miR-107	ADAMTS6
hsa-miR-23a	ZIC4	hsa-miR-107	PIK3R1
hsa-miR-23a	ZIC1	hsa-miR-107	TNPO1
hsa-miR-23a	AADAC	hsa-miR-107	F2RL1
hsa-miR-23a	MBNL1	hsa-miR-107	VCAN
hsa-miR-23a	RAP2B	hsa-miR-107	RGMB
hsa-miR-23a	KCNAB1	hsa-miR-107	CHD1
hsa-miR-23a	SSR3	hsa-miR-107	PPIP5K2
hsa-miR-23a	TIPARP	hsa-miR-107	C5orf13
hsa-miR-23a	KPNA4	hsa-miR-107	FEM1C
hsa-miR-23a	SPTSSB	hsa-miR-107	AC010282.1
hsa-miR-23a	SI	hsa-miR-107	SEMA6A
hsa-miR-23a	MYNN	hsa-miR-107	MARCH3
hsa-miR-23a	GNB4	hsa-miR-107	CDC42SE2
hsa-miR-23a	ATP11B	hsa-miR-107	RAPGEF6
hsa-miR-23a	PARL	hsa-miR-107	SEPT8
hsa-miR-23a	ABCC5	hsa-miR-107	AFF4
hsa-miR-23a	LIPH	hsa-miR-107	FSTL4
hsa-miR-23a	HRG	hsa-miR-107	UBE2B
hsa-miR-23a	LPP	hsa-miR-107	SEC24A
hsa-miR-23a	ACAP2	hsa-miR-107	C5orf24
hsa-miR-23a	RNF168	hsa-miR-107	SLC23A1
hsa-miR-23a	PAK2	hsa-miR-107	PSD2
hsa-miR-23a	ZNF141	hsa-miR-107	PURA
hsa-miR-23a	ZNF721	hsa-miR-107	PCDHA6
hsa-miR-23a	WHSC1	hsa-miR-107	PCDHA9
hsa-miR-23a	NKX3-2	hsa-miR-107	FCHSD1
hsa-miR-23a	BOD1L	hsa-miR-107	DPYSL3
hsa-miR-23a	TAPT1	hsa-miR-107	JAKMIP2
hsa-miR-23a	KCNIP4	hsa-miR-107	HTR4
hsa-miR-23a	PPARGC1A	hsa-miR-107	SH3TC2
hsa-miR-23a	DHX15	hsa-miR-107	CSNK1A1
hsa-miR-23a	KLF3	hsa-miR-107	DCTN4
hsa-miR-23a	RBM47	hsa-miR-107	ITK
hsa-miR-23a	ATP8A1	hsa-miR-107	GABRG2
hsa-miR-23a	GABRG1	hsa-miR-107	NUDCD2
hsa-miR-23a	SPATA18	hsa-miR-107	C5orf41
hsa-miR-23a	USP46	hsa-miR-107	DRD1
hsa-miR-23a	EXOC1	hsa-miR-107	FAF2
hsa-miR-23a	AASDH	hsa-miR-107	UNC5A
hsa-miR-23a	PPAT	hsa-miR-107	EXOC2
hsa-miR-23a	UBA6	hsa-miR-107	PRPF4B
hsa-miR-23a	GNRHR	hsa-miR-107	NRN1
hsa-miR-23a	TMPRSS11D	hsa-miR-107	NEDD9
hsa-miR-23a	TMPRSS11E	hsa-miR-107	JARID2
hsa-miR-23a	UGT2B15	hsa-miR-107	ATXN1
hsa-miR-23a	CSN3	hsa-miR-107	RBM24
hsa-miR-23a	SLC4A4	hsa-miR-107	MBOAT1
hsa-miR-23a	ADAMTS3	hsa-miR-107	CDKAL1
hsa-miR-23a	ANKRD17	hsa-miR-107	BTN1A1
hsa-miR-23a	CXCL5	hsa-miR-107	ABCF1
hsa-miR-23a	RCHY1	hsa-miR-107	IP6K3
hsa-miR-23a	THAP6	hsa-miR-107	HMGA1
hsa-miR-23a	CDKL2	hsa-miR-107	SNRPC
hsa-miR-23a	G3BP2	hsa-miR-107	STK38
hsa-miR-23a	USO1	hsa-miR-107	SRSF3
hsa-miR-23a	STBD1	hsa-miR-107	PPIL1
hsa-miR-23a	CNOT6L	hsa-miR-107	PIM1
hsa-miR-23a	LIN54	hsa-miR-107	TMEM217
hsa-miR-23a	AGPAT9	hsa-miR-107	RNF8
hsa-miR-23a	PPM1K	hsa-miR-107	APOBEC2
hsa-miR-23a	NAP1L5	hsa-miR-107	MED20
hsa-miR-23a	SMARCAD1	hsa-miR-107	GTPBP2
hsa-miR-23a	PDLIM5	hsa-miR-107	VEGFA
hsa-miR-23a	METAP1	hsa-miR-107	ENPP4
hsa-miR-23a	ADH5	hsa-miR-107	TFAP2D
hsa-miR-23a	UBE2D3	hsa-miR-107	MLIP
hsa-miR-23a	ELOVL6	hsa-miR-107	BAI3
hsa-miR-23a	SYNPO2	hsa-miR-107	C6orf57
hsa-miR-23a	USP53	hsa-miR-107	RIMS1
hsa-miR-23a	KIAA1109	hsa-miR-107	COL12A1
hsa-miR-23a	FGF2	hsa-miR-107	PHIP
hsa-miR-23a	ANKRD50	hsa-miR-107	RNGTT
hsa-miR-23a	INTU	hsa-miR-107	BACH2
hsa-miR-23a	SLC25A31	hsa-miR-107	EPHA7
hsa-miR-23a	C4orf29	hsa-miR-107	GPR63
hsa-miR-23a	PGRMC2	hsa-miR-107	POU3F2
hsa-miR-23a	ELF2	hsa-miR-107	PNISR
hsa-miR-23a	NDUFC1	hsa-miR-107	MCHR2
hsa-miR-23a	NAA15	hsa-miR-107	ASCC3
hsa-miR-23a	TBC1D9	hsa-miR-107	AIM1
hsa-miR-23a	POU4F2	hsa-miR-107	OSTM1
hsa-miR-23a	MAB21L2	hsa-miR-107	SNX3
hsa-miR-23a	ARFIP1	hsa-miR-107	SESN1
hsa-miR-23a	TRIM2	hsa-miR-107	GPR6
hsa-miR-23a	KIAA0922	hsa-miR-107	C6orf204
hsa-miR-23a	LRAT	hsa-miR-107	RNF217
hsa-miR-23a	TMEM144	hsa-miR-107	RSPO3
hsa-miR-23a	RAPGEF2	hsa-miR-107	ARHGAP18
hsa-miR-23a	MARCH1	hsa-miR-107	TBPL1
hsa-miR-23a	SC4MOL	hsa-miR-107	SGK1
hsa-miR-23a	ANXA10	hsa-miR-107	ALDH8A1
hsa-miR-23a	PALLD	hsa-miR-107	MYB
hsa-miR-23a	CLCN3	hsa-miR-107	BCLAF1
hsa-miR-23a	HMGB2	hsa-miR-107	HECA
hsa-miR-23a	CEP44	hsa-miR-107	PHACTR2
hsa-miR-23a	HPGD	hsa-miR-107	PLAGL1
hsa-miR-23a	WWC2	hsa-miR-107	TAB2
hsa-miR-23a	IRF2	hsa-miR-107	PPIL4
hsa-miR-23a	SLC25A4	hsa-miR-107	LATS1
hsa-miR-23a	PAPD7	hsa-miR-107	PCMT1
hsa-miR-23a	FASTKD3	hsa-miR-107	MTHFD1L
hsa-miR-23a	RAI14	hsa-miR-107	AKAP12
hsa-miR-23a	RAD1	hsa-miR-107	ESR1
hsa-miR-23a	SLC1A3	hsa-miR-107	SYNE1
hsa-miR-23a	C5orf42	hsa-miR-107	TIAM2
hsa-miR-23a	FYB	hsa-miR-107	MAP3K4
hsa-miR-23a	PTGER4	hsa-miR-107	QKI
hsa-miR-23a	TTC33	hsa-miR-107	C6orf120
hsa-miR-23a	PLCXD3	hsa-miR-107	DLL1
hsa-miR-23a	FBXO4	hsa-miR-107	MAFK
hsa-miR-23a	HMGCS1	hsa-miR-107	MMD2
hsa-miR-23a	MOCS2	hsa-miR-107	RBAK
hsa-miR-23a	ESM1	hsa-miR-107	FBXL18
hsa-miR-23a	MAP3K1	hsa-miR-107	USP42
hsa-miR-23a	MIER3	hsa-miR-107	MIOS
hsa-miR-23a	GPBP1	hsa-miR-107	THSD7A
hsa-miR-23a	SREK1IP1	hsa-miR-107	MEOX2
hsa-miR-23a	ADAMTS6	hsa-miR-107	ANKMY2
hsa-miR-23a	ERBB2IP	hsa-miR-107	RAPGEF5
hsa-miR-23a	SMN2	hsa-miR-107	ZNRF2
hsa-miR-23a	SMN1	hsa-miR-107	NOD1
hsa-miR-23a	MAP1B	hsa-miR-107	PURB
hsa-miR-23a	TNPO1	hsa-miR-107	CACNA2D1
hsa-miR-23a	FCHO2	hsa-miR-107	SEMA3D
hsa-miR-23a	ENC1	hsa-miR-107	GTPBP10
hsa-miR-23a	F2R	hsa-miR-107	CDK14
hsa-miR-23a	AGGF1	hsa-miR-107	ANKIB1
hsa-miR-23a	TBCA	hsa-miR-107	CDK6
hsa-miR-23a	LHFPL2	hsa-miR-107	PDK4
hsa-miR-23a	SSBP2	hsa-miR-107	DYNC1I1
hsa-miR-23a	CCNH	hsa-miR-107	DLX6
hsa-miR-23a	MEF2C	hsa-miR-107	MCM7
hsa-miR-23a	MBLAC2	hsa-miR-107	RELN
hsa-miR-23a	POLR3G	hsa-miR-107	ATXN7L1
hsa-miR-23a	ARRDC3	hsa-miR-107	SYPL1
hsa-miR-23a	ST8SIA4	hsa-miR-107	HBP1
hsa-miR-23a	PJA2	hsa-miR-107	DLD
hsa-miR-23a	REEP5	hsa-miR-107	LRRN3
hsa-miR-23a	DCP2	hsa-miR-107	CAPZA2
hsa-miR-23a	TRIM36	hsa-miR-107	WNT16
hsa-miR-23a	TMED7	hsa-miR-107	GCC1
hsa-miR-23a	ATG12	hsa-miR-107	LRRC4
hsa-miR-23a	DMXL1	hsa-miR-107	CALU
hsa-miR-23a	SNX24	hsa-miR-107	AHCYL2
hsa-miR-23a	CSNK1G3	hsa-miR-107	UBE2H
hsa-miR-23a	MEGF10	hsa-miR-107	JHDM1D
hsa-miR-23a	CTXN3	hsa-miR-107	ZYX
hsa-miR-23a	SLC12A2	hsa-miR-107	LRRC61
hsa-miR-23a	FBN2	hsa-miR-107	GIMAP5
hsa-miR-23a	ISOC1	hsa-miR-107	ASB10
hsa-miR-23a	CHSY3	hsa-miR-107	EN2
hsa-miR-23a	IRF1	hsa-miR-107	CNPY1
hsa-miR-23a	AFF4	hsa-miR-107	XKR6
hsa-miR-23a	C5orf15	hsa-miR-107	MTMR9
hsa-miR-23a	CDKL3	hsa-miR-107	LONRF1
hsa-miR-23a	SEC24A	hsa-miR-107	ATP6V1B2
hsa-miR-23a	SPOCK1	hsa-miR-107	ADAM7
hsa-miR-23a	ANKHD1	hsa-miR-107	TRIM35
hsa-miR-23a	NDUFA2	hsa-miR-107	EPHX2
hsa-miR-23a	PCDHB6	hsa-miR-107	PROSC
hsa-miR-23a	GNPDA1	hsa-miR-107	GPR124
hsa-miR-23a	GRPEL2	hsa-miR-107	RAB11FIP1
hsa-miR-23a	CNOT8	hsa-miR-107	ANK1
hsa-miR-23a	ADAM19	hsa-miR-107	SLC20A2
hsa-miR-23a	CYFIP2	hsa-miR-107	PLAG1
hsa-miR-23a	UBLCP1	hsa-miR-107	SDCBP
hsa-miR-23a	IL12B	hsa-miR-107	ASPH
hsa-miR-23a	CCNG1	hsa-miR-107	ARMC1
hsa-miR-23a	CPEB4	hsa-miR-107	MYBL1
hsa-miR-23a	LMAN2	hsa-miR-107	VCPIP1
hsa-miR-23a	ZFP2	hsa-miR-107	TRAM1
hsa-miR-23a	ZNF454	hsa-miR-107	EYA1
hsa-miR-23a	PRPF4B	hsa-miR-107	RDH10
hsa-miR-23a	C6orf146	hsa-miR-107	TPD52
hsa-miR-23a	MUTED	hsa-miR-107	ZBTB10
hsa-miR-23a	GCNT2	hsa-miR-107	PAG1
hsa-miR-23a	GCM2	hsa-miR-107	SNX16
hsa-miR-23a	ELOVL2	hsa-miR-107	CA2
hsa-miR-23a	JARID2	hsa-miR-107	WWP1
hsa-miR-23a	ATXN1	hsa-miR-107	MMP16
hsa-miR-23a	DEK	hsa-miR-107	TMEM55A
hsa-miR-23a	NRSN1	hsa-miR-107	SLC26A7
hsa-miR-23a	DCDC2	hsa-miR-107	RUNX1T1
hsa-miR-23a	C6orf62	hsa-miR-107	PLEKHF2
hsa-miR-23a	ABT1	hsa-miR-107	FZD6
hsa-miR-23a	NEU1	hsa-miR-107	ZFPM2
hsa-miR-23a	COL11A2	hsa-miR-107	TRPS1
hsa-miR-23a	SNRPC	hsa-miR-107	ENPP2
hsa-miR-23a	SRPK1	hsa-miR-107	ENPP2
hsa-miR-23a	MAPK14	hsa-miR-107	HAS2
hsa-miR-23a	KCTD20	hsa-miR-107	ZHX1
hsa-miR-23a	KIF6	hsa-miR-107	FAM91A1
hsa-miR-23a	PRPH2	hsa-miR-107	TMEM71
hsa-miR-23a	ENPP5	hsa-miR-107	PHF20L1
hsa-miR-23a	ICK	hsa-miR-107	TRAPPC9
hsa-miR-23a	ELOVL5	hsa-miR-107	BAI1
hsa-miR-23a	BEND6	hsa-miR-107	PUF60
hsa-miR-23a	BAG2	hsa-miR-107	GPR172A
hsa-miR-23a	FILIP1	hsa-miR-107	DMRT2
hsa-miR-23a	SENP6	hsa-miR-107	GLIS3
hsa-miR-23a	ELOVL4	hsa-miR-107	CDC37L1
hsa-miR-23a	FAM46A	hsa-miR-107	PTPRD
hsa-miR-23a	PRSS35	hsa-miR-107	MPDZ
hsa-miR-23a	KIAA1009	hsa-miR-107	SH3GL2
hsa-miR-23a	ZNF292	hsa-miR-107	IFNK
hsa-miR-23a	GJB7	hsa-miR-107	TMEM215
hsa-miR-23a	SPACA1	hsa-miR-107	VCP
hsa-miR-23a	CNR1	hsa-miR-107	RECK
hsa-miR-23a	PNRC1	hsa-miR-107	RNF38
hsa-miR-23a	FHL5	hsa-miR-107	FBXO10
hsa-miR-23a	KLHL32	hsa-miR-107	TLE4
hsa-miR-23a	LIN28B	hsa-miR-107	TLE1
hsa-miR-23a	PREP	hsa-miR-107	NTRK2
hsa-miR-23a	SEC63	hsa-miR-107	SPIN1
hsa-miR-23a	FOXO3	hsa-miR-107	SEMA4D
hsa-miR-23a	CDC40	hsa-miR-107	GADD45G
hsa-miR-23a	MARCKS	hsa-miR-107	IARS
hsa-miR-23a	FRK	hsa-miR-107	IPPK
hsa-miR-23a	TSPYL4	hsa-miR-107	TRIM14
hsa-miR-23a	FAM26D	hsa-miR-107	NR4A3
hsa-miR-23a	RFX6	hsa-miR-107	SLC44A1
hsa-miR-23a	VGLL2	hsa-miR-107	KLF4
hsa-miR-23a	GOPC	hsa-miR-107	PTPN3
hsa-miR-23a	NUS1	hsa-miR-107	PALM2-AKAP2
hsa-miR-23a	ASF1A	hsa-miR-107	SVEP1
hsa-miR-23a	GJA1	hsa-miR-107	ALAD
hsa-miR-23a	SERINC1	hsa-miR-107	PAPPA
hsa-miR-23a	TRDN	hsa-miR-107	PHF19
hsa-miR-23a	NKAIN2	hsa-miR-107	RABGAP1
hsa-miR-23a	HDDC2	hsa-miR-107	PPP6C
hsa-miR-23a	ECHDC1	hsa-miR-107	ZBTB34
hsa-miR-23a	PTPRK	hsa-miR-107	RALGPS1
hsa-miR-23a	SAMD3	hsa-miR-107	TBC1D13
hsa-miR-23a	ARG1	hsa-miR-107	OLFM1
hsa-miR-23a	SGK1	hsa-miR-107	MRPS2
hsa-miR-23a	BCLAF1	hsa-miR-107	UBAC1
hsa-miR-23a	MAP7	hsa-miR-107	LCN15
hsa-miR-23a	MAP3K5	hsa-miR-107	NELF
hsa-miR-23a	TNFAIP3	hsa-miR-107	PNPLA7
hsa-miR-23a	CCDC28A	hsa-miR-107	STS
hsa-miR-23a	TXLNB	hsa-miR-107	TBL1X
hsa-miR-23a	LTV1	hsa-miR-107	PRPS2
hsa-miR-23a	PLAGL1	hsa-miR-107	GLRA2
hsa-miR-23a	IYD	hsa-miR-107	FIGF
hsa-miR-23a	AKAP12	hsa-miR-107	BMX
hsa-miR-23a	ZBTB2	hsa-miR-107	AP1S2
hsa-miR-23a	SYNE1	hsa-miR-107	RS1
hsa-miR-23a	MYCT1	hsa-miR-107	CXorf23
hsa-miR-23a	VIP	hsa-miR-107	RPS6KA3
hsa-miR-23a	IPCEF1	hsa-miR-107	IL1RAPL1
hsa-miR-23a	RSPH3	hsa-miR-107	DMD
hsa-miR-23a	WTAP	hsa-miR-107	TMEM47
hsa-miR-23a	MAS1	hsa-miR-107	PRRG1
hsa-miR-23a	AGPAT4	hsa-miR-107	DYNLT3
hsa-miR-23a	PDGFA	hsa-miR-107	SRPX
hsa-miR-23a	RBAK	hsa-miR-107	CASK
hsa-miR-23a	ETV1	hsa-miR-107	NDP
hsa-miR-23a	ITGB8	hsa-miR-107	ZNF673
hsa-miR-23a	KLHL7	hsa-miR-107	ARAF
hsa-miR-23a	OSBPL3	hsa-miR-107	CLCN5
hsa-miR-23a	CYCS	hsa-miR-107	RIBC1
hsa-miR-23a	HOXA3	hsa-miR-107	HUWE1
hsa-miR-23a	JAZF1	hsa-miR-107	WNK3
hsa-miR-23a	ZNRF2	hsa-miR-107	MTMR8
hsa-miR-23a	C7orf16	hsa-miR-107	ZC3H12B
hsa-miR-23a	BBS9	hsa-miR-107	EDA
hsa-miR-23a	HECW1	hsa-miR-107	DLG3
hsa-miR-23a	SPDYE1	hsa-miR-107	OGT
hsa-miR-23a	CCM2	hsa-miR-107	PHKA1
hsa-miR-23a	ADCY1	hsa-miR-107	PABPC1L2B
hsa-miR-23a	ZNF680	hsa-miR-107	CHIC1
hsa-miR-23a	ZNF107	hsa-miR-107	KIAA2022
hsa-miR-23a	ZNF138	hsa-miR-107	ZNF711
hsa-miR-23a	ZNF117	hsa-miR-107	POF1B
hsa-miR-23a	ZNF92	hsa-miR-107	DIAPH2
hsa-miR-23a	VKORC1L1	hsa-miR-107	RAB40AL
hsa-miR-23a	TPST1	hsa-miR-107	RAB40A
hsa-miR-23a	AUTS2	hsa-miR-107	PLP1
hsa-miR-23a	POM121	hsa-miR-107	AMMECR1
hsa-miR-23a	TBL2	hsa-miR-107	DCX
hsa-miR-23a	VPS37D	hsa-miR-107	AMOT
hsa-miR-23a	POM121C	hsa-miR-107	PLS3
hsa-miR-23a	YWHAG	hsa-miR-107	LONRF3
hsa-miR-23a	AC007000.1	hsa-miR-107	SEPT6
hsa-miR-23a	RSBN1L	hsa-miR-107	GLUD2
hsa-miR-23a	GNAI1	hsa-miR-107	APLN
hsa-miR-23a	CLDN12	hsa-miR-107	RAP2C
hsa-miR-23a	MTERF	hsa-miR-107	HPRT1
hsa-miR-23a	CYP51A1	hsa-miR-107	ZNF449
hsa-miR-23a	ANKIB1	hsa-miR-107	SLITRK2
hsa-miR-23a	SAMD9	hsa-miR-107	MAMLD1
hsa-miR-23a	CALCR	hsa-miR-107	MTM1
hsa-miR-23a	TFPI2	hsa-miR-107	TMSB4Y
hsa-miR-23a	BET1	hsa-miR-20a	MMP23B
hsa-miR-23a	PON2	hsa-miR-20a	SKI
hsa-miR-23a	PDK4	hsa-miR-20a	TPRG1L
hsa-miR-23a	TAC1	hsa-miR-20a	CHD5
hsa-miR-23a	TECPR1	hsa-miR-20a	CAMTA1
hsa-miR-23a	TRRAP	hsa-miR-20a	CLSTN1
hsa-miR-23a	CPSF4	hsa-miR-20a	KIF1B
hsa-miR-23a	ZNF655	hsa-miR-20a	MFN2
hsa-miR-23a	MEPCE	hsa-miR-20a	DNAJC16
hsa-miR-23a	TFR2	hsa-miR-20a	AKR7A2
hsa-miR-23a	RABL5	hsa-miR-20a	PQLC2
hsa-miR-23a	SRPK2	hsa-miR-20a	NBL1
hsa-miR-23a	NAMPT	hsa-miR-20a	CAMK2N1
hsa-miR-23a	GPR22	hsa-miR-20a	DDOST
hsa-miR-23a	C7orf60	hsa-miR-20a	HP1BP3
hsa-miR-23a	FOXP2	hsa-miR-20a	EIF4G3
hsa-miR-23a	MDFIC	hsa-miR-20a	ECE1
hsa-miR-23a	TFEC	hsa-miR-20a	C1orf63
hsa-miR-23a	TES	hsa-miR-20a	LDLRAP1
hsa-miR-23a	CAV2	hsa-miR-20a	MAN1C1
hsa-miR-23a	MET	hsa-miR-20a	C1orf135
hsa-miR-23a	CAPZA2	hsa-miR-20a	PAFAH2
hsa-miR-23a	NAA38	hsa-miR-20a	WASF2
hsa-miR-23a	TSPAN12	hsa-miR-20a	RPA2
hsa-miR-23a	NDUFA5	hsa-miR-20a	PHACTR4
hsa-miR-23a	ASB15	hsa-miR-20a	EPB41
hsa-miR-23a	GPR37	hsa-miR-20a	PTP4A2
hsa-miR-23a	GCC1	hsa-miR-20a	TXLNA
hsa-miR-23a	LRRC4	hsa-miR-20a	ZBTB8A
hsa-miR-23a	CALU	hsa-miR-20a	KIAA1522
hsa-miR-23a	FLNC	hsa-miR-20a	FNDC5
hsa-miR-23a	FAM40B	hsa-miR-20a	ZNF362
hsa-miR-23a	MKLN1	hsa-miR-20a	ZSCAN20
hsa-miR-23a	SLC35B4	hsa-miR-20a	EIF2C1
hsa-miR-23a	TMEM213	hsa-miR-20a	MTF1
hsa-miR-23a	JHDM1D	hsa-miR-20a	AKIRIN1
hsa-miR-23a	MRPS33	hsa-miR-20a	BMP8B
hsa-miR-23a	ARHGEF5	hsa-miR-20a	MYCL1
hsa-miR-23a	GIMAP7	hsa-miR-20a	DEM1
hsa-miR-23a	ACTR3B	hsa-miR-20a	FOXJ3
hsa-miR-23a	LMBR1	hsa-miR-20a	RIMKLA
hsa-miR-23a	FBXO25	hsa-miR-20a	KIAA0494
hsa-miR-23a	ERICH1	hsa-miR-20a	TAL1
hsa-miR-23a	DLGAP2	hsa-miR-20a	CMPK1
hsa-miR-23a	AGPAT5	hsa-miR-20a	DMRTA2
hsa-miR-23a	MFHAS1	hsa-miR-20a	RNF11
hsa-miR-23a	MTMR9	hsa-miR-20a	ZFYVE9
hsa-miR-23a	EFHA2	hsa-miR-20a	USP24
hsa-miR-23a	ATP6V1B2	hsa-miR-20a	HOOK1
hsa-miR-23a	SLC39A14	hsa-miR-20a	INADL
hsa-miR-23a	C8orf58	hsa-miR-20a	JAK1
hsa-miR-23a	EGR3	hsa-miR-20a	SGIP1
hsa-miR-23a	NEFL	hsa-miR-20a	TCTEX1D1
hsa-miR-23a	BNIP3L	hsa-miR-20a	ANKRD13C
hsa-miR-23a	PTK2B	hsa-miR-20a	PTGER3
hsa-miR-23a	ESCO2	hsa-miR-20a	AC093158.1
hsa-miR-23a	ZNF395	hsa-miR-20a	C1orf173
hsa-miR-23a	EXTL3	hsa-miR-20a	LHX8
hsa-miR-23a	GTF2E2	hsa-miR-20a	ST6GALNAC3
hsa-miR-23a	ERLIN2	hsa-miR-20a	ZZZ3
hsa-miR-23a	PROSC	hsa-miR-20a	USP33
hsa-miR-23a	SFRP1	hsa-miR-20a	PRKACB
hsa-miR-23a	FNTA	hsa-miR-20a	SSX2IP
hsa-miR-23a	UBE2V2	hsa-miR-20a	BCL10
hsa-miR-23a	ST18	hsa-miR-20a	DDAH1
hsa-miR-23a	LYPLA1	hsa-miR-20a	HS2ST1
hsa-miR-23a	TOX	hsa-miR-20a	PKN2
hsa-miR-23a	CHD7	hsa-miR-20a	GBP3
hsa-miR-23a	PDE7A	hsa-miR-20a	LRRC8B
hsa-miR-23a	VCPIP1	hsa-miR-20a	TMED5
hsa-miR-23a	RDH10	hsa-miR-20a	FNBP1L
hsa-miR-23a	CRISPLD1	hsa-miR-20a	ABCD3
hsa-miR-23a	HNF4G	hsa-miR-20a	F3
hsa-miR-23a	ZFHX4	hsa-miR-20a	DPYD
hsa-miR-23a	PKIA	hsa-miR-20a	HIAT1
hsa-miR-23a	PMP2	hsa-miR-20a	SLC30A7
hsa-miR-23a	CA2	hsa-miR-20a	S1PR1
hsa-miR-23a	CALB1	hsa-miR-20a	OLFM3
hsa-miR-23a	TMEM64	hsa-miR-20a	SLC25A24
hsa-miR-23a	SLC26A7	hsa-miR-20a	CELSR2
hsa-miR-23a	ESRP1	hsa-miR-20a	HBXIP
hsa-miR-23a	DPY19L4	hsa-miR-20a	DRAM2
hsa-miR-23a	PLEKHF2	hsa-miR-20a	RAP1A
hsa-miR-23a	HRSP12	hsa-miR-20a	RHOC
hsa-miR-23a	NIPAL2	hsa-miR-20a	MAGI3
hsa-miR-23a	RRM2B	hsa-miR-20a	RSBN1
hsa-miR-23a	KLF10	hsa-miR-20a	BCL2L15
hsa-miR-23a	ATP6V1C1	hsa-miR-20a	TRIM33
hsa-miR-23a	OXR1	hsa-miR-20a	CSDE1
hsa-miR-23a	CSMD3	hsa-miR-20a	SIKE1
hsa-miR-23a	TRPS1	hsa-miR-20a	VANGL1
hsa-miR-23a	UTP23	hsa-miR-20a	PTGFRN
hsa-miR-23a	SAMD12	hsa-miR-20a	FAM46C
hsa-miR-23a	HAS2	hsa-miR-20a	ZNF697
hsa-miR-23a	ZHX1	hsa-miR-20a	NOTCH2NL
hsa-miR-23a	FBXO32	hsa-miR-20a	TXNIP
hsa-miR-23a	MTSS1	hsa-miR-20a	ITGA10
hsa-miR-23a	ZNF572	hsa-miR-20a	PRKAB2
hsa-miR-23a	TRIB1	hsa-miR-20a	MCL1
hsa-miR-23a	ASAP1	hsa-miR-20a	CTSS
hsa-miR-23a	TMEM71	hsa-miR-20a	CTSK
hsa-miR-23a	FAM135B	hsa-miR-20a	C1orf56
hsa-miR-23a	RFX3	hsa-miR-20a	CRCT1
hsa-miR-23a	SLC1A1	hsa-miR-20a	GATAD2B
hsa-miR-23a	CDC37L1	hsa-miR-20a	TPM3
hsa-miR-23a	NFIB	hsa-miR-20a	SLC50A1
hsa-miR-23a	TTC39B	hsa-miR-20a	ASH1L
hsa-miR-23a	BNC2	hsa-miR-20a	MSTO1
hsa-miR-23a	HAUS6	hsa-miR-20a	RIT1
hsa-miR-23a	ACO1	hsa-miR-20a	MRPL24
hsa-miR-23a	NFX1	hsa-miR-20a	PIGM
hsa-miR-23a	UBE2R2	hsa-miR-20a	KCNJ10
hsa-miR-23a	UBAP2	hsa-miR-20a	ATP1A2
hsa-miR-23a	GLIPR2	hsa-miR-20a	DCAF8
hsa-miR-23a	RNF38	hsa-miR-20a	COPA
hsa-miR-23a	SHB	hsa-miR-20a	NHLH1
hsa-miR-23a	TJP2	hsa-miR-20a	DEDD
hsa-miR-23a	TMEM2	hsa-miR-20a	HSPA6
hsa-miR-23a	C9orf85	hsa-miR-20a	RGS4
hsa-miR-23a	GDA	hsa-miR-20a	ALDH9A1
hsa-miR-23a	ALDH1A1	hsa-miR-20a	PRRX1
hsa-miR-23a	GCNT1	hsa-miR-20a	FMO3
hsa-miR-23a	GOLM1	hsa-miR-20a	C1orf9
hsa-miR-23a	C9orf170	hsa-miR-20a	KLHL20
hsa-miR-23a	SECISBP2	hsa-miR-20a	RC3H1
hsa-miR-23a	AUH	hsa-miR-20a	ABL2
hsa-miR-23a	IPPK	hsa-miR-20a	XPR1
hsa-miR-23a	BICD2	hsa-miR-20a	STX6
hsa-miR-23a	FBP2	hsa-miR-20a	RNASEL
hsa-miR-23a	C9orf21	hsa-miR-20a	NPL
hsa-miR-23a	ZNF782	hsa-miR-20a	LAMC1
hsa-miR-23a	TMOD1	hsa-miR-20a	NCF2
hsa-miR-23a	GALNT12	hsa-miR-20a	RGL1
hsa-miR-23a	COL15A1	hsa-miR-20a	APOBEC4
hsa-miR-23a	NR4A3	hsa-miR-20a	FAM129A
hsa-miR-23a	STX17	hsa-miR-20a	RNF2
hsa-miR-23a	RAD23B	hsa-miR-20a	IVNS1ABP
hsa-miR-23a	C9orf5	hsa-miR-20a	B3GALT2
hsa-miR-23a	LPAR1	hsa-miR-20a	ZBTB41
hsa-miR-23a	ROD1	hsa-miR-20a	CAMSAP1L1
hsa-miR-23a	WDR31	hsa-miR-20a	IPO9
hsa-miR-23a	PHF19	hsa-miR-20a	TIMM17A
hsa-miR-23a	ZBTB26	hsa-miR-20a	BTG2
hsa-miR-23a	NEK6	hsa-miR-20a	PPP1R15B
hsa-miR-23a	NR6A1	hsa-miR-20a	MDM4
hsa-miR-23a	ZBTB34	hsa-miR-20a	DSTYK
hsa-miR-23a	GLT6D1	hsa-miR-20a	SLC41A1
hsa-miR-23a	NACC2	hsa-miR-20a	SRGAP2
hsa-miR-23a	NLGN4X	hsa-miR-20a	YOD1
hsa-miR-23a	KAL1	hsa-miR-20a	CR1
hsa-miR-23a	SHROOM2	hsa-miR-20a	DIEXF
hsa-miR-23a	TRAPPC2	hsa-miR-20a	SYT14
hsa-miR-23a	GPM6B	hsa-miR-20a	LPGAT1
hsa-miR-23a	AP1S2	hsa-miR-20a	INTS7
hsa-miR-23a	REPS2	hsa-miR-20a	VASH2
hsa-miR-23a	NHS	hsa-miR-20a	ANGEL2
hsa-miR-23a	GPR64	hsa-miR-20a	KCNK2
hsa-miR-23a	CXorf23	hsa-miR-20a	GPATCH2
hsa-miR-23a	SMPX	hsa-miR-20a	DUSP10
hsa-miR-23a	SMS	hsa-miR-20a	PARP1
hsa-miR-23a	MAGEB18	hsa-miR-20a	WDR26
hsa-miR-23a	MAGEB2	hsa-miR-20a	ITPKB
hsa-miR-23a	TAB3	hsa-miR-20a	PGBD5
hsa-miR-23a	CXorf22	hsa-miR-20a	EGLN1
hsa-miR-23a	PRRG1	hsa-miR-20a	KIAA1383
hsa-miR-23a	SRPX	hsa-miR-20a	KCNK1
hsa-miR-23a	MED14	hsa-miR-20a	SLC35F3
hsa-miR-23a	CASK	hsa-miR-20a	IRF2BP2
hsa-miR-23a	EFHC2	hsa-miR-20a	ARID4B
hsa-miR-23a	KDM6A	hsa-miR-20a	LYST
hsa-miR-23a	CHST7	hsa-miR-20a	GPR137B
hsa-miR-23a	RP2	hsa-miR-20a	KMO
hsa-miR-23a	PAGE4	hsa-miR-20a	WDR64
hsa-miR-23a	TSR2	hsa-miR-20a	PLD5
hsa-miR-23a	FAM123B	hsa-miR-20a	CEP170
hsa-miR-23a	MTMR8	hsa-miR-20a	AKT3
hsa-miR-23a	ZC4H2	hsa-miR-20a	ZNF238
hsa-miR-23a	PJA1	hsa-miR-20a	KIF26B
hsa-miR-23a	ARR3	hsa-miR-20a	AHCTF1
hsa-miR-23a	FOXO4	hsa-miR-20a	NLRP3
hsa-miR-23a	MED12	hsa-miR-20a	WDR37
hsa-miR-23a	NONO	hsa-miR-20a	PFKP
hsa-miR-23a	ACRC	hsa-miR-20a	FBXO18
hsa-miR-23a	SLC16A2	hsa-miR-20a	PFKFB3
hsa-miR-23a	MAGEE1	hsa-miR-20a	CELF2
hsa-miR-23a	TAF9B	hsa-miR-20a	OPTN
hsa-miR-23a	PABPC5	hsa-miR-20a	FRMD4A
hsa-miR-23a	PCDH19	hsa-miR-20a	DCLRE1C
hsa-miR-23a	BEX5	hsa-miR-20a	NMT2
hsa-miR-23a	NRK	hsa-miR-20a	FAM188A
hsa-miR-23a	CXorf57	hsa-miR-20a	CUBN
hsa-miR-23a	COL4A5	hsa-miR-20a	C10orf140
hsa-miR-23a	AMMECR1	hsa-miR-20a	PIP4K2A
hsa-miR-23a	PAK3	hsa-miR-20a	GPR158
hsa-miR-23a	CAPN6	hsa-miR-20a	MYO3A
hsa-miR-23a	ALG13	hsa-miR-20a	ABI1
hsa-miR-23a	HTR2C	hsa-miR-20a	YME1L1
hsa-miR-23a	SLC6A14	hsa-miR-20a	MASTL
hsa-miR-23a	KLHL13	hsa-miR-20a	ACBD5
hsa-miR-23a	LONRF3	hsa-miR-20a	WAC
hsa-miR-23a	XIAP	hsa-miR-20a	BAMBI
hsa-miR-23a	ODZ1	hsa-miR-20a	MAP3K8
hsa-miR-23a	ELF4	hsa-miR-20a	ARHGAP12
hsa-miR-23a	ZNF280C	hsa-miR-20a	ITGB1
hsa-miR-23a	IGSF1	hsa-miR-20a	CREM
hsa-miR-23a	HS6ST2	hsa-miR-20a	ZNF25
hsa-miR-23a	GPC4	hsa-miR-20a	RASGEF1A
hsa-miR-23a	MMGT1	hsa-miR-20a	ZNF239
hsa-miR-23a	ATP11C	hsa-miR-20a	MARCH8
hsa-miR-23a	FMR1	hsa-miR-20a	ANUBL1
hsa-miR-23a	MAGEA8	hsa-miR-20a	SGMS1
hsa-miR-23a	MTM1	hsa-miR-20a	UBE2D1
hsa-miR-23a	MAGEA1	hsa-miR-20a	FAM13C
hsa-miR-23a	FUNDC2	hsa-miR-20a	SLC16A9
hsa-miR-23a	BRCC3	hsa-miR-20a	CCDC6
hsa-miR-23a	VBP1	hsa-miR-20a	EGR2
hsa-miR-23a	RAB39B	hsa-miR-20a	REEP3
hsa-miR-23a	USP9Y	hsa-miR-20a	MYPN
hsa-miR-23a	NLGN4Y	hsa-miR-20a	PBLD
hsa-miR-150	ATAD3B	hsa-miR-20a	RUFY2
hsa-miR-150	ATAD3A	hsa-miR-20a	TET1
hsa-miR-150	ACTRT2	hsa-miR-20a	VPS26A
hsa-miR-150	ICMT	hsa-miR-20a	LRRC20
hsa-miR-150	FBXO6	hsa-miR-20a	USP54
hsa-miR-150	KAZN	hsa-miR-20a	SAMD8
hsa-miR-150	C1orf144	hsa-miR-20a	KCNMA1
hsa-miR-150	ARHGEF10L	hsa-miR-20a	C10orf58
hsa-miR-150	CAPZB	hsa-miR-20a	FAM190B
hsa-miR-150	NBPF3	hsa-miR-20a	PTEN
hsa-miR-150	EPHB2	hsa-miR-20a	IFIT5
hsa-miR-150	CD52	hsa-miR-20a	SLC16A12
hsa-miR-150	PPP1R8	hsa-miR-20a	HECTD2
hsa-miR-150	EPB41	hsa-miR-20a	TNKS2
hsa-miR-150	ZMYM4	hsa-miR-20a	CPEB3
hsa-miR-150	EIF2C1	hsa-miR-20a	KIF11
hsa-miR-150	AKIRIN1	hsa-miR-20a	CCNJ
hsa-miR-150	TRIT1	hsa-miR-20a	FAM178A
hsa-miR-150	RIMS3	hsa-miR-20a	MRPL43
hsa-miR-150	ERMAP	hsa-miR-20a	SEMA4G
hsa-miR-150	SLC2A1	hsa-miR-20a	MGEA5
hsa-miR-150	ELOVL1	hsa-miR-20a	GBF1
hsa-miR-150	TESK2	hsa-miR-20a	PSD
hsa-miR-150	CYP4A11	hsa-miR-20a	TRIM8
hsa-miR-150	CYP4X1	hsa-miR-20a	SH3PXD2A
hsa-miR-150	OSBPL9	hsa-miR-20a	SLK
hsa-miR-150	ZFYVE9	hsa-miR-20a	SFR1
hsa-miR-150	C1orf177	hsa-miR-20a	MXI1
hsa-miR-150	KANK4	hsa-miR-20a	SHOC2
hsa-miR-150	FOXD3	hsa-miR-20a	GPAM
hsa-miR-150	PGM1	hsa-miR-20a	CASP7
hsa-miR-150	CTH	hsa-miR-20a	ABLIM1
hsa-miR-150	NEGR1	hsa-miR-20a	FAM160B1
hsa-miR-150	FAM73A	hsa-miR-20a	KIAA1598
hsa-miR-150	ZNF326	hsa-miR-20a	C10orf46
hsa-miR-150	SNX7	hsa-miR-20a	NANOS1
hsa-miR-150	FAM46C	hsa-miR-20a	FAM45A
hsa-miR-150	PDE4DIP	hsa-miR-20a	INPP5F
hsa-miR-150	OTUD7B	hsa-miR-20a	PLEKHA1
hsa-miR-150	ENSA	hsa-miR-20a	ACADSB
hsa-miR-150	GOLPH3L	hsa-miR-20a	ZRANB1
hsa-miR-150	TUFT1	hsa-miR-20a	PTPRE
hsa-miR-150	CELF3	hsa-miR-20a	PRAP1
hsa-miR-150	FLG2	hsa-miR-20a	RNH1
hsa-miR-150	TPM3	hsa-miR-20a	DUSP8
hsa-miR-150	CHRNB2	hsa-miR-20a	OSBPL5
hsa-miR-150	KCNN3	hsa-miR-20a	TRIM3
hsa-miR-150	ADAM15	hsa-miR-20a	STK33
hsa-miR-150	GON4L	hsa-miR-20a	TMEM9B
hsa-miR-150	SLC25A44	hsa-miR-20a	WEE1
hsa-miR-150	FCRL2	hsa-miR-20a	AMPD3
hsa-miR-150	IFI16	hsa-miR-20a	EIF4G2
hsa-miR-150	CADM3	hsa-miR-20a	BTBD10
hsa-miR-150	CRP	hsa-miR-20a	PTH
hsa-miR-150	CD84	hsa-miR-20a	PDE3B
hsa-miR-150	POGK	hsa-miR-20a	PDE3B
hsa-miR-150	TADA1	hsa-miR-20a	HPS5
hsa-miR-150	MPZL1	hsa-miR-20a	TSG101
hsa-miR-150	DCAF6	hsa-miR-20a	UEVLD
hsa-miR-150	GPR161	hsa-miR-20a	SPTY2D1
hsa-miR-150	BLZF1	hsa-miR-20a	NAV2
hsa-miR-150	FMO2	hsa-miR-20a	FIBIN
hsa-miR-150	PRRC2C	hsa-miR-20a	PRRG4
hsa-miR-150	RC3H1	hsa-miR-20a	LMO2
hsa-miR-150	TRMT1L	hsa-miR-20a	CAPRIN1
hsa-miR-150	CDC73	hsa-miR-20a	SLC1A2
hsa-miR-150	B3GALT2	hsa-miR-20a	FJX1
hsa-miR-150	SHISA4	hsa-miR-20a	LDLRAD3
hsa-miR-150	PPP1R12B	hsa-miR-20a	ALX4
hsa-miR-150	KDM5B	hsa-miR-20a	CRY2
hsa-miR-150	LRRN2	hsa-miR-20a	ARHGAP1
hsa-miR-150	NFASC	hsa-miR-20a	MTCH2
hsa-miR-150	NEK2	hsa-miR-20a	FNBP4
hsa-miR-150	NENF	hsa-miR-20a	PTPRJ
hsa-miR-150	KCTD3	hsa-miR-20a	TNKS1BP1
hsa-miR-150	ACBD3	hsa-miR-20a	YPEL4
hsa-miR-150	NUP133	hsa-miR-20a	ZFP91
hsa-miR-150	TAF5L	hsa-miR-20a	TMEM138
hsa-miR-150	NID1	hsa-miR-20a	SDHAF2
hsa-miR-150	AKT3	hsa-miR-20a	AHNAK
hsa-miR-150	AHCTF1	hsa-miR-20a	BSCL2
hsa-miR-150	GATA3	hsa-miR-20a	TMEM223
hsa-miR-150	C10orf47	hsa-miR-20a	NXF1
hsa-miR-150	MCM10	hsa-miR-20a	ATL3
hsa-miR-150	RSU1	hsa-miR-20a	ATG2A
hsa-miR-150	PTF1A	hsa-miR-20a	SART1
hsa-miR-150	KIAA1217	hsa-miR-20a	CCS
hsa-miR-150	ZEB1	hsa-miR-20a	KDM2A
hsa-miR-150	GJD4	hsa-miR-20a	SUV420H1
hsa-miR-150	ZNF25	hsa-miR-20a	PPP6R3
hsa-miR-150	ZNF33A	hsa-miR-20a	CCND1
hsa-miR-150	ZNF37A	hsa-miR-20a	FGF4
hsa-miR-150	SGMS1	hsa-miR-20a	UCP3
hsa-miR-150	EGR2	hsa-miR-20a	P4HA3
hsa-miR-150	SIRT1	hsa-miR-20a	PGM2L1
hsa-miR-150	MYPN	hsa-miR-20a	XRRA1
hsa-miR-150	STOX1	hsa-miR-20a	C11orf30
hsa-miR-150	AIFM2	hsa-miR-20a	TSKU
hsa-miR-150	SAR1A	hsa-miR-20a	NDUFC2
hsa-miR-150	DNAJC9	hsa-miR-20a	C11orf82
hsa-miR-150	USP54	hsa-miR-20a	RAB30
hsa-miR-150	SYNPO2L	hsa-miR-20a	MED17
hsa-miR-150	CAMK2G	hsa-miR-20a	PANX1
hsa-miR-150	GLUD1	hsa-miR-20a	CEP57
hsa-miR-150	IFIT5	hsa-miR-20a	JRKL
hsa-miR-150	SLC16A12	hsa-miR-20a	TMEM133
hsa-miR-150	CCNJ	hsa-miR-20a	TMEM123
hsa-miR-150	TM9SF3	hsa-miR-20a	MMP3
hsa-miR-150	PIK3AP1	hsa-miR-20a	PDGFD
hsa-miR-150	ELOVL3	hsa-miR-20a	ELMOD1
hsa-miR-150	CALHM1	hsa-miR-20a	NPAT
hsa-miR-150	GSTO2	hsa-miR-20a	ZC3H12C
hsa-miR-150	SORCS3	hsa-miR-20a	ARHGAP20
hsa-miR-150	SMC3	hsa-miR-20a	PPP2R1B
hsa-miR-150	PDCD4	hsa-miR-20a	USP28
hsa-miR-150	WDR11	hsa-miR-20a	SIK3
hsa-miR-150	HTRA1	hsa-miR-20a	PAFAH1B2
hsa-miR-150	EBF3	hsa-miR-20a	MPZL2
hsa-miR-150	GLRX3	hsa-miR-20a	TMEM25
hsa-miR-150	INPP5A	hsa-miR-20a	ARCN1
hsa-miR-150	STIM1	hsa-miR-20a	ABCG4
hsa-miR-150	RBMXL2	hsa-miR-20a	SORL1
hsa-miR-150	USH1C	hsa-miR-20a	UBASH3B
hsa-miR-150	LDHAL6A	hsa-miR-20a	CRTAM
hsa-miR-150	NAV2	hsa-miR-20a	C11orf63
hsa-miR-150	ATG13	hsa-miR-20a	HSPA8
hsa-miR-150	MTCH2	hsa-miR-20a	ZNF202
hsa-miR-150	CPSF7	hsa-miR-20a	PRDM10
hsa-miR-150	FADS1	hsa-miR-20a	WNK1
hsa-miR-150	INCENP	hsa-miR-20a	RAD52
hsa-miR-150	UBXN1	hsa-miR-20a	TSPAN9
hsa-miR-150	TMEM179B	hsa-miR-20a	CCND2
hsa-miR-150	STX5	hsa-miR-20a	KCNA1
hsa-miR-150	ARL2	hsa-miR-20a	PLEKHG6
hsa-miR-150	DPF2	hsa-miR-20a	NCAPD2
hsa-miR-150	MAP3K11	hsa-miR-20a	FOXJ2
hsa-miR-150	B3GNT1	hsa-miR-20a	CLEC4D
hsa-miR-150	SUV420H1	hsa-miR-20a	MFAP5
hsa-miR-150	LRP5	hsa-miR-20a	M6PR
hsa-miR-150	PDE2A	hsa-miR-20a	CD69
hsa-miR-150	POLD3	hsa-miR-20a	PTPRO
hsa-miR-150	MMP13	hsa-miR-20a	LMO3
hsa-miR-150	DDI1	hsa-miR-20a	IAPP
hsa-miR-150	KDELC2	hsa-miR-20a	KCNJ8
hsa-miR-150	ARHGAP20	hsa-miR-20a	RASSF8
hsa-miR-150	POU2AF1	hsa-miR-20a	BHLHE41
hsa-miR-150	ZW10	hsa-miR-20a	PTHLH
hsa-miR-150	SIDT2	hsa-miR-20a	IPO8
hsa-miR-150	MLL	hsa-miR-20a	CAPRIN2
hsa-miR-150	IFT46	hsa-miR-20a	FAM60A
hsa-miR-150	VPS11	hsa-miR-20a	DENND5B
hsa-miR-150	C2CD2L	hsa-miR-20a	FGD4
hsa-miR-150	CBL	hsa-miR-20a	ABCD2
hsa-miR-150	ESAM	hsa-miR-20a	IRAK4
hsa-miR-150	SLC6A12	hsa-miR-20a	TWF1
hsa-miR-150	ADIPOR2	hsa-miR-20a	DBX2
hsa-miR-150	CACNA1C	hsa-miR-20a	ANO6
hsa-miR-150	PARP11	hsa-miR-20a	AMIGO2
hsa-miR-150	PTMS	hsa-miR-20a	SLC48A1
hsa-miR-150	LEPREL2	hsa-miR-20a	SENP1
hsa-miR-150	GNB3	hsa-miR-20a	LALBA
hsa-miR-150	AICDA	hsa-miR-20a	DNAJC22
hsa-miR-150	CLEC2D	hsa-miR-20a	SPATS2
hsa-miR-150	PRH2	hsa-miR-20a	FMNL3
hsa-miR-150	DUSP16	hsa-miR-20a	TMBIM6
hsa-miR-150	CDKN1B	hsa-miR-20a	RACGAP1
hsa-miR-150	GRIN2B	hsa-miR-20a	LIMA1
hsa-miR-150	RASSF8	hsa-miR-20a	DIP2B
hsa-miR-150	IPO8	hsa-miR-20a	POU6F1
hsa-miR-150	DENND5B	hsa-miR-20a	DAZAP2
hsa-miR-150	AMN1	hsa-miR-20a	GALNT6
hsa-miR-150	SLC38A4	hsa-miR-20a	SCN8A
hsa-miR-150	C12orf68	hsa-miR-20a	MAP3K12
hsa-miR-150	CACNB3	hsa-miR-20a	ZNF385A
hsa-miR-150	RACGAP1	hsa-miR-20a	PDE1B
hsa-miR-150	SMARCD1	hsa-miR-20a	PPP1R1A
hsa-miR-150	CERS5	hsa-miR-20a	RAB5B
hsa-miR-150	ACVR1B	hsa-miR-20a	IKZF4
hsa-miR-150	KRT79	hsa-miR-20a	ERBB3
hsa-miR-150	EIF4B	hsa-miR-20a	ANKRD52
hsa-miR-150	TENC1	hsa-miR-20a	HSD17B6
hsa-miR-150	MFSD5	hsa-miR-20a	KIF5A
hsa-miR-150	SP1	hsa-miR-20a	PIP4K2C
hsa-miR-150	MAP3K12	hsa-miR-20a	SLC16A7
hsa-miR-150	HOXC9	hsa-miR-20a	AVPR1A
hsa-miR-150	PA2G4	hsa-miR-20a	C12orf66
hsa-miR-150	ANKRD52	hsa-miR-20a	GNS
hsa-miR-150	TMEM194A	hsa-miR-20a	HMGA2
hsa-miR-150	MBD6	hsa-miR-20a	DYRK2
hsa-miR-150	AGAP2	hsa-miR-20a	CPSF6
hsa-miR-150	MARCH3	hsa-miR-20a	FRS2
hsa-miR-150	PPM1H	hsa-miR-20a	RAB3IP
hsa-miR-150	RAB3IP	hsa-miR-20a	THAP2
hsa-miR-150	PLXNC1	hsa-miR-20a	RAB21
hsa-miR-150	IKBIP	hsa-miR-20a	TBC1D15
hsa-miR-150	FAM71C	hsa-miR-20a	MYF5
hsa-miR-150	ASCL1	hsa-miR-20a	ACSS3
hsa-miR-150	HSP90B1	hsa-miR-20a	KITLG
hsa-miR-150	TDG	hsa-miR-20a	DUSP6
hsa-miR-150	APPL2	hsa-miR-20a	ATP2B1
hsa-miR-150	ARPC3	hsa-miR-20a	C12orf74
hsa-miR-150	ACAD10	hsa-miR-20a	EEA1
hsa-miR-150	TMEM116	hsa-miR-20a	NTN4
hsa-miR-150	GLT1D1	hsa-miR-20a	ELK3
hsa-miR-150	NBEA	hsa-miR-20a	CDK17
hsa-miR-150	FREM2	hsa-miR-20a	TMPO
hsa-miR-150	BORA	hsa-miR-20a	IKBIP
hsa-miR-150	TGDS	hsa-miR-20a	ARL1
hsa-miR-150	IPO5	hsa-miR-20a	GNPTAB
hsa-miR-150	RASA3	hsa-miR-20a	USP30
hsa-miR-150	MYH7	hsa-miR-20a	MVK
hsa-miR-150	NRL	hsa-miR-20a	TBX3
hsa-miR-150	NUBPL	hsa-miR-20a	TESC
hsa-miR-150	MGAT2	hsa-miR-20a	FBXO21
hsa-miR-150	NEMF	hsa-miR-20a	TAOK3
hsa-miR-150	TRIM9	hsa-miR-20a	CIT
hsa-miR-150	FRMD6	hsa-miR-20a	P2RX7
hsa-miR-150	GPR137C	hsa-miR-20a	P2RX4
hsa-miR-150	ERO1L	hsa-miR-20a	RNF34
hsa-miR-150	SYNJ2BP	hsa-miR-20a	ORAI1
hsa-miR-150	FAM161B	hsa-miR-20a	MLXIP
hsa-miR-150	ALDH6A1	hsa-miR-20a	RSRC2
hsa-miR-150	LTBP2	hsa-miR-20a	ABCB9
hsa-miR-150	ZDHHC22	hsa-miR-20a	C12orf65
hsa-miR-150	PSMC1	hsa-miR-20a	DDX55
hsa-miR-150	DYNC1H1	hsa-miR-20a	UBC
hsa-miR-150	EIF5	hsa-miR-20a	RIMBP2
hsa-miR-150	TRPM1	hsa-miR-20a	ULK1
hsa-miR-150	C15orf29	hsa-miR-20a	SACS
hsa-miR-150	SNAP23	hsa-miR-20a	ATP12A
hsa-miR-150	TUBGCP4	hsa-miR-20a	FAM123A
hsa-miR-150	EIF3J	hsa-miR-20a	NUPL1
hsa-miR-150	DUOX2	hsa-miR-20a	RNF6
hsa-miR-150	SHC4	hsa-miR-20a	WASF3
hsa-miR-150	MYO5A	hsa-miR-20a	SLC46A3
hsa-miR-150	RAB8B	hsa-miR-20a	KATNAL1
hsa-miR-150	PARP16	hsa-miR-20a	NBEA
hsa-miR-150	AAGAB	hsa-miR-20a	SPG20
hsa-miR-150	CALML4	hsa-miR-20a	SERTM1
hsa-miR-150	GLCE	hsa-miR-20a	RFXAP
hsa-miR-150	UBL7	hsa-miR-20a	LHFP
hsa-miR-150	NEIL1	hsa-miR-20a	NAA16
hsa-miR-150	MAN2A2	hsa-miR-20a	KIAA0564
hsa-miR-150	SV2B	hsa-miR-20a	AKAP11
hsa-miR-150	CHD2	hsa-miR-20a	TNFSF11
hsa-miR-150	NR2F2	hsa-miR-20a	KCTD4
hsa-miR-150	HN1L	hsa-miR-20a	RB1
hsa-miR-150	PKMYT1	hsa-miR-20a	FNDC3A
hsa-miR-150	RBFOX1	hsa-miR-20a	KPNA3
hsa-miR-150	TNFRSF17	hsa-miR-20a	INTS6
hsa-miR-150	FOPNL	hsa-miR-20a	WDFY2
hsa-miR-150	ITPRIPL2	hsa-miR-20a	KLF12
hsa-miR-150	COG7	hsa-miR-20a	COMMD6
hsa-miR-150	UBFD1	hsa-miR-20a	FBXL3
hsa-miR-150	ERN2	hsa-miR-20a	IPO5
hsa-miR-150	TNRC6A	hsa-miR-20a	DOCK9
hsa-miR-150	PRRT2	hsa-miR-20a	EFNB2
hsa-miR-150	TRIM72	hsa-miR-20a	ABHD13
hsa-miR-150	ITGAX	hsa-miR-20a	COL4A1
hsa-miR-150	HEATR3	hsa-miR-20a	ARHGEF7
hsa-miR-150	PAPD5	hsa-miR-20a	TUBGCP3
hsa-miR-150	FTO	hsa-miR-20a	ATP11A
hsa-miR-150	SLC38A7	hsa-miR-20a	MCF2L
hsa-miR-150	CYB5B	hsa-miR-20a	LAMP1
hsa-miR-150	NFAT5	hsa-miR-20a	GRTP1
hsa-miR-150	AARS	hsa-miR-20a	UPF3A
hsa-miR-150	KIAA0174	hsa-miR-20a	ARHGEF40
hsa-miR-150	ZNRF1	hsa-miR-20a	JUB
hsa-miR-150	IRF8	hsa-miR-20a	BCL2L2
hsa-miR-150	MAP1LC3B	hsa-miR-20a	IRF9
hsa-miR-150	PAFAH1B1	hsa-miR-20a	ARHGAP5
hsa-miR-150	ARRB2	hsa-miR-20a	NPAS3
hsa-miR-150	KIF1C	hsa-miR-20a	EGLN3
hsa-miR-150	DVL2	hsa-miR-20a	CFL2
hsa-miR-150	ZBTB4	hsa-miR-20a	FAM177A1
hsa-miR-150	TP53	hsa-miR-20a	BRMS1L
hsa-miR-150	VAMP2	hsa-miR-20a	FOXA1
hsa-miR-150	GRAP	hsa-miR-20a	C14orf28
hsa-miR-150	WSB1	hsa-miR-20a	KLHL28
hsa-miR-150	NLK	hsa-miR-20a	METTL21D
hsa-miR-150	UNC119	hsa-miR-20a	NIN
hsa-miR-150	KIAA0100	hsa-miR-20a	FRMD6
hsa-miR-150	NEK8	hsa-miR-20a	PTGDR
hsa-miR-150	CPD	hsa-miR-20a	GPR137C
hsa-miR-150	GOSR1	hsa-miR-20a	PSMC6
hsa-miR-150	PSMD11	hsa-miR-20a	STYX
hsa-miR-150	SLC35G3	hsa-miR-20a	DDHD1
hsa-miR-150	SLFN13	hsa-miR-20a	GMFB
hsa-miR-150	GGNBP2	hsa-miR-20a	ATG14
hsa-miR-150	SRCIN1	hsa-miR-20a	NAA30
hsa-miR-150	MLLT6	hsa-miR-20a	C14orf105
hsa-miR-150	HSD17B1	hsa-miR-20a	ARID4A
hsa-miR-150	AOC3	hsa-miR-20a	PPM1A
hsa-miR-150	TMEM101	hsa-miR-20a	TRMT5
hsa-miR-150	MRPL10	hsa-miR-20a	PRKCH
hsa-miR-150	CBX1	hsa-miR-20a	HIF1A
hsa-miR-150	SKAP1	hsa-miR-20a	HIF1A
hsa-miR-150	UBE2Z	hsa-miR-20a	SYT16
hsa-miR-150	IGF2BP1	hsa-miR-20a	KCNH5
hsa-miR-150	KAT7	hsa-miR-20a	SYNE2
hsa-miR-150	ITGA3	hsa-miR-20a	SYNE2
hsa-miR-150	XYLT2	hsa-miR-20a	AKAP5
hsa-miR-150	MRPL27	hsa-miR-20a	ATP6V1D
hsa-miR-150	CACNA1G	hsa-miR-20a	EIF2S1
hsa-miR-150	MBTD1	hsa-miR-20a	ZFYVE26
hsa-miR-150	MMD	hsa-miR-20a	SMOC1
hsa-miR-150	VEZF1	hsa-miR-20a	MED6
hsa-miR-150	PPM1E	hsa-miR-20a	TTC9
hsa-miR-150	VMP1	hsa-miR-20a	MAP3K9
hsa-miR-150	STRADA	hsa-miR-20a	DPF3
hsa-miR-150	CCDC47	hsa-miR-20a	PTGR2
hsa-miR-150	SMARCD2	hsa-miR-20a	NEK9
hsa-miR-150	TEX2	hsa-miR-20a	ISM2
hsa-miR-150	WIPI1	hsa-miR-20a	SPTLC2
hsa-miR-150	FDXR	hsa-miR-20a	CEP128
hsa-miR-150	RECQL5	hsa-miR-20a	PTPN21
hsa-miR-150	EXOC7	hsa-miR-20a	RPS6KA5
hsa-miR-150	SRSF2	hsa-miR-20a	TRIP11
hsa-miR-150	GAA	hsa-miR-20a	SLC24A4
hsa-miR-150	RFNG	hsa-miR-20a	BTBD7
hsa-miR-150	PPP4R1	hsa-miR-20a	COX8C
hsa-miR-150	VAPA	hsa-miR-20a	ATG2B
hsa-miR-150	C18orf32	hsa-miR-20a	PAPOLA
hsa-miR-150	CCDC68	hsa-miR-20a	VRK1
hsa-miR-150	ONECUT2	hsa-miR-20a	C14orf177
hsa-miR-150	CD226	hsa-miR-20a	BCL11B
hsa-miR-150	ZADH2	hsa-miR-20a	ANKRD9
hsa-miR-150	STK11	hsa-miR-20a	KLC1
hsa-miR-150	GADD45B	hsa-miR-20a	ZFYVE21
hsa-miR-150	NCLN	hsa-miR-20a	NIPA1
hsa-miR-150	ZFR2	hsa-miR-20a	UBE3A
hsa-miR-150	TMIGD2	hsa-miR-20a	FAM189A1
hsa-miR-150	LDLR	hsa-miR-20a	CHRNA7
hsa-miR-150	ZNF625	hsa-miR-20a	TRPM1
hsa-miR-150	TNPO2	hsa-miR-20a	GPR176
hsa-miR-150	FAM32A	hsa-miR-20a	EIF2AK4
hsa-miR-150	ZNF430	hsa-miR-20a	BAHD1
hsa-miR-150	C19orf12	hsa-miR-20a	RHOV
hsa-miR-150	KIRREL2	hsa-miR-20a	INO80
hsa-miR-150	THAP8	hsa-miR-20a	ZFP106
hsa-miR-150	ZFP30	hsa-miR-20a	SNAP23
hsa-miR-150	SAMD4B	hsa-miR-20a	LRRC57
hsa-miR-150	ZNF226	hsa-miR-20a	CDAN1
hsa-miR-150	ZNF229	hsa-miR-20a	TUBGCP4
hsa-miR-150	PVRL2	hsa-miR-20a	CASC4
hsa-miR-150	GEMIN7	hsa-miR-20a	CTDSPL2
hsa-miR-150	PPP1R13L	hsa-miR-20a	SLC28A2
hsa-miR-150	OPA3	hsa-miR-20a	PLDN
hsa-miR-150	NTN5	hsa-miR-20a	FGF7
hsa-miR-150	RASIP1	hsa-miR-20a	GABPB1
hsa-miR-150	PPFIA3	hsa-miR-20a	GNB5
hsa-miR-150	TRPM4	hsa-miR-20a	ARPP19
hsa-miR-150	PTOV1	hsa-miR-20a	AQP9
hsa-miR-150	AKT1S1	hsa-miR-20a	SLTM
hsa-miR-150	ATF5	hsa-miR-20a	BNIP2
hsa-miR-150	ZNF614	hsa-miR-20a	VPS13C
hsa-miR-150	ZNF616	hsa-miR-20a	C2CD4A
hsa-miR-150	PPP2R1A	hsa-miR-20a	RAB8B
hsa-miR-150	ZNF611	hsa-miR-20a	USP3
hsa-miR-150	ZNF331	hsa-miR-20a	FBXL22
hsa-miR-150	TTYH1	hsa-miR-20a	DAPK2
hsa-miR-150	NLRP7	hsa-miR-20a	SNX22
hsa-miR-150	RPL28	hsa-miR-20a	CSNK1G1
hsa-miR-150	GALP	hsa-miR-20a	PLEKHO2
hsa-miR-150	ZNF582	hsa-miR-20a	RASL12
hsa-miR-150	ZNF667	hsa-miR-20a	RAB11A
hsa-miR-150	ZNF671	hsa-miR-20a	DIS3L
hsa-miR-150	ATAD2B	hsa-miR-20a	SMAD6
hsa-miR-150	DNMT3A	hsa-miR-20a	CALML4
hsa-miR-150	GTF3C2	hsa-miR-20a	CORO2B
hsa-miR-150	SLC8A1	hsa-miR-20a	KIF23
hsa-miR-150	SMEK2	hsa-miR-20a	THSD4
hsa-miR-150	CEP68	hsa-miR-20a	PARP6
hsa-miR-150	ALMS1	hsa-miR-20a	SCAMP2
hsa-miR-150	TET3	hsa-miR-20a	C15orf17
hsa-miR-150	FAM176A	hsa-miR-20a	UBE2Q2
hsa-miR-150	ELMOD3	hsa-miR-20a	DNAJA4
hsa-miR-150	KRCC1	hsa-miR-20a	CHRNA5
hsa-miR-150	EIF2AK3	hsa-miR-20a	MORF4L1
hsa-miR-150	ANKRD57	hsa-miR-20a	WDR73
hsa-miR-150	SLC20A1	hsa-miR-20a	AKAP13
hsa-miR-150	IL1A	hsa-miR-20a	NTRK3
hsa-miR-150	MKI67IP	hsa-miR-20a	ABHD2
hsa-miR-150	FAM168B	hsa-miR-20a	SEMA4B
hsa-miR-150	KCNJ3	hsa-miR-20a	IQGAP1
hsa-miR-150	UPP2	hsa-miR-20a	FURIN
hsa-miR-150	PKP4	hsa-miR-20a	RCCD1
hsa-miR-150	STK39	hsa-miR-20a	SV2B
hsa-miR-150	SP5	hsa-miR-20a	ST8SIA2
hsa-miR-150	SCRN3	hsa-miR-20a	CHD2
hsa-miR-150	UBE2E3	hsa-miR-20a	RGMA
hsa-miR-150	STAT4	hsa-miR-20a	LRRK1
hsa-miR-150	MYO1B	hsa-miR-20a	SOLH
hsa-miR-150	CFLAR	hsa-miR-20a	UNKL
hsa-miR-150	FAM117B	hsa-miR-20a	CRAMP1L
hsa-miR-150	CREB1	hsa-miR-20a	PKD1
hsa-miR-150	UNC80	hsa-miR-20a	PGP
hsa-miR-150	CNPPD1	hsa-miR-20a	PKMYT1
hsa-miR-150	ATG9A	hsa-miR-20a	ZNF597
hsa-miR-150	DNPEP	hsa-miR-20a	ZNF500
hsa-miR-150	COL4A4	hsa-miR-20a	ABAT
hsa-miR-150	GIGYF2	hsa-miR-20a	C16orf72
hsa-miR-150	CXCR7	hsa-miR-20a	LITAF
hsa-miR-150	ZCCHC3	hsa-miR-20a	RUNDC2A
hsa-miR-150	TBC1D20	hsa-miR-20a	MKL2
hsa-miR-150	NKX2-4	hsa-miR-20a	RRN3
hsa-miR-150	NKX2-2	hsa-miR-20a	SMG1
hsa-miR-150	ABHD12	hsa-miR-20a	ITPRIPL2
hsa-miR-150	GINS1	hsa-miR-20a	DCUN1D3
hsa-miR-150	ZNF341	hsa-miR-20a	LYRM1
hsa-miR-150	GDF5	hsa-miR-20a	USP31
hsa-miR-150	PHF20	hsa-miR-20a	COG7
hsa-miR-150	SLC32A1	hsa-miR-20a	UBFD1
hsa-miR-150	R3HDML	hsa-miR-20a	AC130454.2
hsa-miR-150	ZNF335	hsa-miR-20a	TNRC6A
hsa-miR-150	SLC12A5	hsa-miR-20a	QPRT
hsa-miR-150	PREX1	hsa-miR-20a	TAOK2
hsa-miR-150	PTGIS	hsa-miR-20a	TGFB1I1
hsa-miR-150	OLIG2	hsa-miR-20a	ORC6
hsa-miR-150	ITSN1	hsa-miR-20a	NETO2
hsa-miR-150	DOPEY2	hsa-miR-20a	ITFG1
hsa-miR-150	LSS	hsa-miR-20a	LONP2
hsa-miR-150	PISD	hsa-miR-20a	TMEM188
hsa-miR-150	IL2RB	hsa-miR-20a	CYLD
hsa-miR-150	CBY1	hsa-miR-20a	SALL1
hsa-miR-150	EP300	hsa-miR-20a	CHD9
hsa-miR-150	BRD1	hsa-miR-20a	RBL2
hsa-miR-150	BHLHE40	hsa-miR-20a	AKTIP
hsa-miR-150	SETD5	hsa-miR-20a	MMP2
hsa-miR-150	LHFPL4	hsa-miR-20a	DYNC1LI2
hsa-miR-150	FANCD2	hsa-miR-20a	CBFB
hsa-miR-150	IRAK2	hsa-miR-20a	C16orf70
hsa-miR-150	NR1D2	hsa-miR-20a	ZDHHC1
hsa-miR-150	CMTM6	hsa-miR-20a	SNTB2
hsa-miR-150	SUSD5	hsa-miR-20a	NFAT5
hsa-miR-150	ARPP21	hsa-miR-20a	FTSJD1
hsa-miR-150	CTNNB1	hsa-miR-20a	MARVELD3
hsa-miR-150	CYP8B1	hsa-miR-20a	PHLPP2
hsa-miR-150	CCR1	hsa-miR-20a	AP1G1
hsa-miR-150	KIF9	hsa-miR-20a	DHODH
hsa-miR-150	ARIH2	hsa-miR-20a	GAN
hsa-miR-150	BSN	hsa-miR-20a	MBTPS1
hsa-miR-150	GLYCTK	hsa-miR-20a	KIAA0513
hsa-miR-150	CACNA1D	hsa-miR-20a	FOXF1
hsa-miR-150	FOXP1	hsa-miR-20a	FBXO31
hsa-miR-150	EPHA6	hsa-miR-20a	SPIRE2
hsa-miR-150	TOMM70A	hsa-miR-20a	FAM57A
hsa-miR-150	CBLB	hsa-miR-20a	CRK
hsa-miR-150	BTLA	hsa-miR-20a	PITPNA
hsa-miR-150	COX17	hsa-miR-20a	PAFAH1B1
hsa-miR-150	DIRC2	hsa-miR-20a	CTNS
hsa-miR-150	SEMA5B	hsa-miR-20a	ANKFY1
hsa-miR-150	HEG1	hsa-miR-20a	GGT6
hsa-miR-150	ZNF148	hsa-miR-20a	MINK1
hsa-miR-150	C3orf37	hsa-miR-20a	CAMTA2
hsa-miR-150	TMCC1	hsa-miR-20a	ZFP3
hsa-miR-150	NPHP3	hsa-miR-20a	USP6
hsa-miR-150	C3orf58	hsa-miR-20a	RABEP1
hsa-miR-150	PFN2	hsa-miR-20a	DERL2
hsa-miR-150	DHX36	hsa-miR-20a	FBXO39
hsa-miR-150	AC078802.1	hsa-miR-20a	SLC2A4
hsa-miR-150	ABCF3	hsa-miR-20a	ZBTB4
hsa-miR-150	LIPH	hsa-miR-20a	CD68
hsa-miR-150	MASP1	hsa-miR-20a	KDM6B
hsa-miR-150	HRASLS	hsa-miR-20a	KRBA2
hsa-miR-150	GAK	hsa-miR-20a	NDEL1
hsa-miR-150	WDR1	hsa-miR-20a	RASD1
hsa-miR-150	FBXL5	hsa-miR-20a	C17orf39
hsa-miR-150	BST1	hsa-miR-20a	SPECC1
hsa-miR-150	TAPT1	hsa-miR-20a	TNFAIP1
hsa-miR-150	NCAPG	hsa-miR-20a	NEK8
hsa-miR-150	PPARGC1A	hsa-miR-20a	TRAF4
hsa-miR-150	KLHL5	hsa-miR-20a	SSH2
hsa-miR-150	SLAIN2	hsa-miR-20a	EFCAB5
hsa-miR-150	TMPRSS11A	hsa-miR-20a	GOSR1
hsa-miR-150	SLC4A4	hsa-miR-20a	RHOT1
hsa-miR-150	EREG	hsa-miR-20a	MYO1D
hsa-miR-150	USO1	hsa-miR-20a	CCL1
hsa-miR-150	AFF1	hsa-miR-20a	ZNF830
hsa-miR-150	EIF4E	hsa-miR-20a	AP2B1
hsa-miR-150	METAP1	hsa-miR-20a	MYO19
hsa-miR-150	ADH6	hsa-miR-20a	SRCIN1
hsa-miR-150	LARP7	hsa-miR-20a	MLLT6
hsa-miR-150	TMEM155	hsa-miR-20a	LASP1
hsa-miR-150	SLC7A11	hsa-miR-20a	ORMDL3
hsa-miR-150	ARHGAP10	hsa-miR-20a	THRA
hsa-miR-150	LRAT	hsa-miR-20a	MSL1
hsa-miR-150	NAF1	hsa-miR-20a	RAPGEFL1
hsa-miR-150	MRPL36	hsa-miR-20a	WIPF2
hsa-miR-150	MARCH6	hsa-miR-20a	KRT23
hsa-miR-150	BASP1	hsa-miR-20a	STAT3
hsa-miR-150	TARS	hsa-miR-20a	FAM134C
hsa-miR-150	RICTOR	hsa-miR-20a	EZH1
hsa-miR-150	DAB2	hsa-miR-20a	BECN1
hsa-miR-150	RAB3C	hsa-miR-20a	RUNDC1
hsa-miR-150	PIK3R1	hsa-miR-20a	NBR1
hsa-miR-150	GTF2H2	hsa-miR-20a	TMUB2
hsa-miR-150	MAP1B	hsa-miR-20a	UBTF
hsa-miR-150	RASGRF2	hsa-miR-20a	RUNDC3A
hsa-miR-150	CAST	hsa-miR-20a	C17orf104
hsa-miR-150	APC	hsa-miR-20a	MAP3K14
hsa-miR-150	COMMD10	hsa-miR-20a	CBX1
hsa-miR-150	ADAMTS19	hsa-miR-20a	SNX11
hsa-miR-150	AFF4	hsa-miR-20a	HOXB13
hsa-miR-150	KLHL3	hsa-miR-20a	IGF2BP1
hsa-miR-150	FAM53C	hsa-miR-20a	ZNF652
hsa-miR-150	EGR1	hsa-miR-20a	FAM117A
hsa-miR-150	ETF1	hsa-miR-20a	MBTD1
hsa-miR-150	ZMAT2	hsa-miR-20a	CA10
hsa-miR-150	ARAP3	hsa-miR-20a	HLF
hsa-miR-150	FBXO38	hsa-miR-20a	TMEM100
hsa-miR-150	SH3TC2	hsa-miR-20a	TRIM37
hsa-miR-150	NDST1	hsa-miR-20a	PRR11
hsa-miR-150	NDST1	hsa-miR-20a	GDPD1
hsa-miR-150	CCDC69	hsa-miR-20a	YPEL2
hsa-miR-150	GLRA1	hsa-miR-20a	USP32
hsa-miR-150	ADAM19	hsa-miR-20a	TANC2
hsa-miR-150	TTC1	hsa-miR-20a	KCNH6
hsa-miR-150	GABRG2	hsa-miR-20a	MAP3K3
hsa-miR-150	KCNIP1	hsa-miR-20a	DDX5
hsa-miR-150	CPEB4	hsa-miR-20a	PRKCA
hsa-miR-150	ZNF454	hsa-miR-20a	KPNA2
hsa-miR-150	MAPK9	hsa-miR-20a	PRKAR1A
hsa-miR-150	GCM2	hsa-miR-20a	ABCA10
hsa-miR-150	RANBP9	hsa-miR-20a	HN1
hsa-miR-150	JARID2	hsa-miR-20a	UNK
hsa-miR-150	E2F3	hsa-miR-20a	SRSF2
hsa-miR-150	ZNF322	hsa-miR-20a	TIMP2
hsa-miR-150	GABBR1	hsa-miR-20a	NPLOC4
hsa-miR-150	PPP1R10	hsa-miR-20a	CCDC137
hsa-miR-150	TUBB	hsa-miR-20a	LRRC45
hsa-miR-150	DDAH2	hsa-miR-20a	YES1
hsa-miR-150	SLC39A7	hsa-miR-20a	ZFP161
hsa-miR-150	SYNGAP1	hsa-miR-20a	RAB12
hsa-miR-150	MAPK13	hsa-miR-20a	ANKRD12
hsa-miR-150	ZFAND3	hsa-miR-20a	APCDD1
hsa-miR-150	GLP1R	hsa-miR-20a	C18orf19
hsa-miR-150	C6orf64	hsa-miR-20a	GATA6
hsa-miR-150	KCNK5	hsa-miR-20a	CABLES1
hsa-miR-150	LRFN2	hsa-miR-20a	NPC1
hsa-miR-150	RPL7L1	hsa-miR-20a	ANKRD29
hsa-miR-150	PTK7	hsa-miR-20a	LAMA3
hsa-miR-150	XPO5	hsa-miR-20a	TTC39C
hsa-miR-150	POLH	hsa-miR-20a	AQP4
hsa-miR-150	VEGFA	hsa-miR-20a	DSG4
hsa-miR-150	TDRD6	hsa-miR-20a	TTR
hsa-miR-150	PKHD1	hsa-miR-20a	B4GALT6
hsa-miR-150	PHF3	hsa-miR-20a	RNF125
hsa-miR-150	MTO1	hsa-miR-20a	NOL4
hsa-miR-150	GJB7	hsa-miR-20a	SMAD7
hsa-miR-150	CD164	hsa-miR-20a	C18orf32
hsa-miR-150	TUBE1	hsa-miR-20a	MAPK4
hsa-miR-150	RNF146	hsa-miR-20a	SMAD4
hsa-miR-150	PTPRK	hsa-miR-20a	NEDD4L
hsa-miR-150	MYB	hsa-miR-20a	ZNF532
hsa-miR-150	AHI1	hsa-miR-20a	PMAIP1
hsa-miR-150	PEX7	hsa-miR-20a	KIAA1468
hsa-miR-150	OLIG3	hsa-miR-20a	VPS4B
hsa-miR-150	PERP	hsa-miR-20a	TMX3
hsa-miR-150	RAB32	hsa-miR-20a	SOCS6
hsa-miR-150	UST	hsa-miR-20a	ZNF236
hsa-miR-150	C6orf97	hsa-miR-20a	MIER2
hsa-miR-150	WTAP	hsa-miR-20a	STK11
hsa-miR-150	SLC22A2	hsa-miR-20a	MIDN
hsa-miR-150	SCIN	hsa-miR-20a	MEX3D
hsa-miR-150	C7orf31	hsa-miR-20a	MKNK2
hsa-miR-150	HOXA2	hsa-miR-20a	AP3D1
hsa-miR-150	NEUROD6	hsa-miR-20a	ZBTB7A
hsa-miR-150	INHBA	hsa-miR-20a	CHAF1A
hsa-miR-150	SUN3	hsa-miR-20a	PLIN5
hsa-miR-150	COBL	hsa-miR-20a	TNFAIP8L1
hsa-miR-150	POM121	hsa-miR-20a	PLIN3
hsa-miR-150	ABHD11	hsa-miR-20a	TNFSF14
hsa-miR-150	GTF2IRD2	hsa-miR-20a	TRIP10
hsa-miR-150	GTF2IRD2B	hsa-miR-20a	SH2D3A
hsa-miR-150	POM121C	hsa-miR-20a	ARHGEF18
hsa-miR-150	SEMA3A	hsa-miR-20a	OR7D2
hsa-miR-150	CDK14	hsa-miR-20a	ZNF426
hsa-miR-150	GATAD1	hsa-miR-20a	ICAM4
hsa-miR-150	CALCR	hsa-miR-20a	LDLR
hsa-miR-150	DLX6	hsa-miR-20a	CNN1
hsa-miR-150	LMTK2	hsa-miR-20a	ZNF625
hsa-miR-150	MOGAT3	hsa-miR-20a	ZNF791
hsa-miR-150	SYPL1	hsa-miR-20a	CC2D1A
hsa-miR-150	NRCAM	hsa-miR-20a	PODNL1
hsa-miR-150	IFRD1	hsa-miR-20a	CYP4F3
hsa-miR-150	PPP1R3A	hsa-miR-20a	SLC35E1
hsa-miR-150	ARF5	hsa-miR-20a	SIN3B
hsa-miR-150	LRRC4	hsa-miR-20a	F2RL3
hsa-miR-150	C7orf68	hsa-miR-20a	HAUS8
hsa-miR-150	CALU	hsa-miR-20a	PIK3R2
hsa-miR-150	AKR1D1	hsa-miR-20a	SUGP2
hsa-miR-150	ZC3HAV1	hsa-miR-20a	NR2C2AP
hsa-miR-150	SLC35G5	hsa-miR-20a	ZNF431
hsa-miR-150	ZDHHC2	hsa-miR-20a	C19orf2
hsa-miR-150	NEFM	hsa-miR-20a	ZNF536
hsa-miR-150	KCTD9	hsa-miR-20a	TSHZ3
hsa-miR-150	ADRA1A	hsa-miR-20a	DPY19L3
hsa-miR-150	PTK2B	hsa-miR-20a	RGS9BP
hsa-miR-150	PPP2CB	hsa-miR-20a	C19orf40
hsa-miR-150	FGFR1	hsa-miR-20a	GRAMD1A
hsa-miR-150	GOLGA7	hsa-miR-20a	AD000671.1
hsa-miR-150	ATP6V1H	hsa-miR-20a	SIPA1L3
hsa-miR-150	PLAG1	hsa-miR-20a	PAF1
hsa-miR-150	CLVS1	hsa-miR-20a	NUMBL
hsa-miR-150	BHLHE22	hsa-miR-20a	CIC
hsa-miR-150	IL7	hsa-miR-20a	PLAUR
hsa-miR-150	CHMP4C	hsa-miR-20a	MARK4
hsa-miR-150	TMEM55A	hsa-miR-20a	VASP
hsa-miR-150	SDC2	hsa-miR-20a	SULT2A1
hsa-miR-150	TRPS1	hsa-miR-20a	SPACA4
hsa-miR-150	ZHX2	hsa-miR-20a	KCNA7
hsa-miR-150	TRIB1	hsa-miR-20a	LIN7B
hsa-miR-150	SLA	hsa-miR-20a	SLC17A7
hsa-miR-150	ZFAT	hsa-miR-20a	TBC1D17
hsa-miR-150	FAM135B	hsa-miR-20a	ZNF473
hsa-miR-150	PPAPDC2	hsa-miR-20a	ZNF468
hsa-miR-150	RANBP6	hsa-miR-20a	LILRB1
hsa-miR-150	GLDC	hsa-miR-20a	ZIM3
hsa-miR-150	CNTLN	hsa-miR-20a	PXDN
hsa-miR-150	TEK	hsa-miR-20a	MYT1L
hsa-miR-150	ACO1	hsa-miR-20a	RSAD2
hsa-miR-150	NOL6	hsa-miR-20a	YWHAQ
hsa-miR-150	UBE2R2	hsa-miR-20a	KLF11
hsa-miR-150	UBAP2	hsa-miR-20a	RRM2
hsa-miR-150	DCAF12	hsa-miR-20a	ROCK2
hsa-miR-150	PIGO	hsa-miR-20a	MYCN
hsa-miR-150	ALDH1B1	hsa-miR-20a	OSR1
hsa-miR-150	MAMDC2	hsa-miR-20a	LAPTM4A
hsa-miR-150	RORB	hsa-miR-20a	UBXN2A
hsa-miR-150	TLE4	hsa-miR-20a	CENPO
hsa-miR-150	IARS	hsa-miR-20a	DNAJC27
hsa-miR-150	PTCH1	hsa-miR-20a	RAB10
hsa-miR-150	TMOD1	hsa-miR-20a	DPYSL5
hsa-miR-150	TGFBR1	hsa-miR-20a	MAPRE3
hsa-miR-150	ERP44	hsa-miR-20a	SLC30A3
hsa-miR-150	SMC2	hsa-miR-20a	NRBP1
hsa-miR-150	RAD23B	hsa-miR-20a	CLIP4
hsa-miR-150	ROD1	hsa-miR-20a	CAPN13
hsa-miR-150	RGS3	hsa-miR-20a	EHD3
hsa-miR-150	MEGF9	hsa-miR-20a	CRIM1
hsa-miR-150	ST6GALNAC6	hsa-miR-20a	STRN
hsa-miR-150	GLE1	hsa-miR-20a	C2orf56
hsa-miR-150	ZER1	hsa-miR-20a	SOS1
hsa-miR-150	TBC1D13	hsa-miR-20a	COX7A2L
hsa-miR-150	GPR107	hsa-miR-20a	EPAS1
hsa-miR-150	FUBP3	hsa-miR-20a	CRIPT
hsa-miR-150	TTF1	hsa-miR-20a	FBXO11
hsa-miR-150	VAV2	hsa-miR-20a	KLRAQ1
hsa-miR-150	COL5A1	hsa-miR-20a	SPTBN1
hsa-miR-150	CAMSAP1	hsa-miR-20a	SMEK2
hsa-miR-150	FBXW5	hsa-miR-20a	REL
hsa-miR-150	CSF2RA	hsa-miR-20a	USP34
hsa-miR-150	TRAPPC2	hsa-miR-20a	TMEM17
hsa-miR-150	REPS2	hsa-miR-20a	OTX1
hsa-miR-150	SCML2	hsa-miR-20a	SERTAD2
hsa-miR-150	CXorf23	hsa-miR-20a	CEP68
hsa-miR-150	PHF16	hsa-miR-20a	PPP3R1
hsa-miR-150	ARAF	hsa-miR-20a	FBXO48
hsa-miR-150	ELK1	hsa-miR-20a	ANTXR1
hsa-miR-150	ZNF182	hsa-miR-20a	GMCL1
hsa-miR-150	SLC35A2	hsa-miR-20a	MXD1
hsa-miR-150	GRIPAP1	hsa-miR-20a	NAGK
hsa-miR-150	PLP2	hsa-miR-20a	CYP26B1
hsa-miR-150	CCDC22	hsa-miR-20a	SFXN5
hsa-miR-150	IQSEC2	hsa-miR-20a	RAB11FIP5
hsa-miR-150	HSD17B10	hsa-miR-20a	TET3
hsa-miR-150	PHF8	hsa-miR-20a	TCF7L1
hsa-miR-150	ITIH5L	hsa-miR-20a	TGOLN2
hsa-miR-150	EDA	hsa-miR-20a	RMND5A
hsa-miR-150	PDZD11	hsa-miR-20a	DUSP2
hsa-miR-150	KIF4A	hsa-miR-20a	TMEM127
[truncated: 20,816 more rows]
