# Supplementary material for: Detecting Key Genes Regulated by miRNAs in Dysfunctional Crosstalk Pathway of Myasthenia Gravis
Source: Biomed Res Int. 2015 Feb 1;2015:724715. doi: 10.1155/2015/724715 (PMC4331476; doi:10.1155/2015/724715)
Supplement: Supplementary file 1 — Table S1: MiRNAs and mRNAs differentially expressed in MG Table S1 lists the miRNAs and mRNAs differentially expressed in MG. A total of 46 differentially expressed miRNAs were identified, including 21 upregulated miRNAs and 25 downregulated miRNAs. A total of 1135 differentially expressed mRNAs were obtained, including 551 upregulated mRNAs and 584 downregulated mRNAs. Table S2: The predicted targets of differentially expressed miRNAs Table S2 lists the predicted targets of differentially expressed miRNAs. A total of 46 differentially expressed miRNAs, 9567 predicted targets, 34963 miRNA-target regulations were obtained. Table S3: Pathways enriched in differentially expressed mRNAs and predicted target genes of differentially expressed miRNAs Table S3 presents significant pathways enriched by differentially expressed mRNAs and predicted genes of differentially expressed miRNAs. The up- and down-regulated mRNAs were significantly enriched in 13 pathways (define as P1) and 8 pathways (define as P2), respectively. The predicted targets of up- and down-regulated miRNAs were significantly enriched in 64 pathways (define as P3) and 68 pathways (define as P4), respectively. [file 724715.f1.zip › Optional Supplementary Materials/Table S3.xlsx]

## Sheet: Sheet1
Table S3 Significant pathways enriched by differentially expressed mRNAs and predicted genes of differentially expressed miRNAs
Significant pathways enriched by upregulated mRNAs(define as P1)
Term	PValue	Genes
hsa04612:Antigen processing and presentation	7.76808e-05	3113, 3112, 3117, 3821, 3119, 6892, 8625, 3309, 3308, 821, 972, 1520, 3107, 3122
hsa05332:Graft-versus-host disease	0.000290826	3113, 3112, 3117, 356, 3119, 3821, 3107, 3553, 3122
hsa04940:Type I diabetes mellitus	0.000495863	3113, 3112, 3117, 356, 3119, 3107, 3553, 3382, 3122
hsa05416:Viral myocarditis	0.00123752	595, 3113, 3112, 3117, 4627, 3119, 3107, 71, 3683, 836, 3122
hsa05330:Allograft rejection	0.00509687	3113, 3112, 3117, 356, 3119, 3107, 3122
hsa04672:Intestinal immune network for IgA production	0.00612642	3113, 6387, 3112, 3117, 3119, 608, 3122, 3695
hsa05310:Asthma	0.00899605	3113, 3596, 3112, 3117, 3119, 3122
hsa04640:Hematopoietic cell lineage	0.0153724	3570, 1435, 931, 909, 928, 2993, 3553, 960, 1380, 3122
hsa04670:Leukocyte transendothelial migration	0.0175896	6093, 6387, 4267, 5781, 1500, 7414, 71, 399, 1535, 3683, 6494, 50848
hsa03050:Proteasome	0.0185717	5689, 5719, 5704, 5710, 5705, 5702, 9861
hsa05320:Autoimmune thyroid disease	0.026825	3113, 3112, 3117, 356, 3119, 3107, 3122
hsa04514:Cell adhesion molecules (CAMs)	0.0366419	57863, 3113, 3112, 4267, 3117, 3119, 3107, 3683, 6900, 50848, 3122, 3695
hsa05216:Thyroid cancer	0.0403796	595, 7175, 8031, 6932, 7170
Significant pathways enriched by downregulated mRNAs(define as P2)
Term	PValue	Genes
hsa05212:Pancreatic cancer	0.00202039	5880, 5599, 5898, 7039, 598, 5894, 6772, 5888, 4790, 5228, 5594
hsa05010:Alzheimer's disease	0.0106155	824, 2905, 4706, 489, 4711, 5530, 522, 10476, 4695, 1349, 1347, 1345, 7385, 5594, 7384, 514
hsa05016:Huntington's disease	0.0115982	6648, 2033, 4706, 6874, 4711, 522, 10476, 9586, 160, 4695, 1349, 7350, 1347, 1345, 7385, 7384, 514
hsa00190:Oxidative phosphorylation	0.0207638	4706, 51382, 4711, 522, 521, 10476, 4695, 1349, 1347, 1345, 7385, 7384, 514
hsa05215:Prostate cancer	0.0253452	5155, 7039, 5156, 5894, 3320, 9586, 2033, 4790, 2475, 5594
hsa04510:Focal adhesion	0.0298741	8515, 824, 5880, 5599, 5155, 5156, 5894, 3611, 859, 10627, 387, 5501, 3915, 23396, 5228, 83660, 5594
hsa05012:Parkinson's disease	0.0413529	522, 10476, 4706, 7327, 4695, 1349, 1347, 1345, 7385, 4711, 514, 7384
hsa04720:Long-term potentiation	0.0423335	10411, 2905, 5894, 5501, 2033, 2891, 5594, 5530
Significant pathways enriched by predicted genes of upregulated miRNAs(define as P3)
miRNAs	Term	PValue
hsa-miR-365	hsa00020:Citrate cycle (TCA cycle)	0.00751569
hsa-miR-494	hsa00310:Lysine degradation	0.00677379
hsa-miR-494	hsa00500:Starch and sucrose metabolism	0.0176504
hsa-miR-494	hsa00512:O-Glycan biosynthesis	0.0425649
hsa-miR-197	hsa00533:Keratan sulfate biosynthesis	0.0417654
hsa-miR-23a	hsa00534:Heparan sulfate biosynthesis	0.0229004
hsa-miR-27a	hsa00561:Glycerolipid metabolism	0.0424826
hsa-miR-494	hsa00760:Nicotinate and nicotinamide metabolism	0.0174594
hsa-miR-129-3p	hsa01040:Biosynthesis of unsaturated fatty acids	0.0158751
hsa-miR-23a	hsa01040:Biosynthesis of unsaturated fatty acids	0.0489356
hsa-miR-23a	hsa03018:RNA degradation	0.0280001
hsa-miR-21	hsa04010:MAPK signaling pathway	5.25811e-06
hsa-miR-26a	hsa04010:MAPK signaling pathway	0.00402653
hsa-miR-150	hsa04010:MAPK signaling pathway	0.00565018
hsa-miR-142-3p	hsa04010:MAPK signaling pathway	0.0100954
hsa-miR-27a	hsa04010:MAPK signaling pathway	0.0106367
hsa-miR-602	hsa04010:MAPK signaling pathway	0.0211289
hsa-miR-494	hsa04010:MAPK signaling pathway	0.0245951
hsa-miR-634	hsa04010:MAPK signaling pathway	0.0340509
hsa-miR-129-5p	hsa04010:MAPK signaling pathway	0.0495648
hsa-miR-150	hsa04012:ErbB signaling pathway	0.00153953
hsa-miR-129-5p	hsa04012:ErbB signaling pathway	0.00783256
hsa-miR-634	hsa04012:ErbB signaling pathway	0.0136457
hsa-miR-27a	hsa04012:ErbB signaling pathway	0.0230513
hsa-miR-29b	hsa04012:ErbB signaling pathway	0.0273329
hsa-miR-129-5p	hsa04020:Calcium signaling pathway	0.0196526
hsa-miR-21	hsa04060:Cytokine-cytokine receptor interaction	0.000790113
hsa-miR-21	hsa04062:Chemokine signaling pathway	0.0139747
hsa-miR-197	hsa04062:Chemokine signaling pathway	0.0317356
hsa-miR-365	hsa04062:Chemokine signaling pathway	0.0490143
hsa-miR-365	hsa04070:Phosphatidylinositol signaling system	0.0111277
hsa-miR-26a	hsa04070:Phosphatidylinositol signaling system	0.0426912
hsa-miR-26a	hsa04110:Cell cycle	0.0064892
hsa-miR-634	hsa04114:Oocyte meiosis	0.00210816
hsa-miR-29a	hsa04115:p53 signaling pathway	0.01789
hsa-miR-29b	hsa04115:p53 signaling pathway	0.0182826
hsa-miR-26a	hsa04115:p53 signaling pathway	0.0275016
hsa-miR-26a	hsa04120:Ubiquitin mediated proteolysis	0.0141345
hsa-miR-23a	hsa04130:SNARE interactions in vesicular transport	0.0325233
hsa-miR-26a	hsa04140:Regulation of autophagy	0.0367306
hsa-miR-27a	hsa04144:Endocytosis	0.000741795
hsa-miR-634	hsa04144:Endocytosis	0.00102261
hsa-miR-494	hsa04144:Endocytosis	0.00389479
hsa-miR-23a	hsa04144:Endocytosis	0.00684465
hsa-miR-21	hsa04144:Endocytosis	0.012348
hsa-miR-142-3p	hsa04144:Endocytosis	0.0226161
hsa-miR-197	hsa04144:Endocytosis	0.028995
hsa-miR-634	hsa04150:mTOR signaling pathway	9.10364e-05
hsa-miR-150	hsa04150:mTOR signaling pathway	0.00319447
hsa-miR-27a	hsa04150:mTOR signaling pathway	0.0118113
hsa-miR-29a	hsa04150:mTOR signaling pathway	0.0131025
hsa-miR-29b	hsa04150:mTOR signaling pathway	0.0133719
hsa-miR-365	hsa04150:mTOR signaling pathway	0.0429662
hsa-miR-365	hsa04210:Apoptosis	0.023213
hsa-miR-21	hsa04270:Vascular smooth muscle contraction	0.0165421
hsa-miR-129-5p	hsa04270:Vascular smooth muscle contraction	0.016858
hsa-miR-197	hsa04270:Vascular smooth muscle contraction	0.0481459
hsa-miR-26a	hsa04310:Wnt signaling pathway	0.00266443
hsa-miR-129-5p	hsa04310:Wnt signaling pathway	0.0121475
hsa-miR-142-3p	hsa04310:Wnt signaling pathway	0.0175613
hsa-miR-494	hsa04310:Wnt signaling pathway	0.0185431
hsa-miR-150	hsa04310:Wnt signaling pathway	0.0276519
hsa-miR-365	hsa04320:Dorso-ventral axis formation	0.0249058
hsa-miR-21	hsa04350:TGF-beta signaling pathway	4.42051e-05
hsa-miR-27a	hsa04350:TGF-beta signaling pathway	0.000453575
hsa-miR-142-3p	hsa04350:TGF-beta signaling pathway	0.00764167
hsa-miR-150	hsa04350:TGF-beta signaling pathway	0.0167441
hsa-miR-129-5p	hsa04350:TGF-beta signaling pathway	0.0216752
hsa-miR-494	hsa04350:TGF-beta signaling pathway	0.0250297
hsa-miR-29a	hsa04350:TGF-beta signaling pathway	0.0267242
hsa-miR-29b	hsa04350:TGF-beta signaling pathway	0.0273329
hsa-miR-634	hsa04350:TGF-beta signaling pathway	0.0390317
hsa-miR-634	hsa04360:Axon guidance	0.0190589
hsa-miR-129-5p	hsa04360:Axon guidance	0.0190877
hsa-miR-494	hsa04360:Axon guidance	0.0200477
hsa-miR-197	hsa04360:Axon guidance	0.0320124
hsa-miR-129-3p	hsa04360:Axon guidance	0.0387153
hsa-miR-26a	hsa04360:Axon guidance	0.0421122
hsa-miR-29b	hsa04510:Focal adhesion	1.50428e-06
hsa-miR-29a	hsa04510:Focal adhesion	4.53049e-06
hsa-miR-634	hsa04510:Focal adhesion	0.00097514
hsa-miR-26a	hsa04510:Focal adhesion	0.00498247
hsa-miR-23a	hsa04510:Focal adhesion	0.0178099
hsa-miR-27a	hsa04510:Focal adhesion	0.0196361
hsa-miR-142-3p	hsa04510:Focal adhesion	0.0384264
hsa-miR-29a	hsa04512:ECM-receptor interaction	2.39768e-06
hsa-miR-29b	hsa04512:ECM-receptor interaction	2.52688e-06
hsa-miR-634	hsa04520:Adherens junction	0.0018153
hsa-miR-197	hsa04520:Adherens junction	0.00923328
hsa-miR-23a	hsa04530:Tight junction	0.00508291
hsa-miR-23a	hsa04621:NOD-like receptor signaling pathway	0.0165897
hsa-miR-21	hsa04630:Jak-STAT signaling pathway	0.0456876
hsa-miR-634	hsa04666:Fc gamma R-mediated phagocytosis	0.00228041
hsa-miR-27a	hsa04666:Fc gamma R-mediated phagocytosis	0.00840006
hsa-miR-129-5p	hsa04666:Fc gamma R-mediated phagocytosis	0.035845
hsa-miR-142-3p	hsa04666:Fc gamma R-mediated phagocytosis	0.0384918
hsa-miR-494	hsa04710:Circadian rhythm	0.00796022
hsa-miR-634	hsa04720:Long-term potentiation	0.000154372
hsa-miR-26a	hsa04720:Long-term potentiation	0.000212209
hsa-miR-129-5p	hsa04720:Long-term potentiation	0.00454385
hsa-miR-197	hsa04720:Long-term potentiation	0.0215139
hsa-miR-21	hsa04720:Long-term potentiation	0.0315256
hsa-miR-634	hsa04722:Neurotrophin signaling pathway	0.000149188
hsa-miR-365	hsa04722:Neurotrophin signaling pathway	0.00116143
hsa-miR-27a	hsa04722:Neurotrophin signaling pathway	0.00353205
hsa-miR-21	hsa04810:Regulation of actin cytoskeleton	0.000491741
hsa-miR-27a	hsa04810:Regulation of actin cytoskeleton	0.000806226
hsa-miR-142-3p	hsa04810:Regulation of actin cytoskeleton	0.00407672
hsa-miR-634	hsa04810:Regulation of actin cytoskeleton	0.00502985
hsa-miR-129-5p	hsa04810:Regulation of actin cytoskeleton	0.0132816
hsa-miR-365	hsa04810:Regulation of actin cytoskeleton	0.0209294
hsa-miR-23a	hsa04810:Regulation of actin cytoskeleton	0.0345742
hsa-miR-27a	hsa04910:Insulin signaling pathway	0.00167497
hsa-miR-634	hsa04910:Insulin signaling pathway	0.00362564
hsa-miR-150	hsa04910:Insulin signaling pathway	0.0130064
hsa-miR-29b	hsa04910:Insulin signaling pathway	0.0156654
hsa-miR-29a	hsa04910:Insulin signaling pathway	0.0336109
hsa-miR-27a	hsa04912:GnRH signaling pathway	0.0247623
hsa-miR-634	hsa04912:GnRH signaling pathway	0.0262081
hsa-miR-129-5p	hsa04912:GnRH signaling pathway	0.0425038
hsa-miR-634	hsa04914:Progesterone-mediated oocyte maturation	0.00106217
hsa-miR-634	hsa04916:Melanogenesis	5.39443e-05
hsa-miR-150	hsa04920:Adipocytokine signaling pathway	0.0405624
hsa-miR-634	hsa04960:Aldosterone-regulated sodium reabsorption	0.0159736
hsa-miR-365	hsa04960:Aldosterone-regulated sodium reabsorption	0.0198916
hsa-miR-27a	hsa04960:Aldosterone-regulated sodium reabsorption	0.0269764
hsa-miR-129-5p	hsa04960:Aldosterone-regulated sodium reabsorption	0.043396
hsa-miR-634	hsa05200:Pathways in cancer	0.000125838
hsa-miR-150	hsa05200:Pathways in cancer	0.00285241
hsa-miR-197	hsa05200:Pathways in cancer	0.00409086
hsa-miR-26a	hsa05200:Pathways in cancer	0.00456443
hsa-miR-29a	hsa05200:Pathways in cancer	0.0102407
hsa-miR-142-3p	hsa05200:Pathways in cancer	0.0117784
hsa-miR-365	hsa05200:Pathways in cancer	0.0193585
hsa-miR-129-5p	hsa05200:Pathways in cancer	0.0215947
hsa-miR-494	hsa05200:Pathways in cancer	0.021858
hsa-miR-29b	hsa05200:Pathways in cancer	0.0333692
hsa-miR-27a	hsa05200:Pathways in cancer	0.0341463
hsa-miR-365	hsa05210:Colorectal cancer	0.0012544
hsa-miR-150	hsa05210:Colorectal cancer	0.00425304
hsa-miR-634	hsa05210:Colorectal cancer	0.0111673
hsa-miR-197	hsa05210:Colorectal cancer	0.0138607
hsa-miR-27a	hsa05210:Colorectal cancer	0.0178686
hsa-miR-142-3p	hsa05210:Colorectal cancer	0.0227104
hsa-miR-21	hsa05210:Colorectal cancer	0.0276275
hsa-miR-634	hsa05211:Renal cell carcinoma	0.000911951
hsa-miR-27a	hsa05211:Renal cell carcinoma	0.0116706
hsa-miR-365	hsa05211:Renal cell carcinoma	0.0325639
hsa-miR-150	hsa05212:Pancreatic cancer	0.00555106
hsa-miR-197	hsa05212:Pancreatic cancer	0.00669161
hsa-miR-365	hsa05212:Pancreatic cancer	0.00978075
hsa-miR-27a	hsa05212:Pancreatic cancer	0.0143063
hsa-miR-634	hsa05212:Pancreatic cancer	0.0469694
hsa-miR-634	hsa05213:Endometrial cancer	0.0111031
hsa-miR-150	hsa05213:Endometrial cancer	0.0131651
hsa-miR-29a	hsa05214:Glioma	0.00343281
hsa-miR-29b	hsa05214:Glioma	0.00352542
hsa-miR-365	hsa05214:Glioma	0.00512458
hsa-miR-634	hsa05214:Glioma	0.00765748
hsa-miR-150	hsa05214:Glioma	0.0312393
hsa-miR-27a	hsa05214:Glioma	0.0376122
hsa-miR-26a	hsa05214:Glioma	0.0495869
hsa-miR-150	hsa05215:Prostate cancer	0.00183224
hsa-miR-29a	hsa05215:Prostate cancer	0.0116873
hsa-miR-634	hsa05215:Prostate cancer	0.0155075
hsa-miR-197	hsa05215:Prostate cancer	0.0180258
hsa-miR-26a	hsa05215:Prostate cancer	0.0196114
hsa-miR-365	hsa05215:Prostate cancer	0.025639
hsa-miR-27a	hsa05215:Prostate cancer	0.0270741
hsa-miR-29b	hsa05215:Prostate cancer	0.0311131
hsa-miR-27a	hsa05216:Thyroid cancer	0.00397815
hsa-miR-29a	hsa05218:Melanoma	0.00766643
hsa-miR-365	hsa05218:Melanoma	0.00915289
hsa-miR-29b	hsa05218:Melanoma	0.023185
hsa-miR-26a	hsa05218:Melanoma	0.0345314
hsa-miR-634	hsa05219:Bladder cancer	0.00386649
hsa-miR-150	hsa05220:Chronic myeloid leukemia	0.000473601
hsa-miR-365	hsa05220:Chronic myeloid leukemia	0.00284117
hsa-miR-634	hsa05220:Chronic myeloid leukemia	0.0190584
hsa-miR-129-5p	hsa05220:Chronic myeloid leukemia	0.0251502
hsa-miR-197	hsa05220:Chronic myeloid leukemia	0.0313056
hsa-miR-129-5p	hsa05221:Acute myeloid leukemia	0.00569873
hsa-miR-29a	hsa05222:Small cell lung cancer	2.39768e-06
hsa-miR-29b	hsa05222:Small cell lung cancer	2.52688e-06
hsa-miR-23a	hsa05222:Small cell lung cancer	0.0417418
hsa-miR-365	hsa05223:Non-small cell lung cancer	0.0117374
hsa-miR-197	hsa05223:Non-small cell lung cancer	0.0377197
hsa-miR-27a	hsa05223:Non-small cell lung cancer	0.0402735
hsa-miR-634	hsa05223:Non-small cell lung cancer	0.0462007
hsa-miR-29a	hsa05223:Non-small cell lung cancer	0.0484648
hsa-miR-129-5p	hsa05410:Hypertrophic cardiomyopathy (HCM)	0.00665615
hsa-miR-129-5p	hsa05412:Arrhythmogenic right ventricular cardiomyopathy (ARVC)	0.00944842
hsa-miR-26a	hsa05412:Arrhythmogenic right ventricular cardiomyopathy (ARVC)	0.048787
hsa-miR-142-3p	hsa05412:Arrhythmogenic right ventricular cardiomyopathy (ARVC)	0.0491493
hsa-miR-129-5p	hsa05414:Dilated cardiomyopathy	0.0114762
hsa-miR-142-3p	hsa05414:Dilated cardiomyopathy	0.033642
Significant pathways enriched by predicted genes of downregulated miRNAs(define as P4)
miRANs	Term	PValue
hsa-miR-107	hsa00471:D-Glutamine and D-glutamate metabolism	0.0195978
hsa-miR-16	hsa00471:D-Glutamine and D-glutamate metabolism	0.0343981
hsa-miR-15b	hsa00471:D-Glutamine and D-glutamate metabolism	0.0368311
hsa-miR-15a	hsa00471:D-Glutamine and D-glutamate metabolism	0.0384932
hsa-let-7a	hsa00534:Heparan sulfate biosynthesis	0.0286342
hsa-miR-486-5p	hsa00563:Glycosylphosphatidylinositol(GPI)-anchor biosynthesis	0.00744392
hsa-let-7b	hsa00970:Aminoacyl-tRNA biosynthesis	0.0389945
hsa-miR-16	hsa01040:Biosynthesis of unsaturated fatty acids	0.0270313
hsa-miR-139-5p	hsa03018:RNA degradation	0.048029
hsa-let-7c	hsa04010:MAPK signaling pathway	6.05621e-05
hsa-let-7i	hsa04010:MAPK signaling pathway	0.00018076
hsa-miR-20b	hsa04010:MAPK signaling pathway	0.000197151
hsa-let-7b	hsa04010:MAPK signaling pathway	0.000207503
hsa-miR-93	hsa04010:MAPK signaling pathway	0.000787911
hsa-let-7g	hsa04010:MAPK signaling pathway	0.000878481
hsa-let-7d	hsa04010:MAPK signaling pathway	0.00147559
hsa-miR-20a	hsa04010:MAPK signaling pathway	0.00162366
hsa-miR-15b	hsa04010:MAPK signaling pathway	0.00214997
hsa-miR-16	hsa04010:MAPK signaling pathway	0.00216108
hsa-let-7a	hsa04010:MAPK signaling pathway	0.00219564
hsa-let-7f	hsa04010:MAPK signaling pathway	0.00361506
hsa-miR-15a	hsa04010:MAPK signaling pathway	0.00991734
hsa-miR-144	hsa04010:MAPK signaling pathway	0.0216311
hsa-miR-15b	hsa04012:ErbB signaling pathway	0.011585
hsa-miR-16	hsa04012:ErbB signaling pathway	0.0199481
hsa-miR-20a	hsa04012:ErbB signaling pathway	0.0235269
hsa-miR-15a	hsa04012:ErbB signaling pathway	0.0308309
hsa-miR-93	hsa04012:ErbB signaling pathway	0.0373845
hsa-miR-20b	hsa04012:ErbB signaling pathway	0.0373845
hsa-miR-20a	hsa04020:Calcium signaling pathway	0.0267071
hsa-let-7c	hsa04020:Calcium signaling pathway	0.0282628
hsa-let-7i	hsa04062:Chemokine signaling pathway	0.0467087
hsa-miR-15b	hsa04070:Phosphatidylinositol signaling system	0.0401527
hsa-miR-20a	hsa04110:Cell cycle	0.0165372
hsa-miR-93	hsa04110:Cell cycle	0.0428087
hsa-miR-16	hsa04114:Oocyte meiosis	0.0134054
hsa-miR-139-5p	hsa04114:Oocyte meiosis	0.014347
hsa-miR-15a	hsa04114:Oocyte meiosis	0.0224638
hsa-miR-93	hsa04114:Oocyte meiosis	0.0282057
hsa-miR-107	hsa04114:Oocyte meiosis	0.0296277
hsa-miR-15b	hsa04114:Oocyte meiosis	0.0369774
hsa-miR-185	hsa04114:Oocyte meiosis	0.0421268
hsa-miR-107	hsa04115:p53 signaling pathway	0.0185423
hsa-let-7g	hsa04115:p53 signaling pathway	0.0328335
hsa-let-7i	hsa04115:p53 signaling pathway	0.0348838
hsa-miR-107	hsa04120:Ubiquitin mediated proteolysis	0.00293148
hsa-miR-15a	hsa04120:Ubiquitin mediated proteolysis	0.0110749
hsa-miR-25	hsa04120:Ubiquitin mediated proteolysis	0.0449286
hsa-miR-16	hsa04120:Ubiquitin mediated proteolysis	0.0449411
hsa-miR-20a	hsa04142:Lysosome	0.0172463
hsa-let-7a	hsa04142:Lysosome	0.0399783
hsa-miR-93	hsa04142:Lysosome	0.0464175
hsa-miR-15b	hsa04144:Endocytosis	0.000216262
hsa-miR-93	hsa04144:Endocytosis	0.000521882
hsa-miR-20b	hsa04144:Endocytosis	0.000521882
hsa-miR-16	hsa04144:Endocytosis	0.00134792
hsa-miR-15a	hsa04144:Endocytosis	0.0015564
hsa-miR-20a	hsa04144:Endocytosis	0.00202235
hsa-let-7c	hsa04144:Endocytosis	0.0391825
hsa-let-7a	hsa04144:Endocytosis	0.0404114
hsa-let-7b	hsa04144:Endocytosis	0.0442631
hsa-miR-15b	hsa04150:mTOR signaling pathway	5.55194e-05
hsa-miR-15a	hsa04150:mTOR signaling pathway	0.000292498
hsa-miR-16	hsa04150:mTOR signaling pathway	0.00225612
hsa-miR-107	hsa04150:mTOR signaling pathway	0.00318496
hsa-miR-93	hsa04150:mTOR signaling pathway	0.0130069
hsa-miR-20b	hsa04150:mTOR signaling pathway	0.0130069
hsa-miR-20b	hsa04210:Apoptosis	0.00115494
hsa-miR-93	hsa04210:Apoptosis	0.00760985
hsa-miR-20a	hsa04210:Apoptosis	0.0483154
hsa-miR-185	hsa04260:Cardiac muscle contraction	0.0456631
hsa-miR-144	hsa04270:Vascular smooth muscle contraction	0.000772149
hsa-miR-16	hsa04310:Wnt signaling pathway	1.77296e-05
hsa-miR-15b	hsa04310:Wnt signaling pathway	3.46425e-05
hsa-miR-15a	hsa04310:Wnt signaling pathway	5.29872e-05
hsa-miR-144	hsa04310:Wnt signaling pathway	0.00449226
hsa-miR-20a	hsa04310:Wnt signaling pathway	0.00865472
hsa-miR-93	hsa04310:Wnt signaling pathway	0.0209857
hsa-miR-107	hsa04310:Wnt signaling pathway	0.0342738
hsa-miR-20b	hsa04310:Wnt signaling pathway	0.0379495
hsa-miR-139-5p	hsa04310:Wnt signaling pathway	0.0380586
hsa-miR-144	hsa04320:Dorso-ventral axis formation	0.0283063
hsa-miR-107	hsa04340:Hedgehog signaling pathway	0.016847
hsa-miR-20a	hsa04350:TGF-beta signaling pathway	7.00241e-05
hsa-miR-20b	hsa04350:TGF-beta signaling pathway	0.00040529
hsa-miR-144	hsa04350:TGF-beta signaling pathway	0.00100115
hsa-miR-93	hsa04350:TGF-beta signaling pathway	0.00115494
hsa-let-7g	hsa04350:TGF-beta signaling pathway	0.0160693
hsa-let-7c	hsa04350:TGF-beta signaling pathway	0.0164904
hsa-let-7a	hsa04350:TGF-beta signaling pathway	0.0169195
hsa-let-7i	hsa04350:TGF-beta signaling pathway	0.0173569
hsa-let-7b	hsa04350:TGF-beta signaling pathway	0.0182564
hsa-miR-139-5p	hsa04350:TGF-beta signaling pathway	0.0318217
hsa-let-7f	hsa04350:TGF-beta signaling pathway	0.0392845
hsa-miR-16	hsa04350:TGF-beta signaling pathway	0.0429859
hsa-miR-93	hsa04360:Axon guidance	9.88266e-05
hsa-miR-20b	hsa04360:Axon guidance	9.88266e-05
hsa-miR-20a	hsa04360:Axon guidance	0.000180723
hsa-miR-144	hsa04360:Axon guidance	0.00892899
hsa-let-7f	hsa04360:Axon guidance	0.0119947
hsa-let-7g	hsa04360:Axon guidance	0.0132172
hsa-let-7c	hsa04360:Axon guidance	0.0136453
hsa-miR-16	hsa04360:Axon guidance	0.0136468
hsa-let-7a	hsa04360:Axon guidance	0.014084
hsa-let-7i	hsa04360:Axon guidance	0.0145334
hsa-let-7b	hsa04360:Axon guidance	0.0154651
hsa-miR-15b	hsa04360:Axon guidance	0.0191712
hsa-miR-324-3p	hsa04360:Axon guidance	0.0217719
hsa-miR-15a	hsa04360:Axon guidance	0.0237295
hsa-miR-139-5p	hsa04360:Axon guidance	0.0360957
hsa-miR-15b	hsa04370:VEGF signaling pathway	0.00797787
hsa-miR-16	hsa04370:VEGF signaling pathway	0.015015
hsa-miR-15a	hsa04370:VEGF signaling pathway	0.0230231
hsa-miR-15b	hsa04510:Focal adhesion	3.79647e-05
hsa-miR-16	hsa04510:Focal adhesion	4.42276e-05
hsa-miR-15a	hsa04510:Focal adhesion	0.000143578
hsa-miR-107	hsa04510:Focal adhesion	0.00075586
hsa-miR-144	hsa04510:Focal adhesion	0.000820087
hsa-miR-486-5p	hsa04510:Focal adhesion	0.00145511
hsa-miR-20a	hsa04510:Focal adhesion	0.00397424
hsa-let-7g	hsa04510:Focal adhesion	0.00895349
hsa-let-7i	hsa04510:Focal adhesion	0.0100877
hsa-miR-139-5p	hsa04510:Focal adhesion	0.0102709
hsa-miR-25	hsa04510:Focal adhesion	0.0133572
hsa-let-7c	hsa04510:Focal adhesion	0.0196127
hsa-miR-93	hsa04510:Focal adhesion	0.0259013
hsa-miR-20b	hsa04510:Focal adhesion	0.0259013
hsa-let-7f	hsa04510:Focal adhesion	0.0339524
hsa-miR-363	hsa04510:Focal adhesion	0.0381753
hsa-miR-92a	hsa04510:Focal adhesion	0.039519
hsa-let-7a	hsa04510:Focal adhesion	0.0400168
hsa-miR-185	hsa04510:Focal adhesion	0.0441231
hsa-miR-25	hsa04512:ECM-receptor interaction	0.00573076
hsa-let-7g	hsa04512:ECM-receptor interaction	0.0129591
hsa-miR-92a	hsa04512:ECM-receptor interaction	0.0133574
hsa-miR-144	hsa04512:ECM-receptor interaction	0.0334482
hsa-let-7c	hsa04512:ECM-receptor interaction	0.0358635
hsa-miR-324-3p	hsa04514:Cell adhesion molecules (CAMs)	0.0251055
hsa-miR-16	hsa04520:Adherens junction	0.000302891
hsa-miR-15b	hsa04520:Adherens junction	0.0013788
hsa-miR-15a	hsa04520:Adherens junction	0.00476163
hsa-let-7b	hsa04520:Adherens junction	0.00854655
hsa-let-7d	hsa04520:Adherens junction	0.00963235
hsa-miR-20a	hsa04520:Adherens junction	0.0197828
hsa-let-7f	hsa04520:Adherens junction	0.0206233
hsa-let-7g	hsa04520:Adherens junction	0.0221287
hsa-let-7c	hsa04520:Adherens junction	0.0226475
hsa-let-7a	hsa04520:Adherens junction	0.0231749
hsa-let-7i	hsa04520:Adherens junction	0.023711
hsa-miR-324-3p	hsa04520:Adherens junction	0.0241015
hsa-miR-107	hsa04520:Adherens junction	0.0381622
hsa-miR-139-5p	hsa04530:Tight junction	0.0443524
hsa-miR-15b	hsa04540:Gap junction	0.0140443
hsa-miR-144	hsa04540:Gap junction	0.0481053
hsa-miR-16	hsa04540:Gap junction	0.0498619
hsa-miR-16	hsa04660:T cell receptor signaling pathway	0.000289271
hsa-miR-15b	hsa04660:T cell receptor signaling pathway	0.00123061
hsa-miR-15a	hsa04660:T cell receptor signaling pathway	0.00393588
hsa-miR-16	hsa04662:B cell receptor signaling pathway	0.00213985
hsa-miR-15b	hsa04662:B cell receptor signaling pathway	0.00797787
hsa-miR-15a	hsa04662:B cell receptor signaling pathway	0.0230231
hsa-miR-16	hsa04664:Fc epsilon RI signaling pathway	0.0447671
hsa-miR-107	hsa04666:Fc gamma R-mediated phagocytosis	0.010177
hsa-miR-15b	hsa04666:Fc gamma R-mediated phagocytosis	0.0108511
hsa-miR-16	hsa04666:Fc gamma R-mediated phagocytosis	0.0179943
hsa-miR-107	hsa04710:Circadian rhythm	0.00575198
hsa-miR-144	hsa04720:Long-term potentiation	0.00079474
hsa-miR-363	hsa04720:Long-term potentiation	0.013199
hsa-miR-139-5p	hsa04720:Long-term potentiation	0.0307851
hsa-miR-107	hsa04720:Long-term potentiation	0.0475577
hsa-miR-15b	hsa04722:Neurotrophin signaling pathway	4.66214e-08
hsa-miR-16	hsa04722:Neurotrophin signaling pathway	2.9215e-07
hsa-miR-15a	hsa04722:Neurotrophin signaling pathway	1.00137e-06
hsa-miR-93	hsa04722:Neurotrophin signaling pathway	0.00492163
hsa-miR-20b	hsa04722:Neurotrophin signaling pathway	0.00492163
hsa-miR-20a	hsa04722:Neurotrophin signaling pathway	0.0152623
hsa-miR-107	hsa04722:Neurotrophin signaling pathway	0.0322086
hsa-miR-144	hsa04730:Long-term depression	0.0222197
hsa-miR-20b	hsa04810:Regulation of actin cytoskeleton	8.31003e-05
hsa-miR-107	hsa04810:Regulation of actin cytoskeleton	0.000153229
hsa-miR-20a	hsa04810:Regulation of actin cytoskeleton	0.000179816
hsa-miR-93	hsa04810:Regulation of actin cytoskeleton	0.000403024
hsa-miR-16	hsa04810:Regulation of actin cytoskeleton	0.00168775
hsa-miR-25	hsa04810:Regulation of actin cytoskeleton	0.00202071
hsa-miR-363	hsa04810:Regulation of actin cytoskeleton	0.00271176
hsa-miR-15b	hsa04810:Regulation of actin cytoskeleton	0.0029502
hsa-miR-144	hsa04810:Regulation of actin cytoskeleton	0.00457516
hsa-miR-15a	hsa04810:Regulation of actin cytoskeleton	0.00779727
hsa-miR-92a	hsa04810:Regulation of actin cytoskeleton	0.0152007
hsa-miR-185	hsa04810:Regulation of actin cytoskeleton	0.0189014
hsa-miR-486-5p	hsa04810:Regulation of actin cytoskeleton	0.0231878
hsa-miR-15b	hsa04910:Insulin signaling pathway	1.17843e-06
hsa-miR-15a	hsa04910:Insulin signaling pathway	5.95203e-06
hsa-miR-16	hsa04910:Insulin signaling pathway	1.77525e-05
hsa-miR-107	hsa04910:Insulin signaling pathway	0.00035301
hsa-miR-15b	hsa04912:GnRH signaling pathway	0.0142893
hsa-miR-16	hsa04912:GnRH signaling pathway	0.0230845
hsa-miR-15a	hsa04912:GnRH signaling pathway	0.0361148
hsa-miR-15a	hsa04914:Progesterone-mediated oocyte maturation	0.00530768
hsa-miR-16	hsa04914:Progesterone-mediated oocyte maturation	0.0077152
hsa-miR-15b	hsa04914:Progesterone-mediated oocyte maturation	0.0238892
hsa-miR-139-5p	hsa04914:Progesterone-mediated oocyte maturation	0.0301179
hsa-miR-15b	hsa04916:Melanogenesis	0.0328143
hsa-miR-15b	hsa04930:Type II diabetes mellitus	0.00439707
hsa-miR-16	hsa04930:Type II diabetes mellitus	0.0108979
hsa-miR-15a	hsa04930:Type II diabetes mellitus	0.0421656
hsa-miR-15b	hsa04960:Aldosterone-regulated sodium reabsorption	0.0175557
hsa-miR-16	hsa04960:Aldosterone-regulated sodium reabsorption	0.0417954
hsa-miR-139-5p	hsa05014:Amyotrophic lateral sclerosis (ALS)	0.0099073
hsa-miR-144	hsa05110:Vibrio cholerae infection	0.0417701
hsa-miR-16	hsa05200:Pathways in cancer	1.87411e-08
hsa-miR-15b	hsa05200:Pathways in cancer	1.73064e-07
hsa-miR-15a	hsa05200:Pathways in cancer	2.09885e-06
hsa-miR-20a	hsa05200:Pathways in cancer	1.47049e-05
hsa-miR-93	hsa05200:Pathways in cancer	2.23212e-05
hsa-miR-20b	hsa05200:Pathways in cancer	2.23212e-05
hsa-miR-107	hsa05200:Pathways in cancer	0.00020679
hsa-miR-144	hsa05200:Pathways in cancer	0.00143368
hsa-miR-486-5p	hsa05200:Pathways in cancer	0.00645204
hsa-let-7i	hsa05200:Pathways in cancer	0.0142576
hsa-miR-139-5p	hsa05200:Pathways in cancer	0.019794
hsa-let-7g	hsa05200:Pathways in cancer	0.0390628
hsa-miR-15b	hsa05210:Colorectal cancer	0.000423413
hsa-miR-16	hsa05210:Colorectal cancer	0.000840265
hsa-miR-15a	hsa05210:Colorectal cancer	0.00158927
hsa-miR-144	hsa05210:Colorectal cancer	0.00565457
hsa-miR-93	hsa05210:Colorectal cancer	0.0130704
hsa-miR-20b	hsa05210:Colorectal cancer	0.0130704
hsa-miR-20a	hsa05210:Colorectal cancer	0.0177167
hsa-miR-139-5p	hsa05210:Colorectal cancer	0.0268976
hsa-let-7c	hsa05210:Colorectal cancer	0.0358635
hsa-miR-15b	hsa05211:Renal cell carcinoma	3.87817e-05
hsa-miR-16	hsa05211:Renal cell carcinoma	9.26443e-05
hsa-miR-15a	hsa05211:Renal cell carcinoma	0.000187397
hsa-miR-20a	hsa05211:Renal cell carcinoma	0.00347999
hsa-miR-93	hsa05211:Renal cell carcinoma	0.00671362
hsa-miR-20b	hsa05211:Renal cell carcinoma	0.00671362
hsa-miR-107	hsa05211:Renal cell carcinoma	0.0220651
hsa-miR-139-5p	hsa05211:Renal cell carcinoma	0.0348446
hsa-miR-16	hsa05212:Pancreatic cancer	3.59331e-05
hsa-miR-15b	hsa05212:Pancreatic cancer	5.71235e-05
hsa-miR-15a	hsa05212:Pancreatic cancer	0.000265305
hsa-miR-93	hsa05212:Pancreatic cancer	0.00112655
hsa-miR-20b	hsa05212:Pancreatic cancer	0.00323216
hsa-miR-20a	hsa05212:Pancreatic cancer	0.0270002
hsa-miR-15b	hsa05213:Endometrial cancer	0.00300384
hsa-miR-15a	hsa05213:Endometrial cancer	0.0108366
hsa-miR-16	hsa05213:Endometrial cancer	0.020658
hsa-miR-15b	hsa05214:Glioma	0.00164467
hsa-miR-93	hsa05214:Glioma	0.00259802
hsa-miR-20b	hsa05214:Glioma	0.00259802
hsa-miR-20a	hsa05214:Glioma	0.00361498
hsa-miR-16	hsa05214:Glioma	0.00366654
hsa-miR-15a	hsa05214:Glioma	0.00593477
hsa-miR-15b	hsa05215:Prostate cancer	2.77948e-05
hsa-miR-16	hsa05215:Prostate cancer	5.67316e-05
hsa-miR-20b	hsa05215:Prostate cancer	5.78825e-05
hsa-miR-15a	hsa05215:Prostate cancer	0.000127218
hsa-miR-93	hsa05215:Prostate cancer	0.000182918
hsa-miR-20a	hsa05215:Prostate cancer	0.00225902
hsa-miR-486-5p	hsa05215:Prostate cancer	0.0146047
hsa-miR-363	hsa05215:Prostate cancer	0.0488256
hsa-miR-16	hsa05216:Thyroid cancer	0.0247608
hsa-miR-107	hsa05217:Basal cell carcinoma	0.0431824
hsa-miR-20b	hsa05218:Melanoma	0.000306258
hsa-miR-93	hsa05218:Melanoma	0.000967446
hsa-miR-20a	hsa05218:Melanoma	0.00142206
hsa-miR-486-5p	hsa05218:Melanoma	0.00575108
hsa-miR-16	hsa05218:Melanoma	0.00983112
hsa-miR-15b	hsa05218:Melanoma	0.0129101
hsa-miR-107	hsa05218:Melanoma	0.0239961
hsa-miR-15a	hsa05218:Melanoma	0.0356484
hsa-let-7f	hsa05218:Melanoma	0.037879
hsa-let-7g	hsa05218:Melanoma	0.0402349
hsa-let-7a	hsa05218:Melanoma	0.0418582
hsa-let-7i	hsa05218:Melanoma	0.0426857
hsa-let-7b	hsa05218:Melanoma	0.0443729
hsa-miR-93	hsa05219:Bladder cancer	0.00265896
hsa-miR-20b	hsa05219:Bladder cancer	0.00265896
hsa-miR-20a	hsa05219:Bladder cancer	0.00350578
hsa-let-7c	hsa05219:Bladder cancer	0.010946
hsa-let-7f	hsa05219:Bladder cancer	0.0375927
hsa-let-7g	hsa05219:Bladder cancer	0.0394471
hsa-let-7a	hsa05219:Bladder cancer	0.0407145
hsa-let-7i	hsa05219:Bladder cancer	0.0413575
hsa-let-7b	hsa05219:Bladder cancer	0.0426622
hsa-miR-16	hsa05220:Chronic myeloid leukemia	0.000713526
hsa-miR-15b	hsa05220:Chronic myeloid leukemia	0.00103949
hsa-let-7i	hsa05220:Chronic myeloid leukemia	0.00202064
hsa-miR-15a	hsa05220:Chronic myeloid leukemia	0.00371733
hsa-miR-93	hsa05220:Chronic myeloid leukemia	0.00476045
hsa-miR-20b	hsa05220:Chronic myeloid leukemia	0.00476045
hsa-let-7b	hsa05220:Chronic myeloid leukemia	0.00720655
hsa-let-7f	hsa05220:Chronic myeloid leukemia	0.0178356
hsa-let-7g	hsa05220:Chronic myeloid leukemia	0.0191566
hsa-let-7c	hsa05220:Chronic myeloid leukemia	0.0196123
hsa-let-7a	hsa05220:Chronic myeloid leukemia	0.0200756
hsa-miR-20a	hsa05220:Chronic myeloid leukemia	0.0359004
hsa-miR-16	hsa05221:Acute myeloid leukemia	7.32958e-06
hsa-miR-15b	hsa05221:Acute myeloid leukemia	1.1667e-05
hsa-miR-15a	hsa05221:Acute myeloid leukemia	6.62811e-05
hsa-miR-93	hsa05221:Acute myeloid leukemia	0.0268531
hsa-miR-93	hsa05222:Small cell lung cancer	0.00211437
hsa-miR-20b	hsa05222:Small cell lung cancer	0.00211437
hsa-miR-144	hsa05222:Small cell lung cancer	0.00565457
hsa-miR-15b	hsa05222:Small cell lung cancer	0.00854056
hsa-miR-16	hsa05222:Small cell lung cancer	0.0151688
hsa-miR-20a	hsa05222:Small cell lung cancer	0.0177167
hsa-miR-15a	hsa05222:Small cell lung cancer	0.0237591
hsa-miR-363	hsa05222:Small cell lung cancer	0.0374632
hsa-miR-25	hsa05222:Small cell lung cancer	0.0483112
hsa-miR-15b	hsa05223:Non-small cell lung cancer	0.000346821
hsa-miR-15a	hsa05223:Non-small cell lung cancer	0.00153584
hsa-miR-16	hsa05223:Non-small cell lung cancer	0.00309191
hsa-miR-93	hsa05223:Non-small cell lung cancer	0.0168246
hsa-miR-20a	hsa05223:Non-small cell lung cancer	0.0213845
hsa-miR-20b	hsa05223:Non-small cell lung cancer	0.0421915
hsa-miR-185	hsa05410:Hypertrophic cardiomyopathy (HCM)	0.00920589
hsa-miR-185	hsa05412:Arrhythmogenic right ventricular cardiomyopathy (ARVC)	0.000303048
hsa-miR-139-5p	hsa05412:Arrhythmogenic right ventricular cardiomyopathy (ARVC)	0.0490352
hsa-miR-185	hsa05414:Dilated cardiomyopathy	0.00512288
hsa-miR-139-5p	hsa05414:Dilated cardiomyopathy	0.0413103
