# Supplementary material for: Detecting Key Genes Regulated by miRNAs in Dysfunctional Crosstalk Pathway of Myasthenia Gravis
Source: Biomed Res Int. 2015 Feb 1;2015:724715. doi: 10.1155/2015/724715 (PMC4331476; doi:10.1155/2015/724715)
Supplement: Supplementary file 1 — Table S1: MiRNAs and mRNAs differentially expressed in MG Table S1 lists the miRNAs and mRNAs differentially expressed in MG. A total of 46 differentially expressed miRNAs were identified, including 21 upregulated miRNAs and 25 downregulated miRNAs. A total of 1135 differentially expressed mRNAs were obtained, including 551 upregulated mRNAs and 584 downregulated mRNAs. Table S2: The predicted targets of differentially expressed miRNAs Table S2 lists the predicted targets of differentially expressed miRNAs. A total of 46 differentially expressed miRNAs, 9567 predicted targets, 34963 miRNA-target regulations were obtained. Table S3: Pathways enriched in differentially expressed mRNAs and predicted target genes of differentially expressed miRNAs Table S3 presents significant pathways enriched by differentially expressed mRNAs and predicted genes of differentially expressed miRNAs. The up- and down-regulated mRNAs were significantly enriched in 13 pathways (define as P1) and 8 pathways (define as P2), respectively. The predicted targets of up- and down-regulated miRNAs were significantly enriched in 64 pathways (define as P3) and 68 pathways (define as P4), respectively. [file 724715.f1.zip › Optional Supplementary Materials/Table S6.xlsx]

## Sheet: Sheet1
Table S6 Enriched GO terms of key genes and their functional categories
Pathway	GOId	GO annotation	GOName	description	pvalue	FDR	annoGenesID	categories
hsa04510:Focal adhesion	GO:0000186	bp	activation of MAPKK activity	The initiation of the activity of the inactive enzyme MAP kinase kinase by phosphorylation by a MAPKKK.	0.000133219	0.0126558	5594 ,5894	biological regulation
hsa04510:Focal adhesion	GO:0008284	bp	positive regulation of cell proliferation	Any process that activates or increases the rate or extent of cell proliferation.	2.56331e-05	0.00730542	3915 ,5156 ,5228 ,5594	biological regulation
hsa04510:Focal adhesion	GO:0030335	bp	positive regulation of cell migration	Any process that activates or increases the frequency, rate or extent of cell migration.	0.00202274	0.0452022	5156 ,5594	biological regulation
hsa04720:Long-term potentiation	GO:0000186	bp	activation of MAPKK activity	The initiation of the activity of the inactive enzyme MAP kinase kinase by phosphorylation by a MAPKKK.	0.000133219	0.0140783	5594 ,5894	biological regulation
hsa04720:Long-term potentiation	GO:0045727	bp	positive regulation of translation	Any process that activates or increases the frequency, rate or extent of the chemical reactions and pathways resulting in the formation of proteins by the translation of mRNA.	0.000139389	0.0140783	2033 ,5594	biological regulation
hsa04720:Long-term potentiation	GO:0060298	bp	positive regulation of sarcomere organization	Any process that increases the rate, frequency or extent myofibril assembly by organization of muscle actomyosin into sarcomeres. The sarcomere is the repeating unit of a myofibril in a muscle cell, composed of an array of overlapping thick and thin filaments between two adjacent Z discs.	0.00164977	0.0384523	2033	biological regulation
hsa04720:Long-term potentiation	GO:0060177	bp	regulation of angiotensin metabolic process	Any process that modulates the frequency, rate or extent of the chemical reactions and pathways involving angiotensin.	0.0024738	0.0425749	2033	biological regulation
hsa04720:Long-term potentiation	GO:0045793	bp	positive regulation of cell size	Any process that increases cell size.	0.0024738	0.0425749	2033	biological regulation
hsa04720:Long-term potentiation	GO:0001934	bp	positive regulation of protein phosphorylation	Any process that activates or increases the frequency, rate or extent of addition of phosphate groups to amino acids within a protein.	0.00266972	0.0425749	2033 ,5894	biological regulation
hsa04720:Long-term potentiation	GO:0045893	bp	positive regulation of transcription, DNA-dependent	Any process that activates or increases the frequency, rate or extent of cellular DNA-dependent transcription.	0.00281334	0.0426221	2033 ,5530 ,5594	biological regulation
hsa04720:Long-term potentiation	GO:0033160	bp	positive regulation of protein import into nucleus, translocation	Any process that activates or increases the vectorial transfer of a protein from the cytoplasm into the nucleus, across the nuclear membrane.	0.00329727	0.0456379	2033	biological regulation
hsa04720:Long-term potentiation	GO:0043923	bp	positive regulation by host of viral transcription	Any process is which a host organism activates or increases the frequency, rate or extent of viral transcription, the synthesis of either RNA on a template of DNA or DNA on a template of RNA.	0.00370879	0.0468234	2033	biological regulation
hsa04720:Long-term potentiation	GO:0010560	bp	positive regulation of glycoprotein biosynthetic process	Any process that increases the rate, frequency, or extent of the chemical reactions and pathways resulting in the formation of glycoproteins, any protein that contains covalently bound glycose (i.e. monosaccharide) residues; the glycose occurs most commonly as oligosaccharide or fairly small polysaccharide but occasionally as monosaccharide.	0.00370879	0.0468234	2033	biological regulation
hsa05212:Pancreatic cancer	GO:0000186	bp	activation of MAPKK activity	The initiation of the activity of the inactive enzyme MAP kinase kinase by phosphorylation by a MAPKKK.	8.89838e-05	0.00957444	5594 ,5894	biological regulation
hsa05212:Pancreatic cancer	GO:0051106	bp	positive regulation of DNA ligation	Any process that activates or increases the frequency, rate or extent of DNA ligation, the re-formation of a broken phosphodiester bond in the DNA backbone, carried out by DNA ligase.	0.000343879	0.0188274	5888	biological regulation
hsa05212:Pancreatic cancer	GO:0042127	bp	regulation of cell proliferation	Any process that modulates the frequency, rate or extent of cell proliferation.	0.00263323	0.0418128	5228 ,5594 ,5894	biological regulation
hsa05215:Prostate cancer	GO:0045727	bp	positive regulation of translation	Any process that activates or increases the frequency, rate or extent of the chemical reactions and pathways resulting in the formation of proteins by the translation of mRNA.	9.31097e-05	0.0083178	2033 ,5594	biological regulation
hsa05215:Prostate cancer	GO:0001934	bp	positive regulation of protein phosphorylation	Any process that activates or increases the frequency, rate or extent of addition of phosphate groups to amino acids within a protein.	0.0017959	0.0283118	2033 ,5894	biological regulation
hsa05215:Prostate cancer	GO:0060177	bp	regulation of angiotensin metabolic process	Any process that modulates the frequency, rate or extent of the chemical reactions and pathways involving angiotensin.	0.00206185	0.029083	2033	biological regulation
hsa05215:Prostate cancer	GO:0045793	bp	positive regulation of cell size	Any process that increases cell size.	0.00206185	0.029083	2033	biological regulation
hsa05215:Prostate cancer	GO:0042127	bp	regulation of cell proliferation	Any process that modulates the frequency, rate or extent of cell proliferation.	0.00263323	0.0320246	5156 ,5594 ,5894	biological regulation
hsa05215:Prostate cancer	GO:0033160	bp	positive regulation of protein import into nucleus, translocation	Any process that activates or increases the vectorial transfer of a protein from the cytoplasm into the nucleus, across the nuclear membrane.	0.00274838	0.0320246	2033	biological regulation
hsa05215:Prostate cancer	GO:0043923	bp	positive regulation by host of viral transcription	Any process is which a host organism activates or increases the frequency, rate or extent of viral transcription, the synthesis of either RNA on a template of DNA or DNA on a template of RNA.	0.00309151	0.0331409	2033	biological regulation
hsa05215:Prostate cancer	GO:0010560	bp	positive regulation of glycoprotein biosynthetic process	Any process that increases the rate, frequency, or extent of the chemical reactions and pathways resulting in the formation of glycoproteins, any protein that contains covalently bound glycose (i.e. monosaccharide) residues; the glycose occurs most commonly as oligosaccharide or fairly small polysaccharide but occasionally as monosaccharide.	0.00309151	0.0331409	2033	biological regulation
hsa05215:Prostate cancer	GO:0051090	bp	regulation of sequence-specific DNA binding transcription factor activity	Any process that modulates the frequency, rate or extent of the activity of a transcription factor, any factor involved in the initiation or regulation of transcription.	0.0034079	0.0340909	2033 ,5594	biological regulation
hsa05215:Prostate cancer	GO:0032967	bp	positive regulation of collagen biosynthetic process	Any process that activates or increases the frequency, rate or extent of the chemical reactions and pathways resulting in the formation of collagen, any of a group of fibrous proteins of very high tensile strength that form the main component of connective tissue in animals.	0.00446305	0.0398699	2033	biological regulation
hsa05215:Prostate cancer	GO:0060765	bp	regulation of androgen receptor signaling pathway	Any process that modulates the rate, frequency, or extent of the androgen receptor signaling pathway.	0.00549072	0.0420432	2033	biological regulation
hsa05215:Prostate cancer	GO:0045773	bp	positive regulation of axon extension	Any process that activates or increases the frequency, rate or extent of axon extension.	0.00720162	0.0430141	2033	biological regulation
hsa05215:Prostate cancer	GO:0043388	bp	positive regulation of DNA binding	Any process that increases the frequency, rate or extent of DNA binding. DNA binding is any process in which a gene product interacts selectively with DNA (deoxyribonucleic acid).	0.00788531	0.0440263	2033	biological regulation
hsa05215:Prostate cancer	GO:0000186	bp	activation of MAPKK activity	The initiation of the activity of the inactive enzyme MAP kinase kinase by phosphorylation by a MAPKKK.	8.89838e-05	0.0083178	5594 ,5894	biological regulation
hsa05215:Prostate cancer	GO:0060298	bp	positive regulation of sarcomere organization	Any process that increases the rate, frequency or extent myofibril assembly by organization of muscle actomyosin into sarcomeres. The sarcomere is the repeating unit of a myofibril in a muscle cell, composed of an array of overlapping thick and thin filaments between two adjacent Z discs.	0.00137495	0.0283118	2033	biological regulation
hsa05215:Prostate cancer	GO:0045893	bp	positive regulation of transcription, DNA-dependent	Any process that activates or increases the frequency, rate or extent of cellular DNA-dependent transcription.	0.00146578	0.0283118	2033 ,5594 ,9586	biological regulation
hsa05215:Prostate cancer	GO:0030335	bp	positive regulation of cell migration	Any process that activates or increases the frequency, rate or extent of cell migration.	0.00135906	0.0283118	5156 ,5594	biological regulation
hsa05216:Thyroid cancer	GO:0045737	bp	positive regulation of cyclin-dependent protein kinase activity	Any process that activates or increases the frequency, rate or extent of CDK activity.	0.00178743	0.0161688	595	biological regulation
hsa05216:Thyroid cancer	GO:0006937	bp	regulation of muscle contraction	Any process that modulates the frequency, rate or extent of muscle contraction.	0.010427	0.0277299	7170	biological regulation
hsa05216:Thyroid cancer	GO:0090257	bp	regulation of muscle system process	Any process that modulates the frequency, rate or extent of a muscle system process, a multicellular organismal process carried out by any of the organs or tissues in a muscle system.	0.0123418	0.0294353	7170	biological regulation
hsa05216:Thyroid cancer	GO:0001934	bp	positive regulation of protein phosphorylation	Any process that activates or increases the frequency, rate or extent of addition of phosphate groups to amino acids within a protein.	0.0270507	0.0477722	595	biological regulation
hsa05216:Thyroid cancer	GO:0042327	bp	positive regulation of phosphorylation	Any process that activates or increases the frequency, rate or extent of addition of phosphate groups to a molecule.	0.029627	0.0477722	595	biological regulation
hsa05216:Thyroid cancer	GO:0010562	bp	positive regulation of phosphorus metabolic process	Any process that increases the frequency, rate or extent of the chemical reactions and pathways involving phosphorus or compounds containing phosphorus.	0.0307107	0.0477722	595	biological regulation
hsa05216:Thyroid cancer	GO:0045937	bp	positive regulation of phosphate metabolic process	Any process that activates or increases the frequency, rate or extent of the chemical reactions and pathways involving phosphates.	0.0307107	0.0477722	595	biological regulation
hsa04510:Focal adhesion	GO:0035790	bp	platelet-derived growth factor receptor-alpha signaling pathway	The series of molecular signals generated as a consequence of a platelet-derived growth factor receptor-alpha binding to one of its physiological ligands.	0.000412655	0.0235213	5156	response to stimulus
hsa04510:Focal adhesion	GO:0007173	bp	epidermal growth factor receptor signaling pathway	The series of molecular signals generated as a consequence of an epidermal growth factor receptor binding to one of its physiological ligands.	0.000731765	0.0335961	5594 ,5894	response to stimulus
hsa04510:Focal adhesion	GO:0043627	bp	response to estrogen stimulus	Any process that results in a change in state or activity of a cell or an organism (in terms of movement, secretion, enzyme production, gene expression, etc.) as a result of stimulus by an estrogen, C18 steroid hormones that can stimulate the development of female sexual characteristics.	0.00156374	0.0410477	5156 ,5594	response to stimulus
hsa04510:Focal adhesion	GO:0008286	bp	insulin receptor signaling pathway	The series of molecular signals generated as a consequence of the insulin receptor binding to insulin.	0.0015843	0.0410477	5594 ,5894	response to stimulus
hsa04510:Focal adhesion	GO:0048010	bp	vascular endothelial growth factor receptor signaling pathway	The series of molecular signals generated as a consequence of vascular endothelial growth factor receptor binding to one of its physiological ligands.	9.39089e-05	0.0126558	5156 ,5228	response to stimulus
hsa04720:Long-term potentiation	GO:0009749	bp	response to glucose stimulus	Any process that results in a change in state or activity of a cell or an organism (in terms of movement, secretion, enzyme production, gene expression, etc.) as a result of a glucose stimulus.	0.000584309	0.035718	2033 ,5530	response to stimulus
hsa04720:Long-term potentiation	GO:0043627	bp	response to estrogen stimulus	Any process that results in a change in state or activity of a cell or an organism (in terms of movement, secretion, enzyme production, gene expression, etc.) as a result of stimulus by an estrogen, C18 steroid hormones that can stimulate the development of female sexual characteristics.	0.00156374	0.0384523	2033 ,5594	response to stimulus
hsa04720:Long-term potentiation	GO:0032025	bp	response to cobalt ion	Any process that results in a change in state or activity of a cell or an organism (in terms of movement, secretion, enzyme production, gene expression, etc.) as a result of a cobalt ion stimulus.	0.00206185	0.0424933	2033	response to stimulus
hsa04720:Long-term potentiation	GO:0001666	bp	response to hypoxia	Any process that results in a change in state or activity of a cell or an organism (in terms of movement, secretion, enzyme production, gene expression, etc.) as a result of a stimulus indicating lowered oxygen tension. Hypoxia, defined as a decline in O2 levels below normoxic levels of 20.8 - 20.95%, results in metabolic adaptation at both the cellular and organismal level.	0.00256456	0.0425749	2033 ,5894	response to stimulus
hsa04720:Long-term potentiation	GO:0007173	bp	epidermal growth factor receptor signaling pathway	The series of molecular signals generated as a consequence of an epidermal growth factor receptor binding to one of its physiological ligands.	0.000731765	0.035718	5594 ,5894	response to stimulus
hsa04720:Long-term potentiation	GO:0048011	bp	nerve growth factor receptor signaling pathway	The series of molecular signals generated as a consequence of the nerve growth factor receptor binding to one of its physiological ligands.	0.00331364	0.0456379	5594 ,5894	response to stimulus
hsa04720:Long-term potentiation	GO:0008286	bp	insulin receptor signaling pathway	The series of molecular signals generated as a consequence of the insulin receptor binding to insulin.	0.0015843	0.0384523	5594 ,5894	response to stimulus
hsa04720:Long-term potentiation	GO:0030168	bp	platelet activation	A series of progressive, overlapping events triggered by exposure of the platelets to subendothelial tissue. These events include shape change, adhesiveness, aggregation, and release reactions. When carried through to completion, these events lead to the formation of a stable hemostatic plug.	0.00392749	0.0476012	5594 ,5894	response to stimulus
hsa05212:Pancreatic cancer	GO:0048011	bp	nerve growth factor receptor signaling pathway	The series of molecular signals generated as a consequence of the nerve growth factor receptor binding to one of its physiological ligands.	3.38715e-05	0.00741786	5594 ,5894 ,5898	response to stimulus
hsa05212:Pancreatic cancer	GO:0007265	bp	Ras protein signal transduction	A series of molecular signals within the cell that are mediated by a member of the Ras superfamily of proteins switching to a GTP-bound active state.	0.000131157	0.00957444	5594 ,5894 ,5898	response to stimulus
hsa05212:Pancreatic cancer	GO:0007173	bp	epidermal growth factor receptor signaling pathway	The series of molecular signals generated as a consequence of an epidermal growth factor receptor binding to one of its physiological ligands.	0.00049011	0.0214668	5594 ,5894	response to stimulus
hsa05212:Pancreatic cancer	GO:0008286	bp	insulin receptor signaling pathway	The series of molecular signals generated as a consequence of the insulin receptor binding to insulin.	0.0010635	0.0291132	5594 ,5894	response to stimulus
hsa05212:Pancreatic cancer	GO:0030168	bp	platelet activation	A series of progressive, overlapping events triggered by exposure of the platelets to subendothelial tissue. These events include shape change, adhesiveness, aggregation, and release reactions. When carried through to completion, these events lead to the formation of a stable hemostatic plug.	0.00264722	0.0418128	5594 ,5894	response to stimulus
hsa05212:Pancreatic cancer	GO:0006268	bp	DNA unwinding involved in replication	The process in which interchain hydrogen bonds between two strands of DNA are broken or 'melted', generating unpaired template strands for DNA replication.	0.00206185	0.0410497	5888	response to stimulus
hsa05215:Prostate cancer	GO:0043627	bp	response to estrogen stimulus	Any process that results in a change in state or activity of a cell or an organism (in terms of movement, secretion, enzyme production, gene expression, etc.) as a result of stimulus by an estrogen, C18 steroid hormones that can stimulate the development of female sexual characteristics.	1.08142e-05	0.00289821	2033 ,5156 ,5594	response to stimulus
hsa05215:Prostate cancer	GO:0032025	bp	response to cobalt ion	Any process that results in a change in state or activity of a cell or an organism (in terms of movement, secretion, enzyme production, gene expression, etc.) as a result of a cobalt ion stimulus.	0.00171845	0.0283118	2033	response to stimulus
hsa05215:Prostate cancer	GO:0001666	bp	response to hypoxia	Any process that results in a change in state or activity of a cell or an organism (in terms of movement, secretion, enzyme production, gene expression, etc.) as a result of a stimulus indicating lowered oxygen tension. Hypoxia, defined as a decline in O2 levels below normoxic levels of 20.8 - 20.95%, results in metabolic adaptation at both the cellular and organismal level.	0.00172485	0.0283118	2033 ,5894	response to stimulus
hsa05215:Prostate cancer	GO:0043330	bp	response to exogenous dsRNA	Any process that results in a change in state or activity of a cell or an organism (in terms of movement, secretion, enzyme production, gene expression, etc.) as a result of an exogenous double-stranded RNA stimulus.	0.00549072	0.0420432	5594	response to stimulus
hsa05215:Prostate cancer	GO:0042771	bp	DNA damage response, signal transduction by p53 class mediator resulting in induction of apoptosis	A cascade of processes induced by the cell cycle regulator phosphoprotein p53, or an equivalent protein, in response to the detection of DNA damage and resulting in the initiation of apoptosis (programmed cell death).	0.00583309	0.0430141	2033	response to stimulus
hsa05215:Prostate cancer	GO:0070542	bp	response to fatty acid	Any process that results in a change in state or activity of a cell or an organism (in terms of movement, secretion, enzyme production, gene expression, etc.) as a result of a fatty acid stimulus.	0.00651754	0.0430141	2033	response to stimulus
hsa05215:Prostate cancer	GO:0055093	bp	response to hyperoxia	Any process that results in a change in state or activity of a cell or an organism (in terms of movement, secretion, enzyme production, gene expression, etc.) as a result of a stimulus indicating increased oxygen tension.	0.00720162	0.0430141	5156	response to stimulus
hsa05215:Prostate cancer	GO:0007173	bp	epidermal growth factor receptor signaling pathway	The series of molecular signals generated as a consequence of an epidermal growth factor receptor binding to one of its physiological ligands.	0.00049011	0.0262699	5594 ,5894	response to stimulus
hsa05215:Prostate cancer	GO:0035790	bp	platelet-derived growth factor receptor-alpha signaling pathway	The series of molecular signals generated as a consequence of a platelet-derived growth factor receptor-alpha binding to one of its physiological ligands.	0.000343879	0.0230399	5156	response to stimulus
hsa05215:Prostate cancer	GO:0007265	bp	Ras protein signal transduction	A series of molecular signals within the cell that are mediated by a member of the Ras superfamily of proteins switching to a GTP-bound active state.	0.00544519	0.0420432	5594 ,5894	response to stimulus
hsa05215:Prostate cancer	GO:0008286	bp	insulin receptor signaling pathway	The series of molecular signals generated as a consequence of the insulin receptor binding to insulin.	0.0010635	0.0283118	5594 ,5894	response to stimulus
hsa05215:Prostate cancer	GO:0048011	bp	nerve growth factor receptor signaling pathway	The series of molecular signals generated as a consequence of the nerve growth factor receptor binding to one of its physiological ligands.	0.00223142	0.029901	5594 ,5894	response to stimulus
hsa05215:Prostate cancer	GO:0030168	bp	platelet activation	A series of progressive, overlapping events triggered by exposure of the platelets to subendothelial tissue. These events include shape change, adhesiveness, aggregation, and release reactions. When carried through to completion, these events lead to the formation of a stable hemostatic plug.	0.00264722	0.0320246	5594 ,5894	response to stimulus
hsa05215:Prostate cancer	GO:0031663	bp	lipopolysaccharide-mediated signaling pathway	The series of molecular signals generated in response to detection of lipopolysaccharide. Lipopolysaccharides (LPS) are major components of the outer membrane of Gram-negative bacteria, making them prime targets for recognition by the immune system.	0.00754351	0.0430141	5594	response to stimulus
hsa05215:Prostate cancer	GO:0050853	bp	B cell receptor signaling pathway	A series of molecular signals initiated by the cross-linking of an antigen receptor on a B cell.	0.00754351	0.0430141	5594	response to stimulus
hsa05216:Thyroid cancer	GO:0070141	bp	response to UV-A	Any process that results in a change in state or activity of a cell or an organism (in terms of movement, secretion, enzyme production, gene expression, etc.) as a result of a UV-A radiation stimulus. UV-A radiation (UV-A light) spans the wavelengths 400 to 500 nm.	0.00055015	0.0161688	595	response to stimulus
hsa05216:Thyroid cancer	GO:0032026	bp	response to magnesium ion	Any process that results in a change in state or activity of a cell or an organism (in terms of movement, secretion, enzyme production, gene expression, etc.) as a result of a magnesium ion stimulus.	0.00137509	0.0161688	595	response to stimulus
hsa05216:Thyroid cancer	GO:0033197	bp	response to vitamin E	Any process that results in a change in state or activity of a cell or an organism (in terms of movement, secretion, enzyme production, gene expression, etc.) as a result of a vitamin E stimulus.	0.00137509	0.0161688	595	response to stimulus
hsa05216:Thyroid cancer	GO:0010039	bp	response to iron ion	Any process that results in a change in state or activity of a cell or an organism (in terms of movement, secretion, enzyme production, gene expression, etc.) as a result of an iron ion stimulus.	0.00274923	0.0165968	595	response to stimulus
hsa05216:Thyroid cancer	GO:0010165	bp	response to X-ray	Any process that results in a change in state or activity of a cell or an organism (in terms of movement, secretion, enzyme production, gene expression, etc.) as a result of X-ray radiation. An X-ray is a form of electromagnetic radiation with a wavelength in the range of 10 nanometers to 100 picometers (corresponding to frequencies in the range 30 PHz to 3 EHz).	0.00302395	0.0165968	595	response to stimulus
hsa05216:Thyroid cancer	GO:0051412	bp	response to corticosterone stimulus	Any process that results in a change in state or activity of a cell or an organism (in terms of movement, secretion, enzyme production, gene expression, etc.) as a result of a corticosterone stimulus. Corticosterone is a 21 carbon steroid hormone of the corticosteroid type, produced in the cortex of the adrenal glands. In many species, corticosterone is the principal glucocorticoid, involved in r…	0.00316129	0.0165968	595	response to stimulus
hsa05216:Thyroid cancer	GO:0051592	bp	response to calcium ion	Any process that results in a change in state or activity of a cell or an organism (in terms of movement, secretion, enzyme production, gene expression, etc.) as a result of a calcium ion stimulus.	0.0105638	0.0277299	595	response to stimulus
hsa05216:Thyroid cancer	GO:0045471	bp	response to ethanol	Any process that results in a change in state or activity of a cell or an organism (in terms of movement, secretion, enzyme production, gene expression, etc.) as a result of an ethanol stimulus.	0.0126151	0.0294353	595	response to stimulus
hsa05216:Thyroid cancer	GO:0010243	bp	response to organic nitrogen	Any process that results in a change in state or activity of a cell or an organism (in terms of movement, secretion, enzyme production, gene expression, etc.) as a result of an organic nitrogen stimulus. An organic nitrogen compound is formally a compound containing at least one carbon-nitrogen bond.	0.015074	0.0333214	595	response to stimulus
hsa05216:Thyroid cancer	GO:0043627	bp	response to estrogen stimulus	Any process that results in a change in state or activity of a cell or an organism (in terms of movement, secretion, enzyme production, gene expression, etc.) as a result of stimulus by an estrogen, C18 steroid hormones that can stimulate the development of female sexual characteristics.	0.0206631	0.0394478	595	response to stimulus
hsa05216:Thyroid cancer	GO:0014070	bp	response to organic cyclic compound	Any process that results in a change in state or activity of a cell or an organism (in terms of movement, secretion, enzyme production, gene expression, etc.) as a result of an organic cyclic compound stimulus.	0.0280002	0.0477722	595	response to stimulus
hsa05216:Thyroid cancer	GO:0030049	bp	muscle filament sliding	The sliding of actin thin filaments and myosin thick filaments past each other in muscle contraction. This involves a process of interaction of myosin located on a thick filament with actin located on a thin filament. During this process ATP is split and forces are generated.	0.0053575	0.0225015	7170	response to stimulus
hsa04510:Focal adhesion	GO:0019858	bp	cytosine metabolic process	The chemical reactions and pathways involving cytosine, 4-amino-2-hydroxypyrimidine, a pyrimidine derivative that is one of the five main bases found in nucleic acids; it occurs widely in cytidine derivatives.	0.000825168	0.0335961	5594	metabolic process
hsa04720:Long-term potentiation	GO:0019858	bp	cytosine metabolic process	The chemical reactions and pathways involving cytosine, 4-amino-2-hydroxypyrimidine, a pyrimidine derivative that is one of the five main bases found in nucleic acids; it occurs widely in cytidine derivatives.	0.000825168	0.035718	5594	metabolic process
hsa04720:Long-term potentiation	GO:0006470	bp	protein dephosphorylation	The process of removing one or more phosphoric residues from a protein.	0.00130839	0.0384523	5501 ,5530	metabolic process
hsa04720:Long-term potentiation	GO:0018076	bp	N-terminal peptidyl-lysine acetylation	The acetylation of the N-terminal lysine of proteins.	0.00164977	0.0384523	2033	metabolic process
hsa05212:Pancreatic cancer	GO:0019858	bp	cytosine metabolic process	The chemical reactions and pathways involving cytosine, 4-amino-2-hydroxypyrimidine, a pyrimidine derivative that is one of the five main bases found in nucleic acids; it occurs widely in cytidine derivatives.	0.000687663	0.0250997	5594	metabolic process
hsa05215:Prostate cancer	GO:0019858	bp	cytosine metabolic process	The chemical reactions and pathways involving cytosine, 4-amino-2-hydroxypyrimidine, a pyrimidine derivative that is one of the five main bases found in nucleic acids; it occurs widely in cytidine derivatives.	0.000687663	0.0283118	5594	metabolic process
hsa05215:Prostate cancer	GO:0008210	bp	estrogen metabolic process	The chemical reactions and pathways involving estrogens, C18 steroid hormones that can stimulate the development of female sexual characteristics. Also found in plants.	0.00617536	0.0430141	5156	metabolic process
hsa05215:Prostate cancer	GO:0018076	bp	N-terminal peptidyl-lysine acetylation	The acetylation of the N-terminal lysine of proteins.	0.00137495	0.0283118	2033	metabolic process
hsa05215:Prostate cancer	GO:0018193	bp	peptidyl-amino acid modification	The alteration of an amino acid residue in a peptide.	0.00705981	0.0430141	2033 ,5156 ,5894	metabolic process
hsa04510:Focal adhesion	GO:0007411	bp	axon guidance	The chemotaxis process that directs the migration of an axon growth cone to a specific target site in response to a combination of attractive and repulsive cues.	0.000234325	0.0166957	3915 ,5594 ,5894	developmental process
hsa04510:Focal adhesion	GO:0072277	bp	metanephric glomerular capillary formation	The process that gives rise to a metanephric glomerular capillary. This process pertains to the initial formation of a structure from unspecified parts.	0.00123754	0.0391887	5156	developmental process
hsa04510:Focal adhesion	GO:0061298	bp	retina vasculature development in camera-type eye	The process whose specific outcome is the progression of the vasculature of the retina over time, from its formation to the mature structure.	0.00206185	0.0452022	5156	developmental process
hsa05215:Prostate cancer	GO:0061298	bp	retina vasculature development in camera-type eye	The process whose specific outcome is the progression of the vasculature of the retina over time, from its formation to the mature structure.	0.00171845	0.0283118	5156	developmental process
hsa05215:Prostate cancer	GO:0030539	bp	male genitalia development	The process whose specific outcome is the progression of the male genitalia over time, from its formation to the mature structure.	0.00720162	0.0430141	5156	developmental process
hsa05215:Prostate cancer	GO:0030325	bp	adrenal gland development	The process whose specific outcome is the progression of the adrenal gland over time, from its formation to the mature structure. This gland can either be a discrete structure located bilaterally above each kidney, or a cluster of cells in the head kidney that perform the functions of the adrenal gland. In either case, this organ consists of two cells types, aminergic chromaffin cells and steroid…	0.00754351	0.0430141	5156	developmental process
hsa05215:Prostate cancer	GO:0060325	bp	face morphogenesis	The process in which the anatomical structures of the face are generated and organized. The face is the ventral division of the head.	0.00685963	0.0430141	5156	developmental process
hsa05215:Prostate cancer	GO:0060716	bp	labyrinthine layer blood vessel development	The process whose specific outcome is the progression of a blood vessel of the labyrinthine layer of the placenta over time, from its formation to the mature structure. The embryonic vessels grow through the layer to come in close contact with the maternal blood supply.	0.00412031	0.0380773	5594	developmental process
hsa05215:Prostate cancer	GO:0072277	bp	metanephric glomerular capillary formation	The process that gives rise to a metanephric glomerular capillary. This process pertains to the initial formation of a structure from unspecified parts.	0.00103135	0.0283118	5156	developmental process
hsa05215:Prostate cancer	GO:0055003	bp	cardiac myofibril assembly	The process whose specific outcome is the progression of the cardiac myofibril over time, from its formation to the mature structure. A cardiac myofibril is a myofibril specific to cardiac muscle cells.	0.00412031	0.0380773	5156	developmental process
hsa05215:Prostate cancer	GO:0007411	bp	axon guidance	The chemotaxis process that directs the migration of an axon growth cone to a specific target site in response to a combination of attractive and repulsive cues.	0.00511374	0.0420432	5594 ,5894	developmental process
hsa05215:Prostate cancer	GO:0033327	bp	Leydig cell differentiation	The process in which a relatively unspecialized cell acquires specialized structural and/or functional features of a Leydig cell. A Leydig cell is a testosterone-secreting cell in the interstitial area, between the seminiferous tubules, in the testis.	0.0048057	0.0415461	5156	developmental process
hsa05215:Prostate cancer	GO:0001553	bp	luteinization	The set of processes resulting in differentiation of theca and granulosa cells into luteal cells and in the formation of a corpus luteum after ovulation.	0.00343453	0.0340909	5156	developmental process
hsa05215:Prostate cancer	GO:0033598	bp	mammary gland epithelial cell proliferation	The multiplication or reproduction of mammary gland epithelial cells, resulting in the expansion of a cell population. Mammary gland epithelial cells make up the covering of surfaces of the mammary gland. The mammary gland is a large compound sebaceous gland that in female mammals is modified to secrete milk.	0.00617536	0.0430141	5594	developmental process
hsa05216:Thyroid cancer	GO:0001889	bp	liver development	The process whose specific outcome is the progression of the liver over time, from its formation to the mature structure. The liver is an exocrine gland which secretes bile and functions in metabolism of protein and carbohydrate and fat, synthesizes substances involved in the clotting of the blood, synthesizes vitamin A, detoxifies poisonous substances, stores glycogen, and breaks down worn-out e…	0.0100164	0.0277299	595	developmental process
hsa05216:Thyroid cancer	GO:0061008	bp	hepaticobiliary system development	The progression of the hepaticobiliary system over time, from its formation to the mature structure. The hepaticobiliary system is responsible for metabolic and catabolic processing of small molecules absorbed from the blood or gut, hormones and serum proteins, detoxification, storage of glycogen, triglycerides, metals and lipid soluble vitamins and excretion of bile. Included are the synthesis o…	0.0101533	0.0277299	595	developmental process
hsa05216:Thyroid cancer	GO:0031100	bp	organ regeneration	The regrowth of a lost or destroyed organ.	0.0065918	0.0251687	595	developmental process
hsa05216:Thyroid cancer	GO:0033327	bp	Leydig cell differentiation	The process in which a relatively unspecialized cell acquires specialized structural and/or functional features of a Leydig cell. A Leydig cell is a testosterone-secreting cell in the interstitial area, between the seminiferous tubules, in the testis.	0.00192486	0.0161688	595	developmental process
hsa04510:Focal adhesion	GO:0000189	bp	MAPK import into nucleus	The directed movement of a MAP kinase to the nucleus upon activation.	0.00123754	0.0391887	5594	establishment of localization
hsa04720:Long-term potentiation	GO:0006913	bp	nucleocytoplasmic transport	The directed movement of molecules between the nucleus and the cytoplasm.	0.00210363	0.0424933	2033 ,5501 ,5530 ,5594	establishment of localization
hsa04720:Long-term potentiation	GO:0000189	bp	MAPK import into nucleus	The directed movement of a MAP kinase to the nucleus upon activation.	0.00123754	0.0384523	5594	establishment of localization
hsa05212:Pancreatic cancer	GO:0000189	bp	MAPK import into nucleus	The directed movement of a MAP kinase to the nucleus upon activation.	0.00103135	0.0291132	5594	establishment of localization
hsa05212:Pancreatic cancer	GO:0051665	bp	membrane raft localization	Any process in which membrane rafts are transported to, or maintained in, a specific location. Membrane rafts are small (10-200 nm), heterogeneous, highly dynamic, sterol- and sphingolipid-enriched membrane domains that compartmentalize cellular processes.	0.00137495	0.0334571	5898	establishment of localization
hsa05215:Prostate cancer	GO:0000189	bp	MAPK import into nucleus	The directed movement of a MAP kinase to the nucleus upon activation.	0.00103135	0.0283118	5594	establishment of localization
hsa04720:Long-term potentiation	GO:0007268	bp	synaptic transmission	The process of communication from a neuron to a target (neuron, muscle, or secretory cell) across a synapse.	3.40744e-05	0.0103245	2891 ,5530 ,5594 ,5894	single-organism process
hsa04720:Long-term potentiation	GO:0007049	bp	cell cycle	The progression of biochemical and morphological phases and events that occur in a cell during successive cell replication or nuclear replication events. Canonically, the cell cycle comprises the replication and segregation of genetic material followed by the division of the cell, but in endocycles or syncytial cells nuclear replication or nuclear division may not be followed by cell division.	0.000718863	0.035718	2033 ,5501 ,5530 ,5594	single-organism process
hsa05212:Pancreatic cancer	GO:0007267	bp	cell-cell signaling	Any process that mediates the transfer of information from one cell to another.	0.00267297	0.0418128	5228 ,5594 ,5894	signaling
hsa05216:Thyroid cancer	GO:0000080	bp	G1 phase of mitotic cell cycle	G1 phase occurring as part of the mitotic cell cycle. G1 phase is the interval between the completion of DNA segregation (mitosis in a mitotic cell cycle) and the beginning of DNA synthesis. A mitotic cell cycle is one which canonically comprises four successive phases called G1, S, G2, and M and includes replication of the genome and the subsequent segregation of chromosomes into daughter cells.	0.00467145	0.0218001	595	cell process
hsa05216:Thyroid cancer	GO:0000084	bp	S phase of mitotic cell cycle	S phase occurring as part of the mitotic cell cycle. S phase is the part of the cell cycle during which DNA synthesis takes place. A mitotic cell cycle is one which canonically comprises four successive phases called G1, S, G2, and M and includes replication of the genome and the subsequent segregation of chromosomes into daughter cells.	0.0179387	0.0376713	595	cell process
hsa05216:Thyroid cancer	GO:0051320	bp	S phase	A cell cycle process comprising the steps by which a cell progresses through S phase, the part of the cell cycle during which DNA synthesis takes place.	0.0191652	0.0383303	595	cell process
hsa05216:Thyroid cancer	GO:0031571	bp	mitotic cell cycle G1/S transition DNA damage checkpoint	A mitotic G1/S transition checkpoint that blocks entry into S phase in response to DNA damage.	0.00960576	0.0277299	595	cell process
hsa05212:Pancreatic cancer	GO:0000730	bp	DNA recombinase assembly	The aggregation, arrangement and bonding together of strand exchange proteins (recombinases) into higher order oligomers on single-stranded DNA.	0.00171845	0.037634	5888	cellular component organization
hsa04510:Focal adhesion	GO:0005018	mf	platelet-derived growth factor alpha-receptor activity	Combining with platelet-derived growth factor isoform PDGF-AA, PDGF-BB or PDGF-AB to initiate a change in cell activity.	0.000394997	0.0213298	5156	catalytic activity
hsa04510:Focal adhesion	GO:0005021	mf	vascular endothelial growth factor-activated receptor activity	Combining with vascular endothelial growth factor and transmitting the signal across the plasma membrane to initiate a change in cell activity.	0.00315633	0.0319211	5156	catalytic activity
hsa04510:Focal adhesion	GO:0004707	mf	MAP kinase activity	Catalysis of the reaction: protein + ATP = protein phosphate + ADP. This reaction is the phosphorylation of proteins. Mitogen-activated protein kinase; a family of protein kinases that perform a crucial step in relaying signals from the plasma membrane to the nucleus. They are activated by a wide range of proliferation- or differentiation-inducing signals; activation is strong with agonists such …	0.00591131	0.0319211	5594	catalytic activity
hsa04510:Focal adhesion	GO:0008353	mf	RNA polymerase II carboxy-terminal domain kinase activity	Catalysis of the reaction: ATP + (DNA-directed RNA polymerase II) = ADP + phospho-(DNA-directed RNA polymerase II); phosphorylation occurs on residues in the carboxy-terminal domain (CTD) repeats.	0.00591131	0.0319211	5594	catalytic activity
hsa04510:Focal adhesion	GO:0004709	mf	MAP kinase kinase kinase activity	Catalysis of the phosphorylation and activation of MAP kinase kinases; each MAP kinase kinase can be phosphorylated by any of several MAP kinase kinase kinases.	0.00787527	0.0386604	5894	catalytic activity
hsa04720:Long-term potentiation	GO:0004722	mf	protein serine/threonine phosphatase activity	Catalysis of the reaction: protein serine phosphate + H2O = protein serine + phosphate, and protein threonine phosphate + H2O = protein threonine + phosphate.	0.013754	0.0480699	5501 ,5530	catalytic activity
hsa04720:Long-term potentiation	GO:0004468	mf	lysine N-acetyltransferase activity	Catalysis of the reaction: acetyl phosphate + L-lysine = phosphate + N6-acetyl-L-lysine.	0.0160886	0.0497284	2033	catalytic activity
hsa04720:Long-term potentiation	GO:0004971	mf	alpha-amino-3-hydroxy-5-methyl-4-isoxazole propionate selective glutamate receptor activity	An ionotropic glutamate receptor activity that exhibits fast gating by glutamate and acts by opening a cation channel permeable to sodium, potassium, and, in the absence of a GluR2 subunit, calcium.	0.00157921	0.0287121	2891	catalytic activity
hsa04720:Long-term potentiation	GO:0004723	mf	calcium-dependent protein serine/threonine phosphatase activity	Catalysis of the reactions: protein serine phosphate + H2O = protein serine + phosphate; and protein threonine phosphate + H2O = protein threonine + phosphate. These reactions require the presence of calcium ions.	0.00157921	0.0287121	5530	catalytic activity
hsa04720:Long-term potentiation	GO:0015277	mf	kainate selective glutamate receptor activity	An ionotropic glutamate receptor activity that exhibits fast gating by glutamate, acts by opening a cation channel permeable to sodium and potassium, and for which kainate is an agonist.	0.00276225	0.0287121	2891	catalytic activity
hsa04720:Long-term potentiation	GO:0046982	mf	protein heterodimerization activity	Interacting selectively and non-covalently with a nonidentical protein to form a heterodimer.	0.00405833	0.0287121	5530 ,5894	catalytic activity
hsa04720:Long-term potentiation	GO:0008353	mf	RNA polymerase II carboxy-terminal domain kinase activity	Catalysis of the reaction: ATP + (DNA-directed RNA polymerase II) = ADP + phospho-(DNA-directed RNA polymerase II); phosphorylation occurs on residues in the carboxy-terminal domain (CTD) repeats.	0.00591131	0.0287121	5594	catalytic activity
hsa04720:Long-term potentiation	GO:0004707	mf	MAP kinase activity	Catalysis of the reaction: protein + ATP = protein phosphate + ADP. This reaction is the phosphorylation of proteins. Mitogen-activated protein kinase; a family of protein kinases that perform a crucial step in relaying signals from the plasma membrane to the nucleus. They are activated by a wide range of proliferation- or differentiation-inducing signals; activation is strong with agonists such …	0.00591131	0.0287121	5594	catalytic activity
hsa04720:Long-term potentiation	GO:0005234	mf	extracellular-glutamate-gated ion channel activity	Catalysis of the transmembrane transfer of an ion by a channel that opens when extracellular glutamate has been bound by the channel complex or one of its constituent parts.	0.00748274	0.029751	2891	catalytic activity
hsa04720:Long-term potentiation	GO:0004709	mf	MAP kinase kinase kinase activity	Catalysis of the phosphorylation and activation of MAP kinase kinases; each MAP kinase kinase can be phosphorylated by any of several MAP kinase kinase kinases.	0.00787527	0.029751	5894	catalytic activity
hsa04720:Long-term potentiation	GO:0004402	mf	histone acetyltransferase activity	Catalysis of the reaction: acetyl-CoA + histone = CoA + acetyl-histone.	0.0160886	0.0497284	2033	catalytic activity
hsa05212:Pancreatic cancer	GO:0043142	mf	single-stranded DNA-dependent ATPase activity	Catalysis of the reaction: ATP + H2O = ADP + phosphate; this reaction requires the presence of single-stranded DNA, and it drives another reaction.	0.00131614	0.0335615	5888	catalytic activity
hsa05212:Pancreatic cancer	GO:0004707	mf	MAP kinase activity	Catalysis of the reaction: protein + ATP = protein phosphate + ADP. This reaction is the phosphorylation of proteins. Mitogen-activated protein kinase; a family of protein kinases that perform a crucial step in relaying signals from the plasma membrane to the nucleus. They are activated by a wide range of proliferation- or differentiation-inducing signals; activation is strong with agonists such …	0.00492836	0.0359067	5594	catalytic activity
hsa05212:Pancreatic cancer	GO:0008353	mf	RNA polymerase II carboxy-terminal domain kinase activity	Catalysis of the reaction: ATP + (DNA-directed RNA polymerase II) = ADP + phospho-(DNA-directed RNA polymerase II); phosphorylation occurs on residues in the carboxy-terminal domain (CTD) repeats.	0.00492836	0.0359067	5594	catalytic activity
hsa05212:Pancreatic cancer	GO:0004709	mf	MAP kinase kinase kinase activity	Catalysis of the phosphorylation and activation of MAP kinase kinases; each MAP kinase kinase can be phosphorylated by any of several MAP kinase kinase kinases.	0.00656683	0.0418635	5894	catalytic activity
hsa05215:Prostate cancer	GO:0005018	mf	platelet-derived growth factor alpha-receptor activity	Combining with platelet-derived growth factor isoform PDGF-AA, PDGF-BB or PDGF-AB to initiate a change in cell activity.	0.000329164	0.0169413	5156	catalytic activity
hsa05215:Prostate cancer	GO:0004468	mf	lysine N-acetyltransferase activity	Catalysis of the reaction: acetyl phosphate + L-lysine = phosphate + N6-acetyl-L-lysine.	0.0134248	0.0321028	2033	catalytic activity
hsa05215:Prostate cancer	GO:0008080	mf	N-acetyltransferase activity	Catalysis of the transfer of an acetyl group to a nitrogen atom on the acceptor molecule.	0.0221865	0.0469331	2033	catalytic activity
hsa05215:Prostate cancer	GO:0046983	mf	protein dimerization activity	The formation of a protein dimer, a macromolecular structure consists of two noncovalently associated identical or nonidentical subunits.	0.000908772	0.0169413	5156 ,5894 ,9586	catalytic activity
hsa05215:Prostate cancer	GO:0008353	mf	RNA polymerase II carboxy-terminal domain kinase activity	Catalysis of the reaction: ATP + (DNA-directed RNA polymerase II) = ADP + phospho-(DNA-directed RNA polymerase II); phosphorylation occurs on residues in the carboxy-terminal domain (CTD) repeats.	0.00492836	0.0169413	5594	catalytic activity
hsa05215:Prostate cancer	GO:0004707	mf	MAP kinase activity	Catalysis of the reaction: protein + ATP = protein phosphate + ADP. This reaction is the phosphorylation of proteins. Mitogen-activated protein kinase; a family of protein kinases that perform a crucial step in relaying signals from the plasma membrane to the nucleus. They are activated by a wide range of proliferation- or differentiation-inducing signals; activation is strong with agonists such …	0.00492836	0.0169413	5594	catalytic activity
hsa05215:Prostate cancer	GO:0004709	mf	MAP kinase kinase kinase activity	Catalysis of the phosphorylation and activation of MAP kinase kinases; each MAP kinase kinase can be phosphorylated by any of several MAP kinase kinase kinases.	0.00656683	0.0190092	5894	catalytic activity
hsa05215:Prostate cancer	GO:0004402	mf	histone acetyltransferase activity	Catalysis of the reaction: acetyl-CoA + histone = CoA + acetyl-histone.	0.0134248	0.0321028	2033	catalytic activity
hsa05215:Prostate cancer	GO:0005021	mf	vascular endothelial growth factor-activated receptor activity	Combining with vascular endothelial growth factor and transmitting the signal across the plasma membrane to initiate a change in cell activity.	0.00263089	0.0169413	5156	catalytic activity
hsa04510:Focal adhesion	GO:0031434	mf	mitogen-activated protein kinase kinase binding	Interacting selectively and non-covalently with a mitogen-activated protein kinase kinase, any protein that can phosphorylate a MAP kinase.	0.00355029	0.0319211	5894	binding
hsa04510:Focal adhesion	GO:0048407	mf	platelet-derived growth factor binding	Interacting selectively and non-covalently with platelet-derived growth factor.	0.00433782	0.0319211	5156	binding
hsa04510:Focal adhesion	GO:0005161	mf	platelet-derived growth factor receptor binding	Interacting selectively and non-covalently with the platelet-derived growth factor receptor.	0.00512482	0.0319211	5156	binding
hsa04510:Focal adhesion	GO:0001784	mf	phosphotyrosine binding	Interacting selectively and non-covalently with a phosphorylated tyrosine residue within a protein.	0.00512482	0.0319211	5594	binding
hsa04510:Focal adhesion	GO:0043548	mf	phosphatidylinositol 3-kinase binding	Interacting selectively and non-covalently with a phosphatidylinositol 3-kinase, any enzyme that catalyzes the addition of a phosphate group to an inositol lipid at the 3' position of the inositol ring.	0.00551813	0.0319211	5156	binding
hsa04510:Focal adhesion	GO:0031435	mf	mitogen-activated protein kinase kinase kinase binding	Interacting selectively and non-covalently with a mitogen-activated protein kinase kinase kinase, any protein that can phosphorylate a MAP kinase kinase.	0.00551813	0.0319211	5594	binding
hsa04720:Long-term potentiation	GO:0001102	mf	RNA polymerase II activating transcription factor binding	Interacting selectively and non-covalently with an RNA polymerase II transcription activating factor, a protein involved in positive regulation of transcription.	0.00236803	0.0287121	2033	binding
hsa04720:Long-term potentiation	GO:0042975	mf	peroxisome proliferator activated receptor binding	Interacting selectively and non-covalently with any of the peroxisome proliferator activated receptors, alpha, beta or gamma.	0.00276225	0.0287121	2033	binding
hsa04720:Long-term potentiation	GO:0000978	mf	RNA polymerase II core promoter proximal region sequence-specific DNA binding	Interacting selectively and non-covalently with a sequence of DNA that is in cis with and relatively close to a core promoter for RNA polymerase II.	0.00315633	0.0287121	2033	binding
hsa04720:Long-term potentiation	GO:0035259	mf	glucocorticoid receptor binding	Interacting selectively and non-covalently with a glucocorticoid receptor.	0.00315633	0.0287121	2033	binding
hsa04720:Long-term potentiation	GO:0031434	mf	mitogen-activated protein kinase kinase binding	Interacting selectively and non-covalently with a mitogen-activated protein kinase kinase, any protein that can phosphorylate a MAP kinase.	0.00355029	0.0287121	5894	binding
hsa04720:Long-term potentiation	GO:0051019	mf	mitogen-activated protein kinase binding	Interacting selectively and non-covalently with a mitogen-activated protein kinase.	0.00433782	0.0287121	2033	binding
hsa04720:Long-term potentiation	GO:0001784	mf	phosphotyrosine binding	Interacting selectively and non-covalently with a phosphorylated tyrosine residue within a protein.	0.00512482	0.0287121	5594	binding
hsa04720:Long-term potentiation	GO:0031435	mf	mitogen-activated protein kinase kinase kinase binding	Interacting selectively and non-covalently with a mitogen-activated protein kinase kinase kinase, any protein that can phosphorylate a MAP kinase kinase.	0.00551813	0.0287121	5594	binding
hsa04720:Long-term potentiation	GO:0031490	mf	chromatin DNA binding	Interacting selectively and non-covalently with DNA that is assembled into chromatin.	0.00669728	0.029751	2033	binding
hsa04720:Long-term potentiation	GO:0051059	mf	NF-kappaB binding	Interacting selectively and non-covalently with NF-kappaB, a transcription factor for eukaryotic RNA polymerase II promoters.	0.00787527	0.029751	2033	binding
hsa04720:Long-term potentiation	GO:0050681	mf	androgen receptor binding	Interacting selectively and non-covalently with an androgen receptor.	0.0141382	0.0480699	2033	binding
hsa05212:Pancreatic cancer	GO:0031755	mf	Edg-2 lysophosphatidic acid receptor binding	Interacting selectively and non-covalently with an Edg-2 lysophosphatidic acid receptor.	0.000658241	0.0335615	5898	binding
hsa05212:Pancreatic cancer	GO:0031434	mf	mitogen-activated protein kinase kinase binding	Interacting selectively and non-covalently with a mitogen-activated protein kinase kinase, any protein that can phosphorylate a MAP kinase.	0.00295936	0.0359067	5894	binding
hsa05212:Pancreatic cancer	GO:0001784	mf	phosphotyrosine binding	Interacting selectively and non-covalently with a phosphorylated tyrosine residue within a protein.	0.00427237	0.0359067	5594	binding
hsa05212:Pancreatic cancer	GO:0031435	mf	mitogen-activated protein kinase kinase kinase binding	Interacting selectively and non-covalently with a mitogen-activated protein kinase kinase kinase, any protein that can phosphorylate a MAP kinase kinase.	0.00460041	0.0359067	5594	binding
hsa05212:Pancreatic cancer	GO:0005524	mf	ATP binding	Interacting selectively and non-covalently with ATP, adenosine 5'-triphosphate, a universally important coenzyme and enzyme regulator.	0.00812242	0.046027	5594 ,5888 ,5894	binding
hsa05215:Prostate cancer	GO:0001102	mf	RNA polymerase II activating transcription factor binding	Interacting selectively and non-covalently with an RNA polymerase II transcription activating factor, a protein involved in positive regulation of transcription.	0.00197368	0.0169413	2033	binding
hsa05215:Prostate cancer	GO:0042975	mf	peroxisome proliferator activated receptor binding	Interacting selectively and non-covalently with any of the peroxisome proliferator activated receptors, alpha, beta or gamma.	0.00230233	0.0169413	2033	binding
hsa05215:Prostate cancer	GO:0000978	mf	RNA polymerase II core promoter proximal region sequence-specific DNA binding	Interacting selectively and non-covalently with a sequence of DNA that is in cis with and relatively close to a core promoter for RNA polymerase II.	0.00263089	0.0169413	2033	binding
hsa05215:Prostate cancer	GO:0035259	mf	glucocorticoid receptor binding	Interacting selectively and non-covalently with a glucocorticoid receptor.	0.00263089	0.0169413	2033	binding
hsa05215:Prostate cancer	GO:0031434	mf	mitogen-activated protein kinase kinase binding	Interacting selectively and non-covalently with a mitogen-activated protein kinase kinase, any protein that can phosphorylate a MAP kinase.	0.00295936	0.0169413	5894	binding
hsa05215:Prostate cancer	GO:0048407	mf	platelet-derived growth factor binding	Interacting selectively and non-covalently with platelet-derived growth factor.	0.00361604	0.0169413	5156	binding
hsa05215:Prostate cancer	GO:0051019	mf	mitogen-activated protein kinase binding	Interacting selectively and non-covalently with a mitogen-activated protein kinase.	0.00361604	0.0169413	2033	binding
hsa05215:Prostate cancer	GO:0005161	mf	platelet-derived growth factor receptor binding	Interacting selectively and non-covalently with the platelet-derived growth factor receptor.	0.00427237	0.0169413	5156	binding
hsa05215:Prostate cancer	GO:0001784	mf	phosphotyrosine binding	Interacting selectively and non-covalently with a phosphorylated tyrosine residue within a protein.	0.00427237	0.0169413	5594	binding
hsa05215:Prostate cancer	GO:0043548	mf	phosphatidylinositol 3-kinase binding	Interacting selectively and non-covalently with a phosphatidylinositol 3-kinase, any enzyme that catalyzes the addition of a phosphate group to an inositol lipid at the 3' position of the inositol ring.	0.00460041	0.0169413	5156	binding
hsa05215:Prostate cancer	GO:0031435	mf	mitogen-activated protein kinase kinase kinase binding	Interacting selectively and non-covalently with a mitogen-activated protein kinase kinase kinase, any protein that can phosphorylate a MAP kinase kinase.	0.00460041	0.0169413	5594	binding
hsa05215:Prostate cancer	GO:0031490	mf	chromatin DNA binding	Interacting selectively and non-covalently with DNA that is assembled into chromatin.	0.00558401	0.0180659	2033	binding
hsa05215:Prostate cancer	GO:0051059	mf	NF-kappaB binding	Interacting selectively and non-covalently with NF-kappaB, a transcription factor for eukaryotic RNA polymerase II promoters.	0.00656683	0.0190092	2033	binding
hsa05215:Prostate cancer	GO:0005524	mf	ATP binding	Interacting selectively and non-covalently with ATP, adenosine 5'-triphosphate, a universally important coenzyme and enzyme regulator.	0.00812242	0.0223367	5156 ,5594 ,5894	binding
hsa05215:Prostate cancer	GO:0050681	mf	androgen receptor binding	Interacting selectively and non-covalently with an androgen receptor.	0.0117954	0.0308927	2033	binding
hsa05215:Prostate cancer	GO:0008013	mf	beta-catenin binding	Interacting selectively and non-covalently with the beta subunit of the catenin complex.	0.0173266	0.0397069	2033	binding
hsa05215:Prostate cancer	GO:0003823	mf	antigen binding	Interacting selectively and non-covalently with an antigen, any substance which is capable of inducing a specific immune response and of reacting with the products of that response, the specific antibody or specifically sensitized T-lymphocytes, or both. Binding may counteract the biological activity of the antigen.	0.0202449	0.0445388	2033	binding
hsa05215:Prostate cancer	GO:0019902	mf	phosphatase binding	Interacting selectively and non-covalently with any phosphatase.	0.0238022	0.048486	5594	binding
hsa04510:Focal adhesion	GO:0005741	cc	mitochondrial outer membrane	The outer, i.e. cytoplasm-facing, lipid bilayer of the mitochondrial envelope.	0.000609242	0.0243859	5501 ,5894	membrane
hsa04510:Focal adhesion	GO:0043260	cc	laminin-11 complex	A laminin complex composed of alpha5, beta2 and gamma1 polypeptide chains.	0.00107585	0.0243859	3915	membrane
hsa04510:Focal adhesion	GO:0043259	cc	laminin-10 complex	A laminin complex composed of alpha5, beta1 and gamma1 polypeptide chains.	0.00107585	0.0243859	3915	membrane
hsa04510:Focal adhesion	GO:0005606	cc	laminin-1 complex	A laminin complex composed of alpha1, beta1 and gamma1 polypeptide chains.	0.00250881	0.0324902	3915	membrane
hsa04720:Long-term potentiation	GO:0005741	cc	mitochondrial outer membrane	The outer, i.e. cytoplasm-facing, lipid bilayer of the mitochondrial envelope.	0.000609242	0.0315629	5501 ,5894	membrane
hsa04720:Long-term potentiation	GO:0032281	cc	alpha-amino-3-hydroxy-5-methyl-4-isoxazolepropionic acid selective glutamate receptor complex	An assembly of four or five subunits which form a structure with an extracellular N-terminus and a large loop that together form the ligand binding domain. The C-terminus is intracellular. The ionotropic glutamate receptor complex itself acts as a ligand gated ion channel; on binding glutamate, charged ions pass through a channel in the center of the receptor complex. The AMPA receptors mediate f…	0.0042976	0.0472736	2891	membrane
hsa04510:Focal adhesion	GO:0032839	cc	dendrite cytoplasm	All of the contents of a dendrite, excluding the surrounding plasma membrane.	0.00358241	0.0348005	5594	cell part
hsa04720:Long-term potentiation	GO:0005626	cc	insoluble fraction	That fraction of cells, prepared by disruptive biochemical methods, that is not soluble in water.	0.00248324	0.045036	5530 ,5594 ,5894	cell part
hsa04720:Long-term potentiation	GO:0005829	cc	cytosol	The part of the cytoplasm that does not contain organelles but which does contain other particulate matter, such as protein complexes.	0.00341421	0.045036	5501 ,5530 ,5594 ,5894	cell part
hsa04720:Long-term potentiation	GO:0032839	cc	dendrite cytoplasm	All of the contents of a dendrite, excluding the surrounding plasma membrane.	0.00358241	0.045036	5594	cell part
hsa05216:Thyroid cancer	GO:0005862	cc	muscle thin filament tropomyosin	A form of the tropomyosin dimer found associated with actin and the troponin complex in muscle thin filaments.	0.000478254	0.00956509	7170	cell part
hsa05216:Thyroid cancer	GO:0001725	cc	stress fiber	A contractile actin filament bundle that consists of short actin filaments with alternating polarity, cross-linked by alpha-actinin and possibly other actin bundling proteins, and with myosin present in a periodic distribution along the fiber.	0.00418085	0.0278723	7170	cell part
hsa04720:Long-term potentiation	GO:0005955	cc	calcineurin complex	A heterodimeric calcium ion and calmodulin dependent protein phosphatase composed of catalytic and regulatory subunits; the regulatory subunit is very similar in sequence to calmodulin.	0.000717339	0.0315629	5530	macromolecular complex
hsa04720:Long-term potentiation	GO:0072357	cc	PTW/PP1 phosphatase complex	A protein serine/threonine phosphatase complex that contains a catalytic subunits (PPP1CA, PPP1CB or PPP1CC) and the regulatory subunits PPP1R10 (PNUTS), TOX4 and WDR82, and plays a role in the control of chromatin structure and cell cycle progression during the transition from mitosis into interphase.	0.00250881	0.045036	5501	macromolecular complex
hsa04720:Long-term potentiation	GO:0070688	cc	MLL5-L complex	A protein complex that can methylate lysine-4 of histone H3 and plays an essential role in retinoic-acid-induced granulopoiesis. MLL5 is the catalytic methyltransferase subunit, and the complex also contains serine/threonine kinase 38 (STK38), protein phosphatase 1 catalytic subunits, the host cell factor-1 N-terminal subunit, beta-actin, and O-GlcNAc transferase; the human genes encoding the sub…	0.00286678	0.045036	5501	macromolecular complex
hsa04510:Focal adhesion	GO:0072357	cc	PTW/PP1 phosphatase complex	A protein serine/threonine phosphatase complex that contains a catalytic subunits (PPP1CA, PPP1CB or PPP1CC) and the regulatory subunits PPP1R10 (PNUTS), TOX4 and WDR82, and plays a role in the control of chromatin structure and cell cycle progression during the transition from mitosis into interphase.	0.00250881	0.0324902	5501	macromolecular complex
hsa04510:Focal adhesion	GO:0070688	cc	MLL5-L complex	A protein complex that can methylate lysine-4 of histone H3 and plays an essential role in retinoic-acid-induced granulopoiesis. MLL5 is the catalytic methyltransferase subunit, and the complex also contains serine/threonine kinase 38 (STK38), protein phosphatase 1 catalytic subunits, the host cell factor-1 N-terminal subunit, beta-actin, and O-GlcNAc transferase; the human genes encoding the sub…	0.00286678	0.0324902	5501	macromolecular complex
hsa05216:Thyroid cancer	GO:0000307	cc	cyclin-dependent protein kinase holoenzyme complex	Cyclin-dependent protein kinases (CDKs) are heterodimeric enzymes that contain a kinase catalytic subunit associated with a regulatory cyclin partner.	0.00203179	0.0203179	595	macromolecular complex
