# Supplementary material for: Detecting Key Genes Regulated by miRNAs in Dysfunctional Crosstalk Pathway of Myasthenia Gravis
Source: Biomed Res Int. 2015 Feb 1;2015:724715. doi: 10.1155/2015/724715 (PMC4331476; doi:10.1155/2015/724715)
Supplement: Supplementary file 1 — Table S1: MiRNAs and mRNAs differentially expressed in MG Table S1 lists the miRNAs and mRNAs differentially expressed in MG. A total of 46 differentially expressed miRNAs were identified, including 21 upregulated miRNAs and 25 downregulated miRNAs. A total of 1135 differentially expressed mRNAs were obtained, including 551 upregulated mRNAs and 584 downregulated mRNAs. Table S2: The predicted targets of differentially expressed miRNAs Table S2 lists the predicted targets of differentially expressed miRNAs. A total of 46 differentially expressed miRNAs, 9567 predicted targets, 34963 miRNA-target regulations were obtained. Table S3: Pathways enriched in differentially expressed mRNAs and predicted target genes of differentially expressed miRNAs Table S3 presents significant pathways enriched by differentially expressed mRNAs and predicted genes of differentially expressed miRNAs. The up- and down-regulated mRNAs were significantly enriched in 13 pathways (define as P1) and 8 pathways (define as P2), respectively. The predicted targets of up- and down-regulated miRNAs were significantly enriched in 64 pathways (define as P3) and 68 pathways (define as P4), respectively. [file 724715.f1.zip › Optional Supplementary Materials/Table S7.xlsx]

## Sheet: Sheet1
Table S7 Key genes enriched in LAPs
LAPId	pathwayName	Component List
LAP_04720_1	Long-term potentiation	10411;107;11261;114;1387;163688;2033;23236;2890;2891;2902;2903;2904;2905;2906;2911;2915;3265;369;3708;3709;3710;3845;4659;4893;51806;5330;5331;5332;5499;5500;5501;5502;5530;5532;5533;5534;5535;5566;5567;5568;5578;5579;5582;5594;5595;5613;5894;63928;673;775;801;805;808;810;814;815;816;817;818
LAP_04720_2	Long-term potentiation	10411;107;11261;114;1387;163688;2033;27330;2890;2891;2902;2903;2904;2905;2906;2911;2915;3265;369;3708;3709;3710;3845;4659;468;4893;51806;5499;5500;5501;5502;5530;5532;5533;5534;5535;5566;5567;5568;5594;5595;5604;5605;5613;5894;6195;6196;6197;63928;673;775;801;805;808;810;814;815;816;817;818
LAP_04720_3	Long-term potentiation	10411;107;11261;114;163688;2890;2891;2902;2903;2904;2905;2906;2911;2915;3265;369;3708;3709;3710;3845;4659;4893;51806;5499;5500;5501;5502;5530;5532;5533;5534;5535;5566;5567;5568;5578;5579;5582;5594;5595;5613;5894;5906;5908;63928;673;775;801;805;808;810;814;815;816;817;818
LAP_04720_4	Long-term potentiation	10411;107;11261;114;163688;27330;2890;2891;2902;2903;2904;2905;2906;2911;2915;3265;369;3708;3709;3710;3845;4659;468;4893;51806;5499;5500;5501;5502;5530;5532;5533;5534;5535;5566;5567;5568;5594;5595;5604;5605;5613;5894;5906;5908;6195;6196;6197;63928;673;775;801;805;808;810;814;815;816;817;818
LAP_04720_5	Long-term potentiation	10411;107;11261;114;163688;2776;2890;2891;2902;2903;2904;2905;2906;2911;2915;3265;3708;3709;3710;3845;4659;4893;51806;5499;5500;5501;5502;5530;5532;5533;5534;5535;5566;5567;5568;5578;5579;5582;5594;5595;5613;5906;5908;63928;775;801;805;808;810;814;815;816;817;818
LAP_04720_6	Long-term potentiation	10411;107;11261;114;163688;23236;2776;2890;2891;2902;2903;2904;2905;2906;2911;2915;3265;3708;3709;3710;3845;4659;4893;51806;5330;5331;5332;5499;5500;5501;5502;5530;5532;5533;5534;5535;5566;5567;5568;5578;5579;5582;5594;5595;5613;63928;775;801;805;808;810;814;815;816;817;818
LAP_05215_1	Prostate cancer	3320;3326;354;367;369;5594;5595;5604;5605;5894;673;7184
LAP_05215_4	Prostate cancer	10000;10488;1385;1387;148327;1499;2033;207;208;2932;468;51176;595;64764;6932;6934;7157;83439;84699;90993;9586
LAP_05215_5	Prostate cancer	10000;1026;1027;10488;1147;1385;1387;148327;1499;2033;207;208;2308;23533;2475;2932;3551;4193;468;4824;51176;5170;5290;5291;5293;5294;5295;5296;572;5728;64764;6932;6934;7157;83439;842;84699;8503;8517;90993;9586
LAP_05215_7	Prostate cancer	1950;1956;2064;2260;2263;23533;2885;3265;3479;3480;3630;3645;3845;4893;5154;5155;5156;5159;5290;5291;5293;5294;5295;5296;56034;6654;6655;7039;80310;8503
LAP_05215_8	Prostate cancer	1956;2064;2260;2263;2885;3265;3480;3645;369;3845;4893;5156;5159;5894;6654;6655;673
LAP_05215_9	Prostate cancer	10000;1026;1027;1147;1950;1956;2064;207;208;2260;2263;2308;23533;2475;2885;2932;3479;3480;3551;3630;3645;4193;4824;5154;5155;5156;5159;5170;5290;5291;5293;5294;5295;5296;56034;572;5728;7039;80310;842;8503;8517
LAP_05215_10	Prostate cancer	10000;1026;1027;10488;1147;1385;148327;1499;1956;2064;207;208;2260;2263;2308;23533;2475;2932;3480;3551;3645;4193;468;4792;4824;5156;5159;5170;5290;5291;5293;5294;5295;5296;572;5728;64764;7157;842;84699;8503;8517;90993;9586
LAP_05215_11	Prostate cancer	2885;3265;369;3845;4893;5604;5605;5894;6654;6655;673
LAP_05212_1	Pancreatic cancer	10000;1950;1956;2064;207;208;2277;23533;3716;4790;5228;5290;5291;5293;5294;5295;5296;5970;598;6772;6774;7039;7422;7423;7424;8503
LAP_05212_3	Pancreatic cancer	10000;1147;207;208;23533;3551;369;3845;5290;5291;5293;5294;5295;5296;572;5879;5880;5881;5894;5900;673;842;8503;8517;9459
LAP_05212_4	Pancreatic cancer	10000;207;208;23533;369;3845;5290;5291;5293;5294;5295;5296;5604;5605;5894;5898;5899;5900;673;8503;9459
LAP_05212_5	Pancreatic cancer	23533;369;3845;5290;5291;5293;5294;5295;5296;5594;5595;5599;5601;5602;5604;5605;5894;5900;673;8503
LAP_05212_6	Pancreatic cancer	10928;23533;369;3845;5290;5291;5293;5294;5295;5296;5894;5898;5899;5900;673;8503
LAP_05212_7	Pancreatic cancer	10928;3845;5879;5880;5881;5898;5899;5900;998
LAP_05212_10	Pancreatic cancer	5888;675
LAP_04510_10	Focal adhesion	1499;2002;329;330;331;3725;5594;5595;5604;5605;595;596;894;896
LAP_04510_11	Focal adhesion	10298;10451;1793;23533;3265;4638;5058;5062;5063;5290;5291;5293;5294;5295;5296;5594;5595;5599;5601;5602;5604;5605;56924;57144;572;5879;5880;5881;5894;5906;5908;673;7409;7410;8503;85366;91807;998
LAP_04510_12	Focal adhesion	10000;10451;1950;1956;2064;207;208;2277;2321;2324;23533;25759;2885;29780;3082;3265;3479;3480;3611;3688;3690;3691;3693;3694;3695;3696;3791;399694;4233;5154;5155;5156;5159;5170;5228;5290;5291;5293;5294;5295;5296;53358;55742;5578;5579;5582;56034;5728;5747;5829;5894;5923;64098;6464;6654;6655;6714;7409;7410;7422;7423;7424;80310;824;8503;9564
LAP_04510_13	Focal adhesion	10000;10319;10451;1101;1277;1278;1280;1281;1282;1284;1286;1288;1289;1290;1291;1292;1293;1301;1302;1311;131873;1398;1399;1950;1956;2064;207;208;2277;22798;2316;2317;2318;2321;2324;2335;23533;2534;25759;284217;2885;2909;29780;3082;3265;3371;3381;3479;3480;3611;3688;3690;3691;3693;3694;3695;3696;3791;387;3908;3909;3910;3911;3912;3913;3914;3915;3918;394;399694;4233;50509;5154;5155;5156;5159;5170;5228…
LAP_04510_15	Focal adhesion	10298;10451;1793;23533;2889;5058;5062;5063;5290;5291;5293;5294;5295;5296;5594;5595;5599;5601;5602;5604;5605;56924;57144;572;5879;5880;5881;5894;5906;5908;595;673;7409;7410;8503;894;896
LAP_04510_18	Focal adhesion	10000;10298;10451;1793;207;208;23533;2889;3611;3725;5058;5062;5063;5170;5290;5291;5293;5294;5295;5296;5599;5601;5602;5604;5605;56924;57144;5879;5880;5881;5894;5906;5908;595;7409;7410;8503;894;896
LAP_04510_19	Focal adhesion	10000;10451;1499;1956;2064;207;208;2321;2324;23533;2932;29780;3265;3480;3611;3791;4233;5156;5159;5170;5290;5291;5293;5294;5295;5296;55742;5599;5601;5602;5747;5829;5879;5880;5881;64098;7409;7410;8503
LAP_04510_2	Focal adhesion	10298;103910;10398;10627;1398;1399;29895;3611;4633;4636;4638;4659;5058;5062;5063;5499;5500;5501;5604;5605;56924;57144;58498;5879;5880;5881;5894;60;6093;71;85366;91807;93408;9475;998
LAP_04510_5	Focal adhesion	10000;10319;10451;1101;1277;1278;1280;1281;1282;1284;1286;1288;1289;1290;1291;1292;1293;1301;1302;1311;131873;1398;1399;1729;1956;2064;207;208;22798;22801;2316;2317;2318;2321;2324;2335;23533;25759;284217;2909;29780;3371;3381;3480;3611;3655;3672;3673;3674;3675;3676;3678;3679;3680;3685;3688;3690;3691;3693;3694;3695;3696;3791;387;3908;3909;3910;3911;3912;3913;3914;3915;3918;394;399694;4233;50509;515…
LAP_04510_6	Focal adhesion	10000;10319;10451;1101;1277;1278;1280;1281;1282;1284;1286;1288;1289;1290;1291;1292;1293;1301;1302;1311;131873;1398;1399;1956;2064;207;208;22798;22801;2316;2317;2318;2321;2324;2335;23533;2534;25759;284217;2909;29780;3265;3371;3381;3480;3611;3655;3672;3673;3674;3675;3676;3678;3679;3680;3685;3688;3690;3691;3693;3694;3695;3696;3791;387;3908;3909;3910;3911;3912;3913;3914;3915;3918;394;399694;4233;5050…
LAP_04510_7	Focal adhesion	10000;10319;10451;1101;1277;1278;1280;1281;1282;1284;1286;1288;1289;1290;1291;1292;1293;1301;1302;1311;131873;1398;1399;1956;2064;207;208;22798;22801;2316;2317;2318;2321;2324;2335;23533;2534;25759;284217;2909;29780;3371;3381;3480;3611;3655;3672;3673;3674;3675;3676;3678;3679;3680;3685;3688;3690;3691;3693;3694;3695;3696;3791;387;3908;3909;3910;3911;3912;3913;3914;3915;3918;394;399694;4233;50509;515…
LAP_04510_8	Focal adhesion	10298;2002;329;330;331;5058;5062;5063;5594;5595;5604;5605;56924;57144;572;5894;595;596;673;894;896
LAP_04510_9	Focal adhesion	10298;103910;10398;10451;10627;1793;23533;29895;3265;4633;4636;4638;5058;5062;5063;5290;5291;5293;5294;5295;5296;5594;5595;5599;5601;5602;5604;5605;56924;57144;572;58498;5879;5880;5881;5894;673;7409;7410;8503;85366;91807;93408;998
LAP_05216_2	Thyroid cancer	10342;3265;3845;4893;4914;5594;5595;5604;5605;5979;673;7170;7175;8030;8031
LAP_05216_4	Thyroid cancer	1499;4609;51176;595;6932;6934;83439;999
